# Supplementary material for: Synthesis and antibacterial activity of 8-nitro-7-(aryl/alkyl) and tetracyclic fluoroquinolones encompassing thiophene, furan, and related congeners
Source: publisher site journal article supplement (doi:10.1515/znc-2025-0091), 2025-07-31
Supplement: Supplementary file 1 [file j_znc-2025-0091_suppl_001.docx]

**Saporting data**

**Synthesis and Antibacterial Activity of 8-Nitro-7-(aryl/alkyl) and Tetracyclic Fluoroquinolones Encompassing Thiophene, Furan, and Related Congeners**

Ala’a A. Al-Akhras1+2, Shaima' K. Alsawaleha2, Salma A. Musameh2, Jalal A. Zahra2*, Mustafa M. El-Abadelah2, Marwan abu-halaweh3 and Monther A. Khanfar

[NMR SPECTRUM 7](#_Toc13975)

[Figure 1.1: The 1H-NMR spectrum of compound **12a** (DMSO-d6). 7](#_Toc21466)

[Figure 1.2: The 13C-NMR spectrum of compound **12a** (DMSO-d6). 7](#_Toc6714)

[Figure 1.3: The DEPT (135) spectrum of compound **12a** (DMSO-d6). 8](#_Toc24656)

[Figure 1.4: The COSY spectrum of compound **12a** (DMSO-d6). 8](#_Toc10080)

[Figure 1.5: The HMQC spectrum of compound **12a** (DMSO-d6). 9](#_Toc5993)

[Figure 1.6: The HMBC spectrum of compound **12a** (DMSO-d6). 9](#_Toc1045)

[Figure 1.7: The 1H-NMR spectrum of compound **15a** (DMSO-d6). 10](#_Toc8811)

[Figure 1.8: The 13C-NMR spectrum of compound **15a** (DMSO-d6). 10](#_Toc2632)

[Figure 1.10: The COSY spectrum of compound **15a** (DMSO-d6). 11](#_Toc31301)

[Figure 1.11: The HMQC spectrum of compound **15a** (DMSO-d6). 12](#_Toc8958)

[Figure 1.12: The HMBC spectrum of compound **15a** (DMSO-d6). 12](#_Toc12401)

[Figure 1.13: The 1H-NMR spectrum of compound 19a (DMSO-d6). 13](#_Toc23598)

[Figure 1.14: The 13C-NMR spectrum of compound **19a** (DMSO-d6). 13](#_Toc23526)

[Figure 1.15: The DEPT (135) spectrum of compound **19a** (DMSO-d6). 14](#_Toc5734)

[Figure 1.16: The COSY spectrum of compound **19a** (DMSO-d6). 14](#_Toc12963)

[Figure 1.17: The HMQC spectrum of compound **19a** (DMSO-d6). 15](#_Toc20646)

[Figure 1.18: The HMBC spectrum of compound **19a** (DMSO-d6). 15](#_Toc23711)

[Figure 1.19: The 1H-NMR spectrum of compound **20a** (DMSO-d6). 16](#_Toc3099)

[Figure 1.20: The 13C-NMR spectrum of compound **20a** (DMSO-d6). 16](#_Toc13087)

[Figure 1.23: The HMQC spectrum of compound **20a** (DMSO-d6). 18](#_Toc30651)

[Figure 1.24: The HMBC spectrum of compound**20a** (DMSO-d6). 18](#_Toc16912)

[Figure 1.25: The 1H-NMR spectrum of compound **11b** (DMSO-d6). 20](#_Toc10399)

[Figure 1.26: The 13C-NMR spectrum of compound **11b** (DMSO-d6). 20](#_Toc8249)

[Figure 1.27: The DEPT (135) spectrum of compound **11b** (DMSO-d6). 21](#_Toc972)

[Figure 1.28: The COSY spectrum of compound **11b** (DMSO-d6). 21](#_Toc21857)

[Figure 1.29: The HMQC spectrum of compound **11b** (DMSO-d6). 22](#_Toc6499)

[Figure 1.30: The HMBC spectrum of compound **11b** (DMSO-d6). 22](#_Toc23049)

[Figure 1.33: The DEPT (135) spectrum of compound **13b** (DMSO-d6). 24](#_Toc3392)

[Figure 1.34: The COSY spectrum of compound **13b** (DMSO-d6). 24](#_Toc658)

[Figure 1.35: The HMQC spectrum of compound **13b** (DMSO-d6). 25](#_Toc27244)

[Figure 1.36: The HMBC spectrum of compound **13b** (DMSO-d6). 25](#_Toc15710)

[Figure 1.39: The DEPT (135) spectrum of compound **14b** (DMSO-d6). 27](#_Toc16181)

[Figure 1.40: The COSY spectrum of compound **14b** (DMSO-d6). 27](#_Toc15128)

[Figure 1.41: The HMQC spectrum of compound **14b** (DMSO-d6). 28](#_Toc12011)

[Figure 1.42: The HMBC spectrum of compound **14b** (DMSO-d6). 28](#_Toc6641)

[Figure 1.45: The DEPT (135) spectrum of compound **16b** (DMSO-d6). 30](#_Toc20111)

[Figure 1.46 The COSY spectrum of compound **16b** (DMSO-d6). 30](#_Toc13338)

[Figure 1.47: The HMQC spectrum of compound **16b** (DMSO-d6). 31](#_Toc3065)

[Figure 1.48: The HMBC spectrum of compound **16b** (DMSO-d6). 31](#_Toc29384)

[Figure 1.51: The DEPT (135) spectrum of compound **18b** (DMSO-d6). 33](#_Toc6983)

[Figure 1.52: The COSY spectrum of compound **18b** (DMSO-d6). 33](#_Toc21112)

[Figure 1.53: The HMQC spectrum of compound **18b** (DMSO-d6). 34](#_Toc1160)

[Figure 1.54: The HMBC spectrum of compound **18b** (DMSO-d6). 34](#_Toc27228)

[Figure 1.57: The DEPT (135) spectrum of compound **15b** (DMSO-d6). 36](#_Toc31749)

[Figure 1.58: The COSY spectrum of compound **15b** (DMSO-d6). 36](#_Toc6157)

[Figure 1.59: The HMQC spectrum of compound **15b** (DMSO-d6). 37](#_Toc16794)

[Figure 1.60: The HMBC spectrum of compound **15b** (DMSO-d6). 37](#_Toc14842)

[Figure 1.63: The DEPT (135) spectrum of compound **20a** (DMSO-d6). 39](#_Toc26610)

[Figure 1.64: The COSY spectrum of compound **20a** (DMSO-d6). 39](#_Toc30257)

[Figure 1.65: The HMQC spectrum of compound **20a** (DMSO-d6). 40](#_Toc10929)

[Figure 1.66: The HMBC spectrum of compound **20a** (DMSO-d6). 40](#_Toc14442)

[Figure 1.69: The DEPT (135) spectrum of compound **19b** (DMSO-d6) 42](#_Toc29383)

[Figure 1.70: The COSY spectrum of compound **19b** (DMSO-d6). 42](#_Toc10626)

[Figure 1.71: The HMQC spectrum of compound **19b** (DMSO-d6). 43](#_Toc25222)

[Figure 1.72: The HMBC spectrum of compound **19b** (DMSO-d6). 43](#_Toc13263)

[Figure 1.73: The 1H-NMR spectrum of compound **12a** (DMSO-d6). 44](#_Toc20267)

[Figure 1.74: The 13C-NMR spectrum of compound **12a** (DMSO-d6). 44](#_Toc741)

[Figure 1.75: The DEPT (135) spectrum of compound **12a** (DMSO-d6) 45](#_Toc31741)

[Figure 1.76: The COSY spectrum of compound **12a** (DMSO-d6). 45](#_Toc8910)

[Figure 1.77: The HMQC spectrum of compound **12a** (DMSO-d6). 46](#_Toc19259)

[Figure 1.78: The HMBC spectrum of compound **12a** (DMSO-d6). 46](#_Toc16839)

[Mass SPECTRUM 47](#_Toc31577)

[Figure 2.1: The Mass spectrum for compound **11b**, [M+Na]+. 47](#_Toc28914)

[Figure 2.2: The Mass spectrum for compound **14b**, [M+Na]+. 47](#_Toc31594)

[Figure 2.3: The Mass spectrum for compound **12a**, [M+H]+. 47](#_Toc25513)

[Figure 2.4: The Mass spectrum for compound **12b**, [M+H]+. 48](#_Toc30636)

[Figure 2.5: The Mass spectrum for compound **20a**, [M+H]+. 48](#_Toc27215)

[Figure 2.6: The Mass spectrum for compound **20b**, [M+H]+. 49](#_Toc1931)

[Figure 2.7: The Mass spectrum for compound **19a**, [M+H]+. 49](#_Toc3291)

[Figure 2.8: The Mass spectrum for compound **19b**, [M+Na]+. 49](#_Toc28818)

[IR-SPECTRUM 50](#_Toc2662)

[Figure 3.1: The IR spectrum for compound **14b**. 50](#_Toc20012)

[Figure 3.2: The IR spectrum for compound **13b**. 50](#_Toc28295)

[Figure 3.3: The IR spectrum for compound **11b**. 51](#_Toc11295)

[Figure 2.4: The IR spectrum for compound **12a**. 51](#_Toc12873)

[Figure 3.5: The IR spectrum for compound **12b**. 52](#_Toc21030)

[Figure 3.6: The IR spectrum for compound **20a**. 53](#_Toc19954)

[Figure 3.7: The IR spectrum for compound **20b**. 53](#_Toc12566)

[Figure 3.8: The IR spectrum for compound **19a**. 54](#_Toc2560)

[Figure 3.9: The IR spectrum for compound **19b**. 54](#_Toc9842)

[Figure 3.10: The IR spectrum for compound **18b**. 55](#_Toc4351)

[Figure 3.11: The IR spectrum for compound **16b**. 55](#_Toc12636)

NMR SPECTRUM


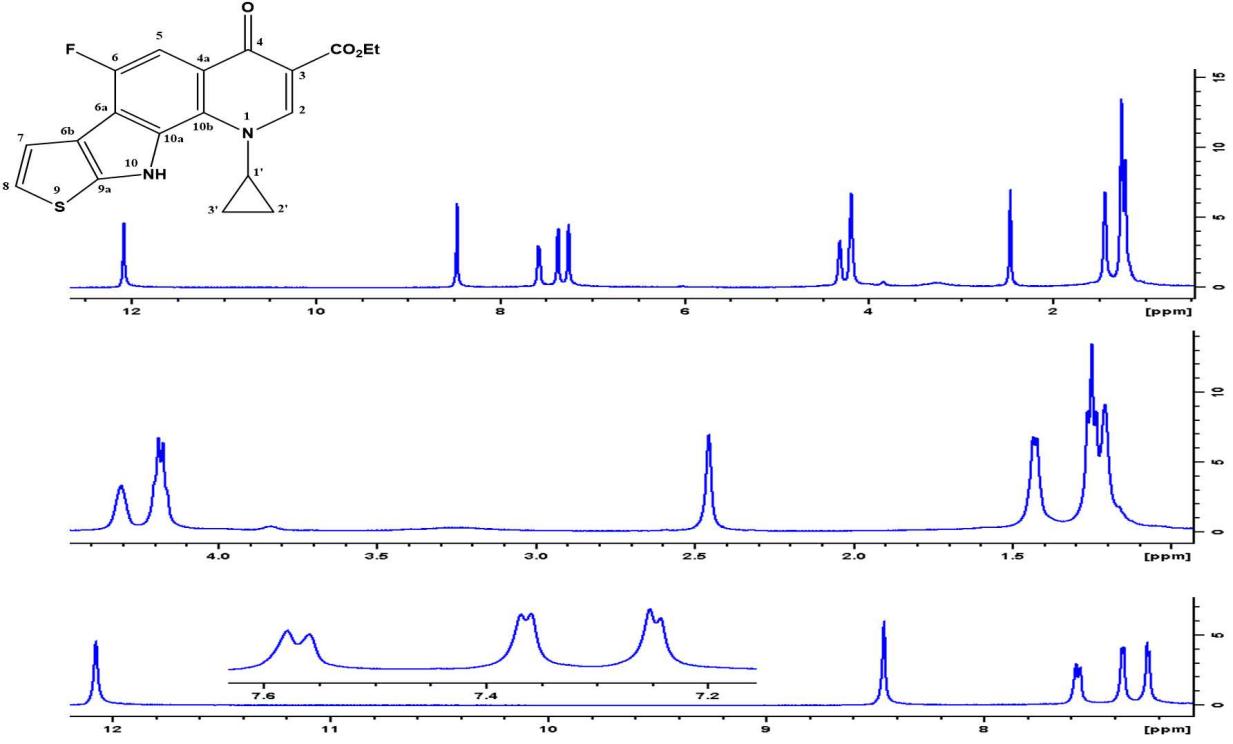


## Figure 1.1: The 1H-NMR spectrum of compound 12a (DMSO-d6).


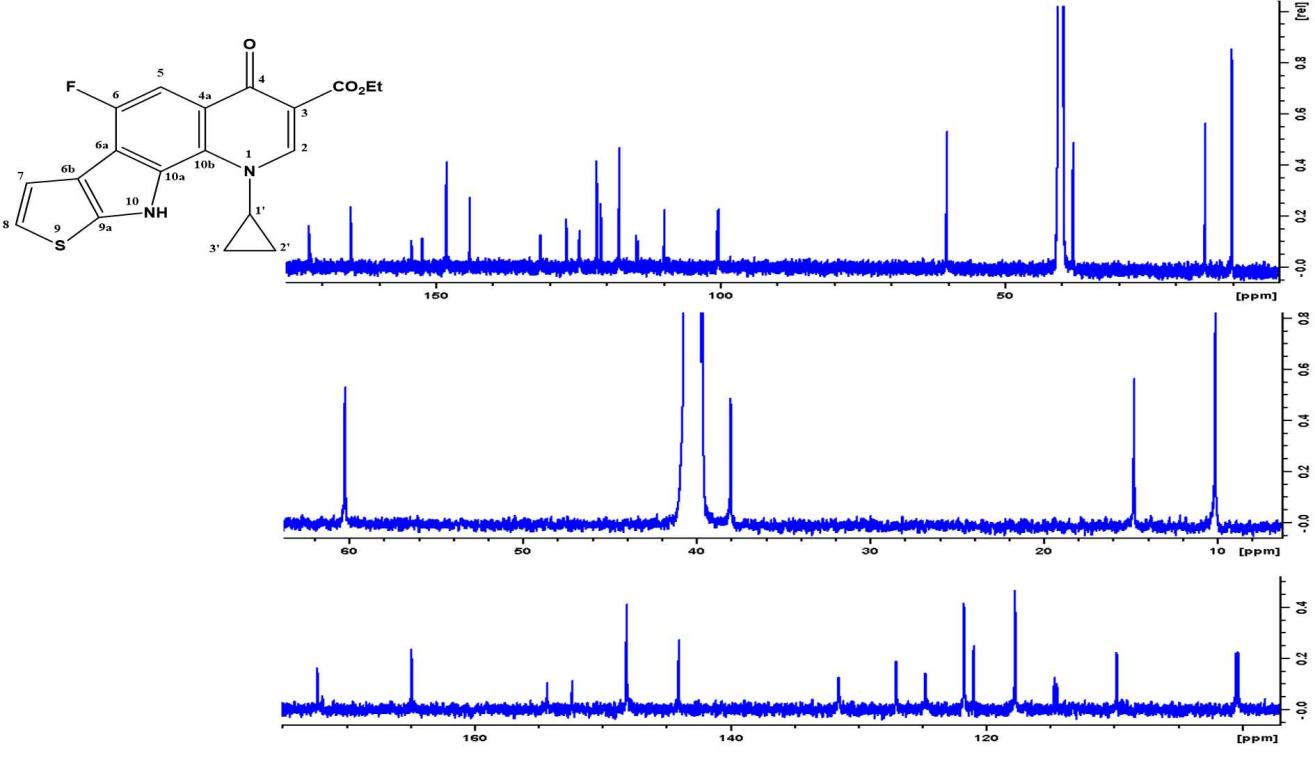


## Figure 1.2: The 13C-NMR spectrum of compound 12a (DMSO-d6).


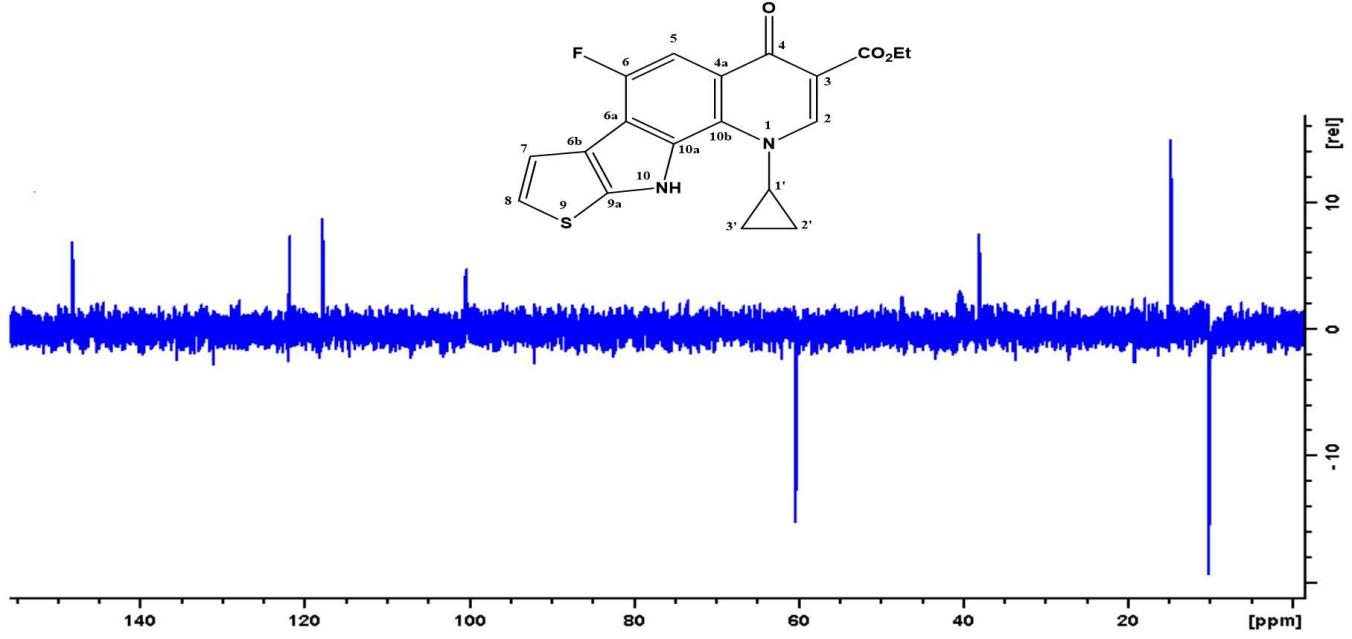


## Figure 1.3: The DEPT (135) spectrum of compound 12a (DMSO-d6).


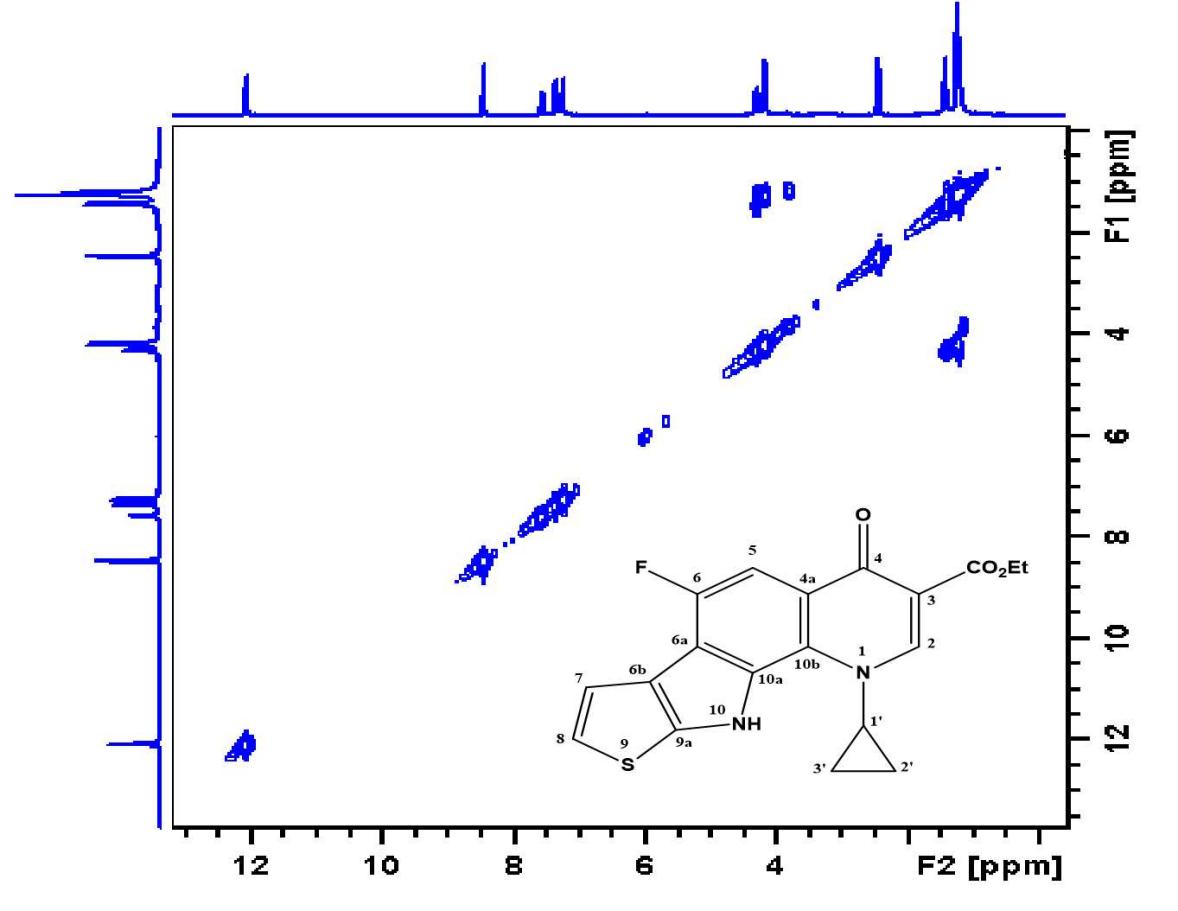


## Figure 1.4: The COSY spectrum of compound 12a (DMSO-d6).


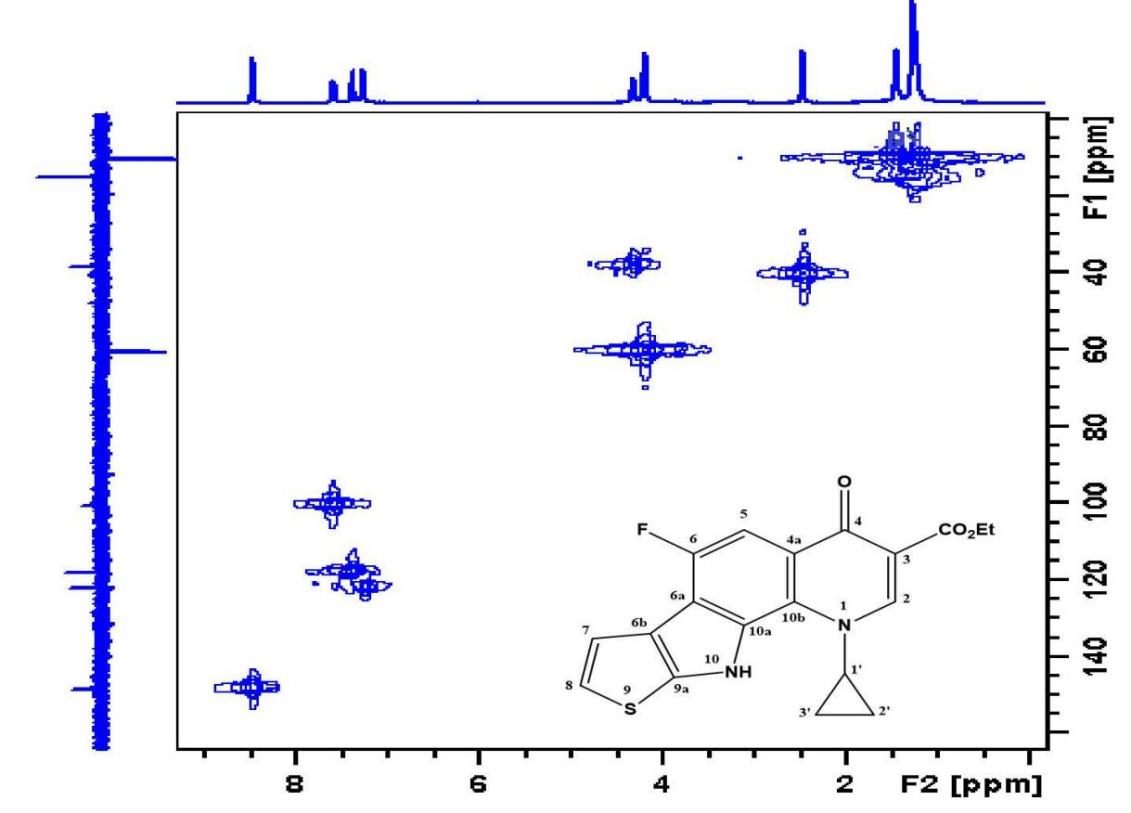


## Figure 1.5: The HMQC spectrum of compound 12a (DMSO-d6).


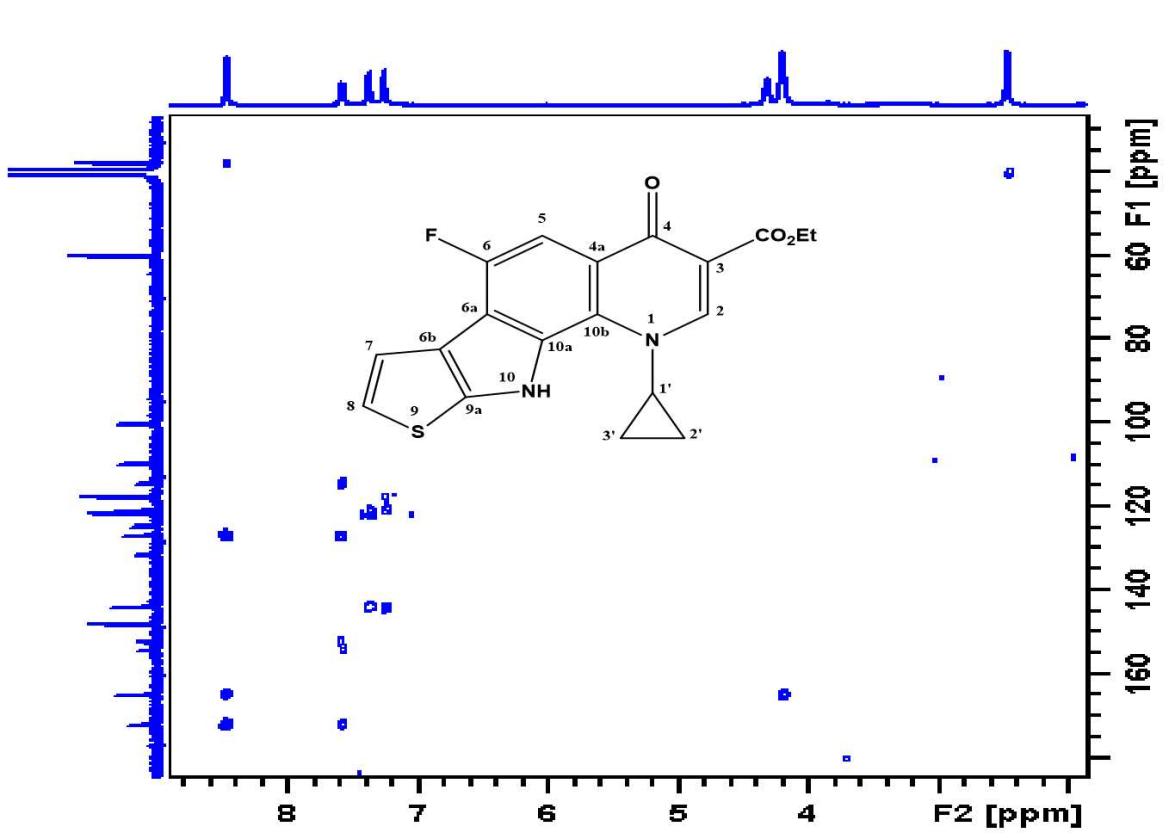


## Figure 1.6: The HMBC spectrum of compound 12a (DMSO-d6).


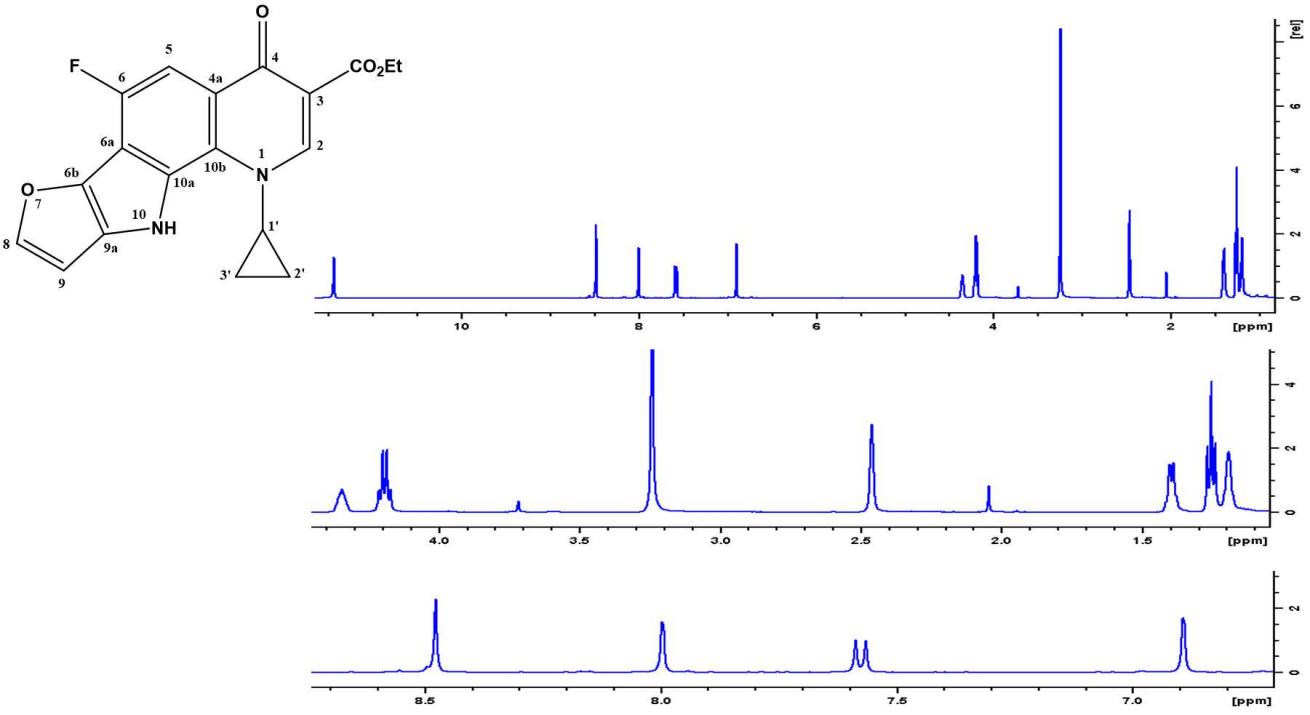


## Figure 1.7: The 1H-NMR spectrum of compound 15a (DMSO-d6).


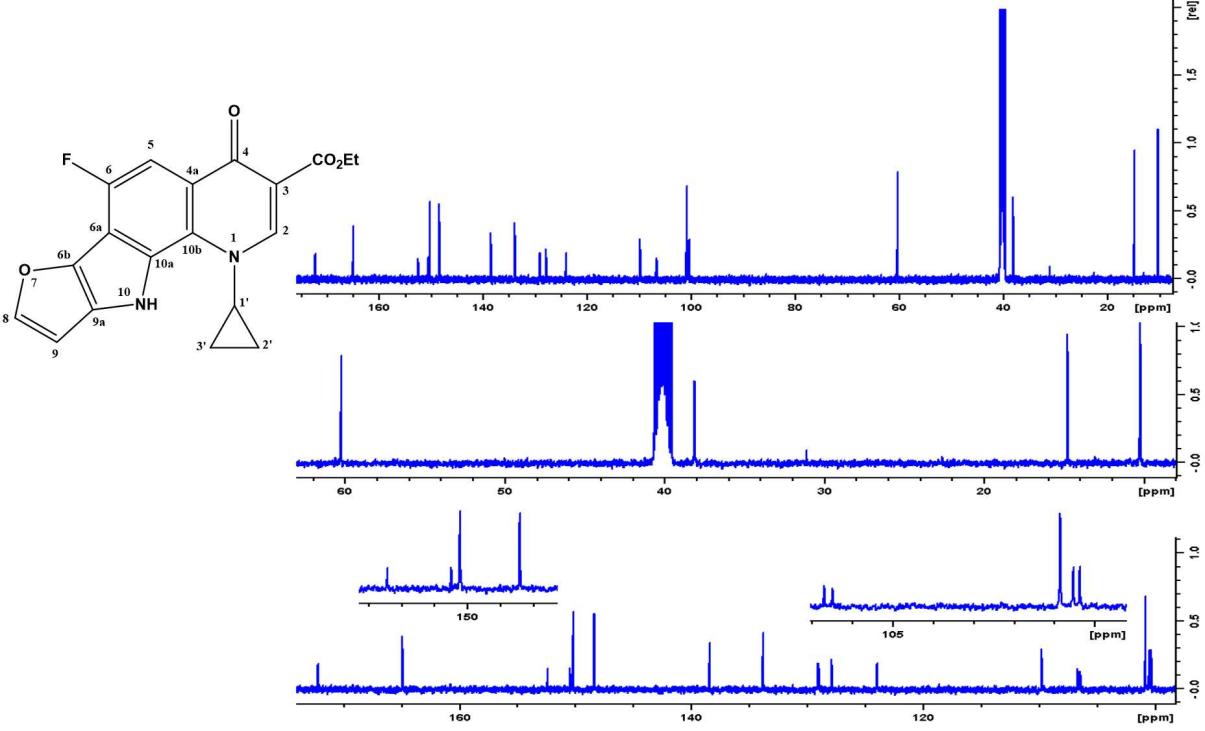


## Figure 1.8: The 13C-NMR spectrum of compound 15a (DMSO-d6).


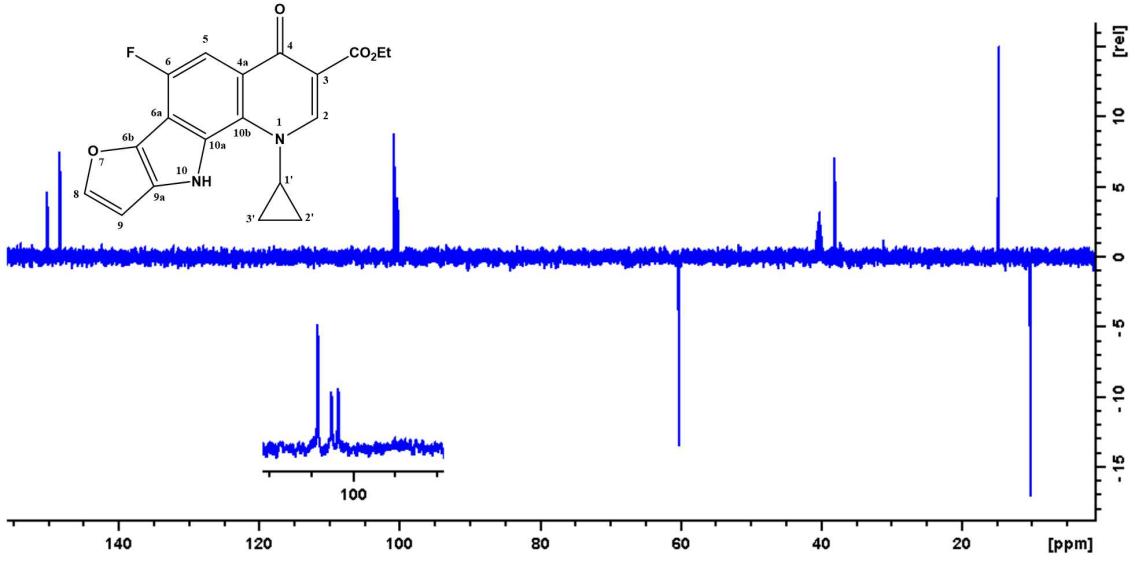


## Figure 1.9: The DEPT (135) spectrum of compound 15a (DMSO-d6).


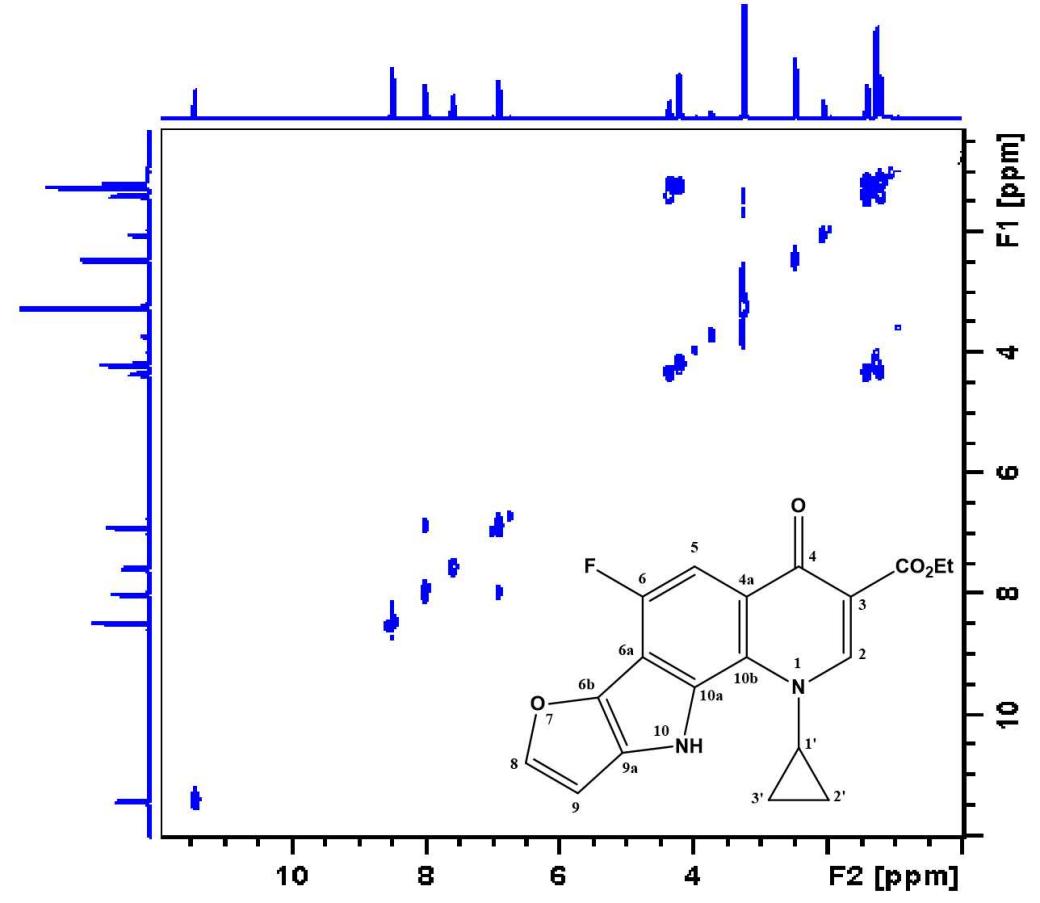


## Figure 1.10: The COSY spectrum of compound 15a(DMSO-d6).


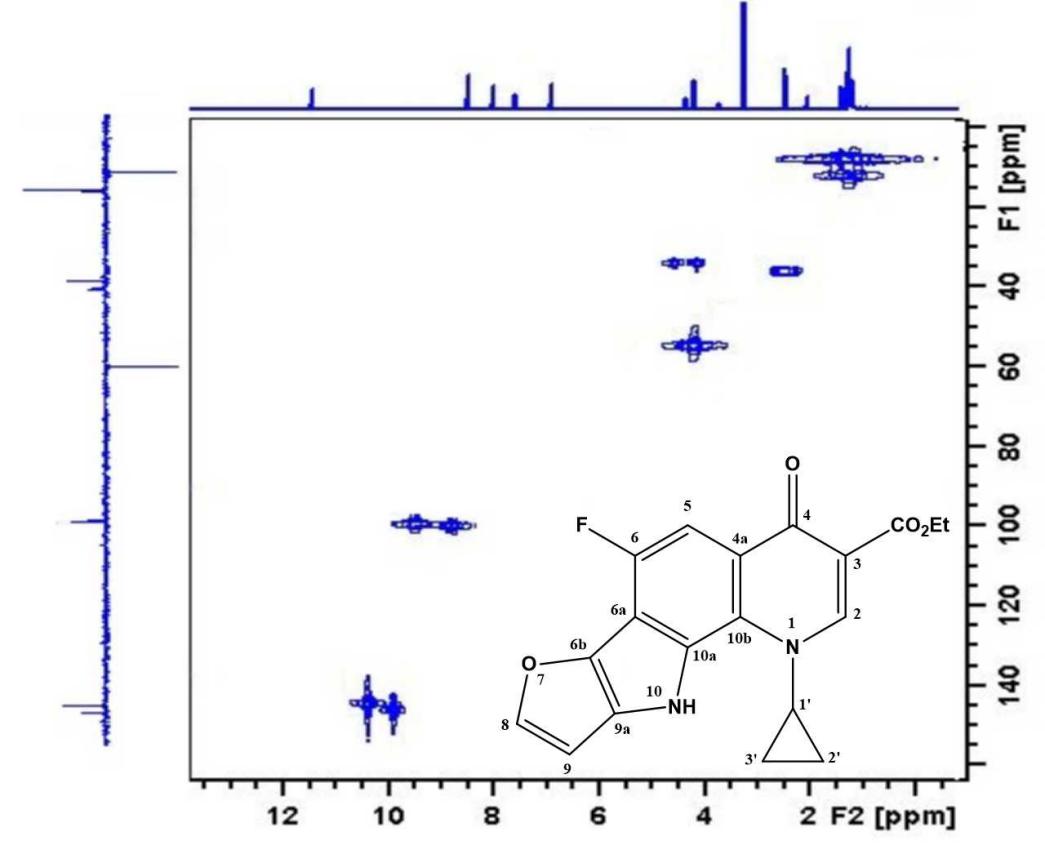


## Figure 1.11: The HMQC spectrum of compound 15a (DMSO-d6).


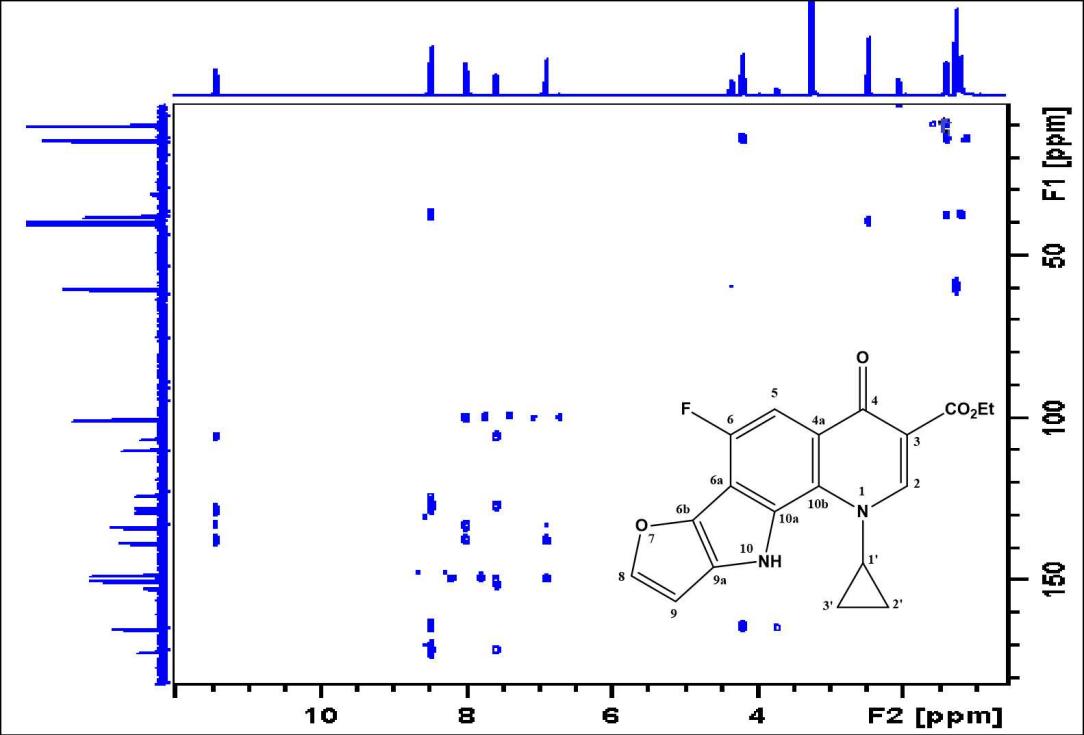


## Figure 1.12: The HMBC spectrum of compound 15a (DMSO-d6).


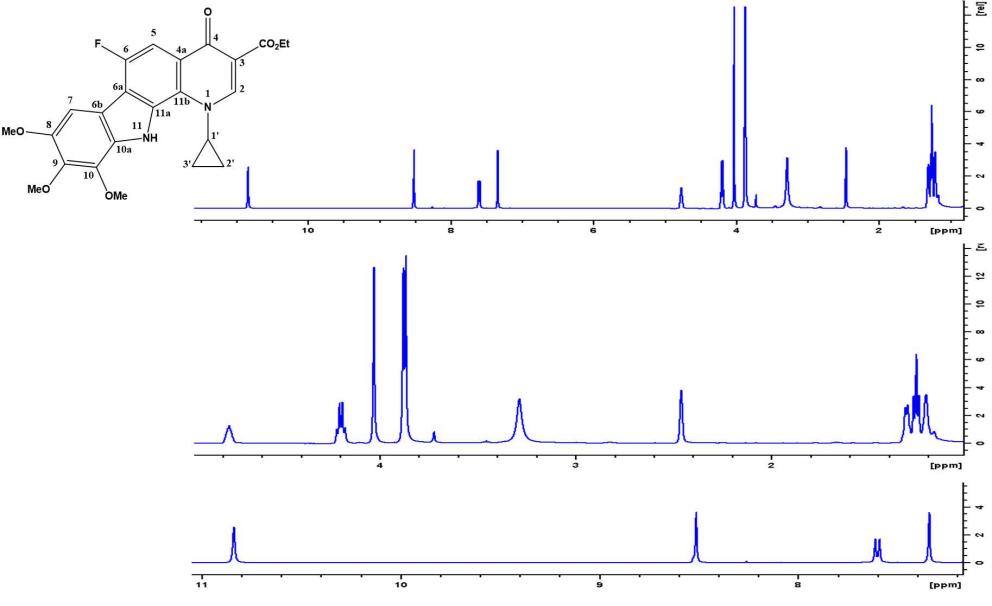


## Figure 1.13: The 1H-NMR spectrum of compound 19a (DMSO-d6).


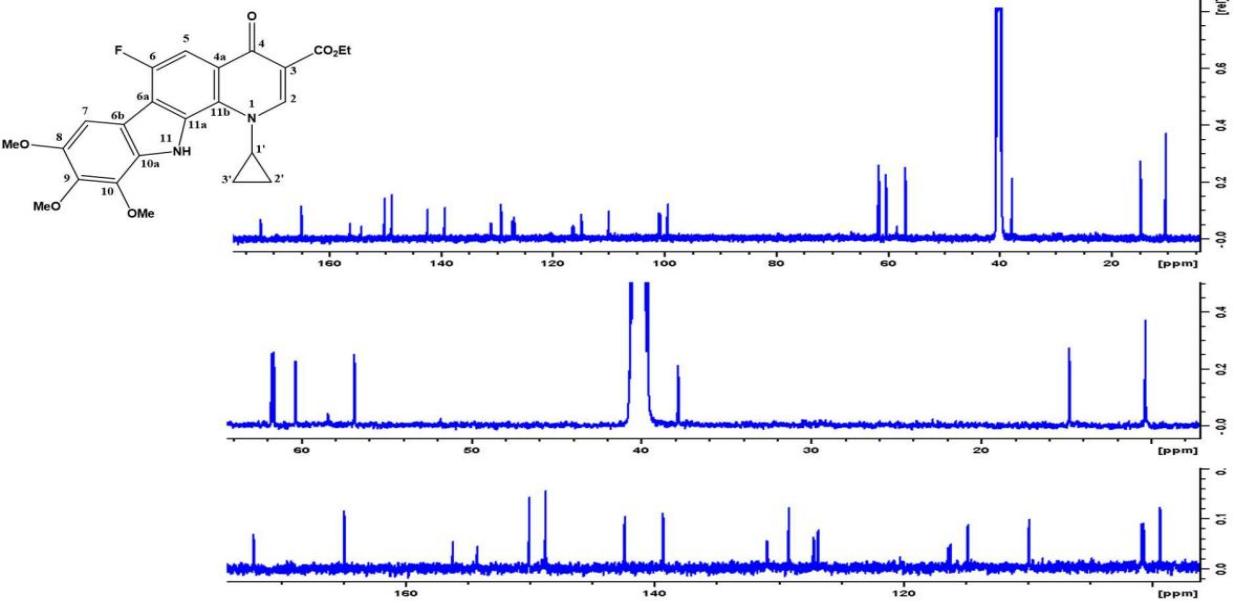


## Figure 1.14: The 13C-NMR spectrum of compound 19a (DMSO-d6).


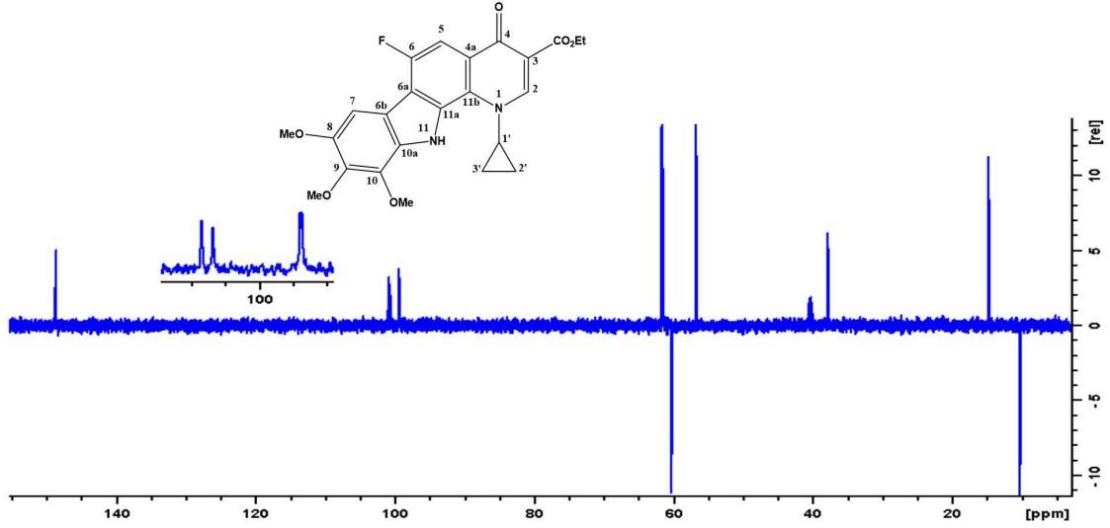


## Figure 1.15: The DEPT (135) spectrum of compound 19a (DMSO-d6).


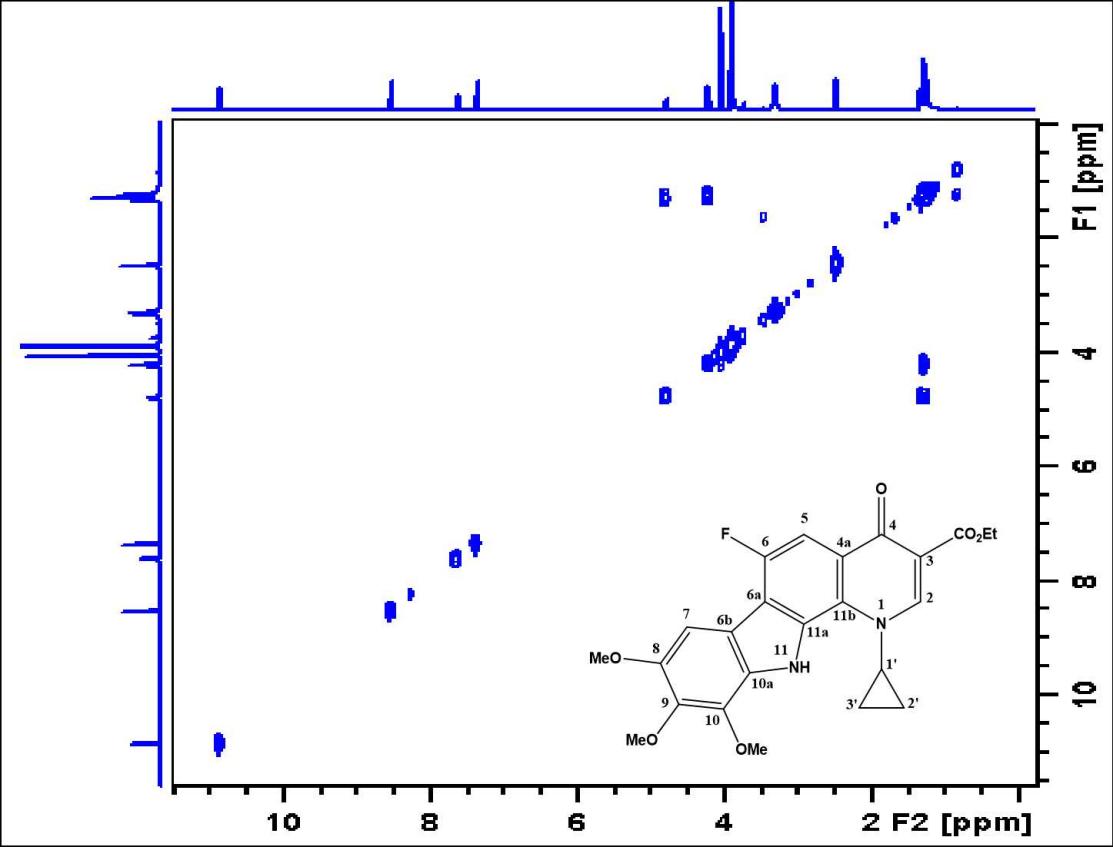


## Figure 1.16: The COSY spectrum of compound 19a (DMSO-d6).


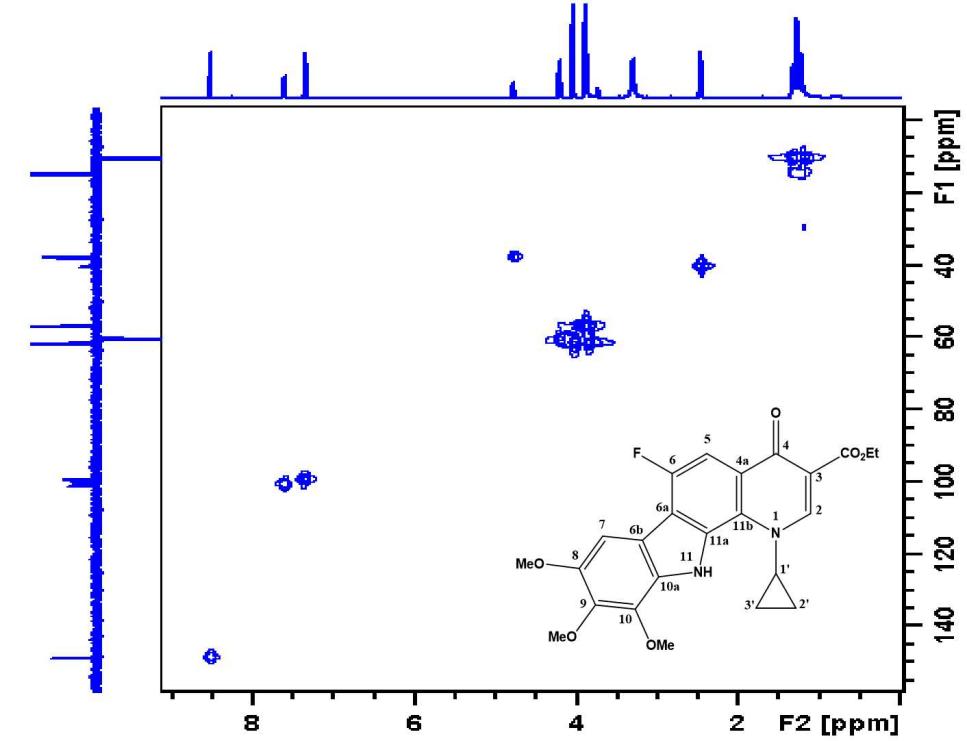


## Figure 1.17: The HMQC spectrum of compound 19a (DMSO-d6).


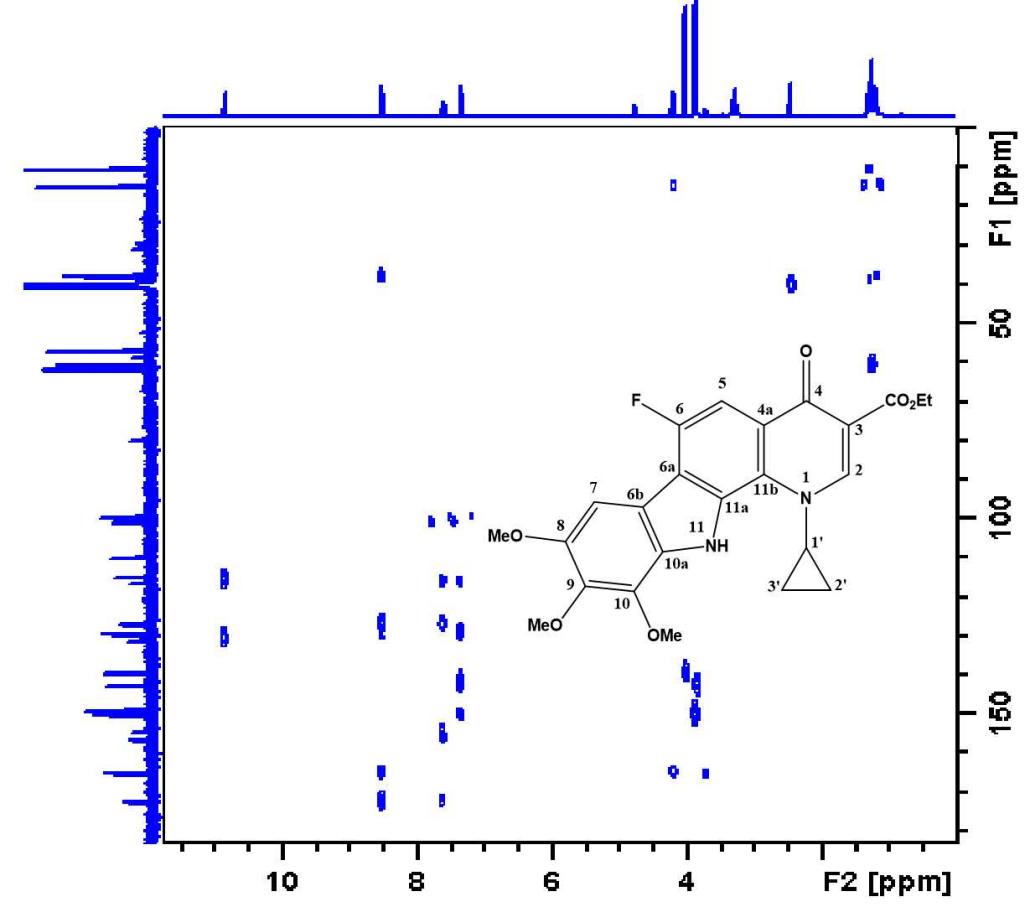


## Figure 1.18: The HMBC spectrum of compound 19a (DMSO-d6).


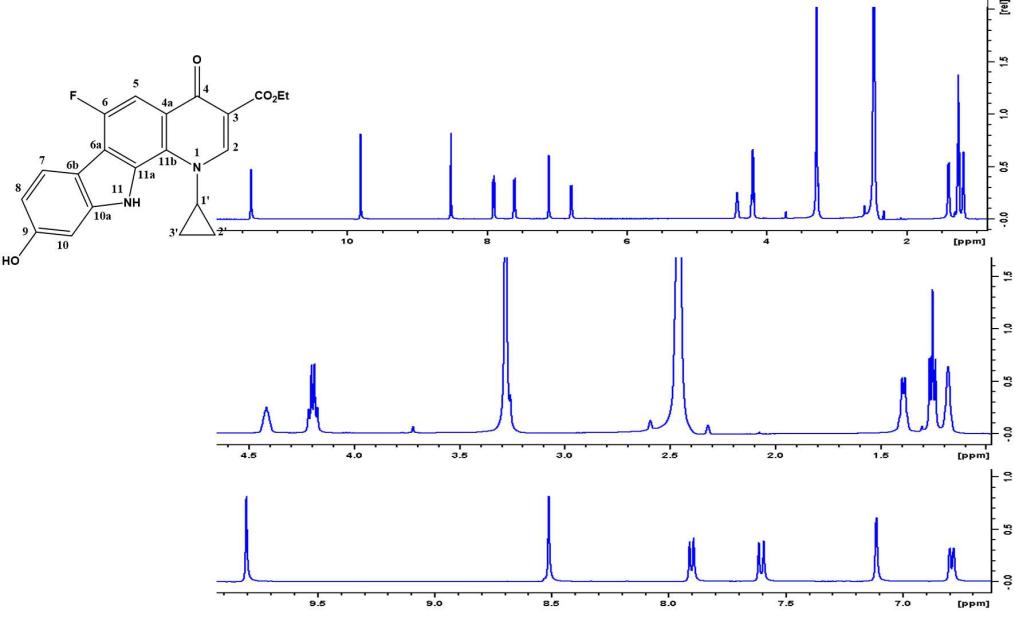


## Figure 1.19: The 1H-NMR spectrum of compound 20a (DMSO-d6).


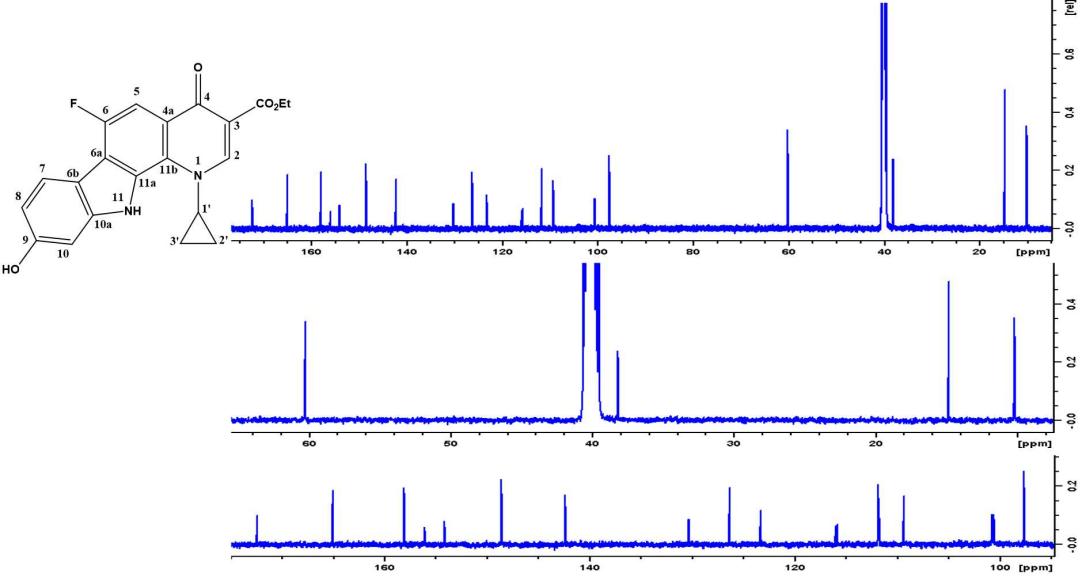


## Figure 1.20: The 13C-NMR spectrum of compound 20a (DMSO-d6).


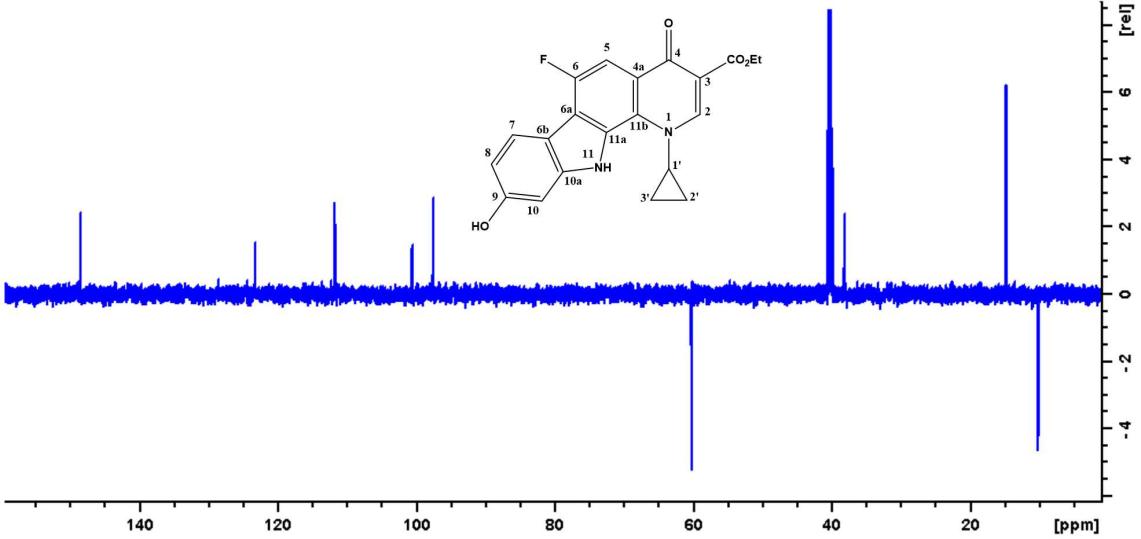
 Figure 1.21: The Dept (135) spectrum of compound 20a (DMSO-d6)

.
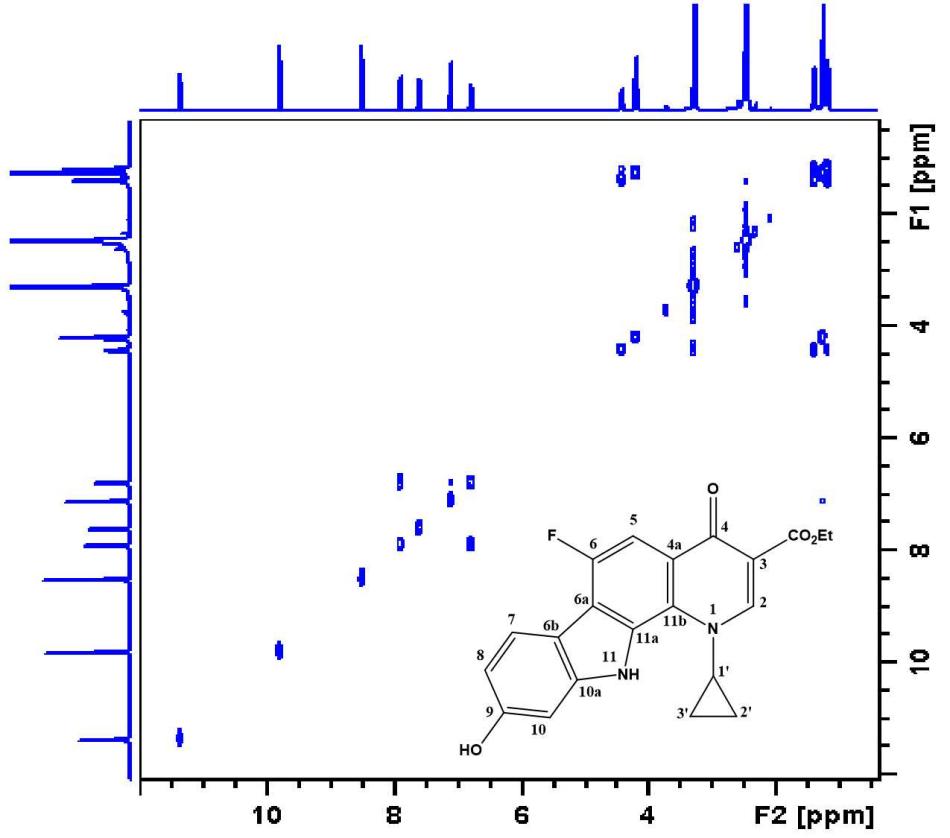
 Figure 1.22: The COSY spectrum of compound 20a (DMSO-d6).


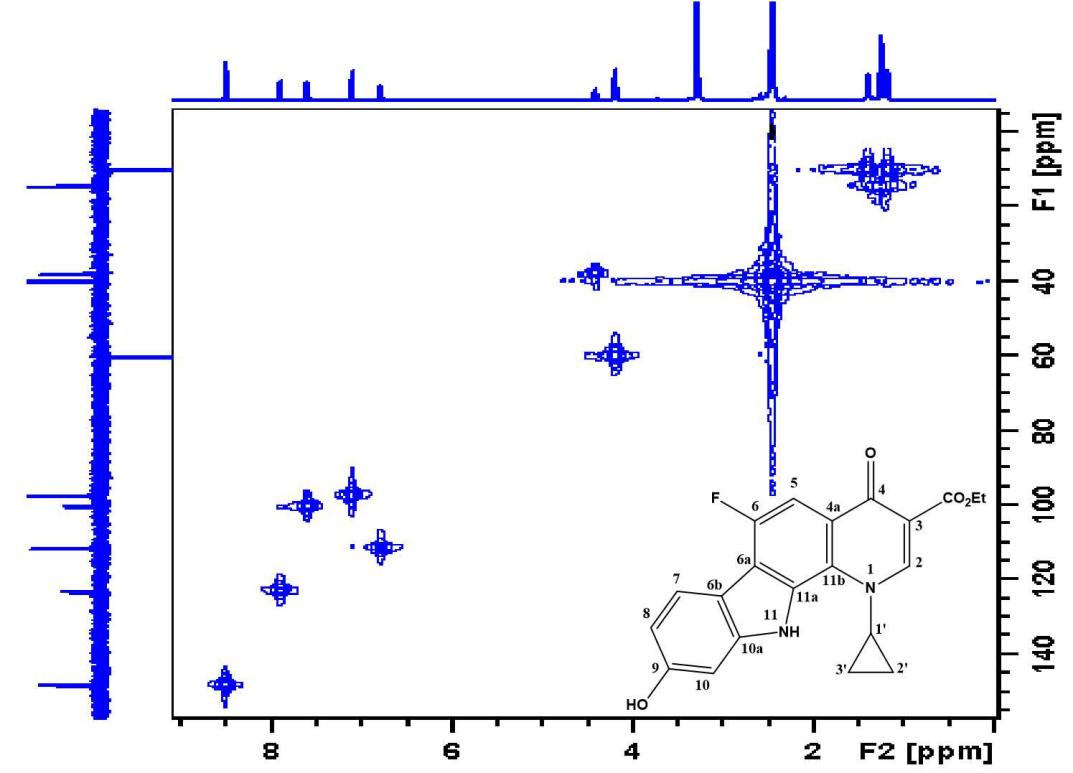


## Figure 1.23: The HMQC spectrum of compound 20a (DMSO-d6).


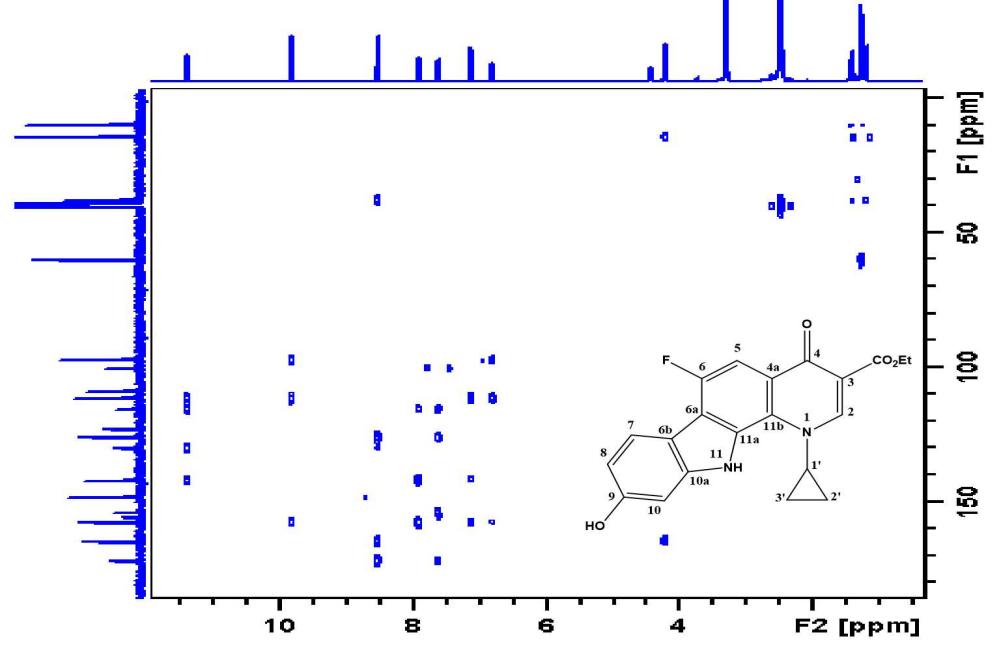


## Figure 1.24: The HMBC spectrum of compound20a (DMSO-d6).

**
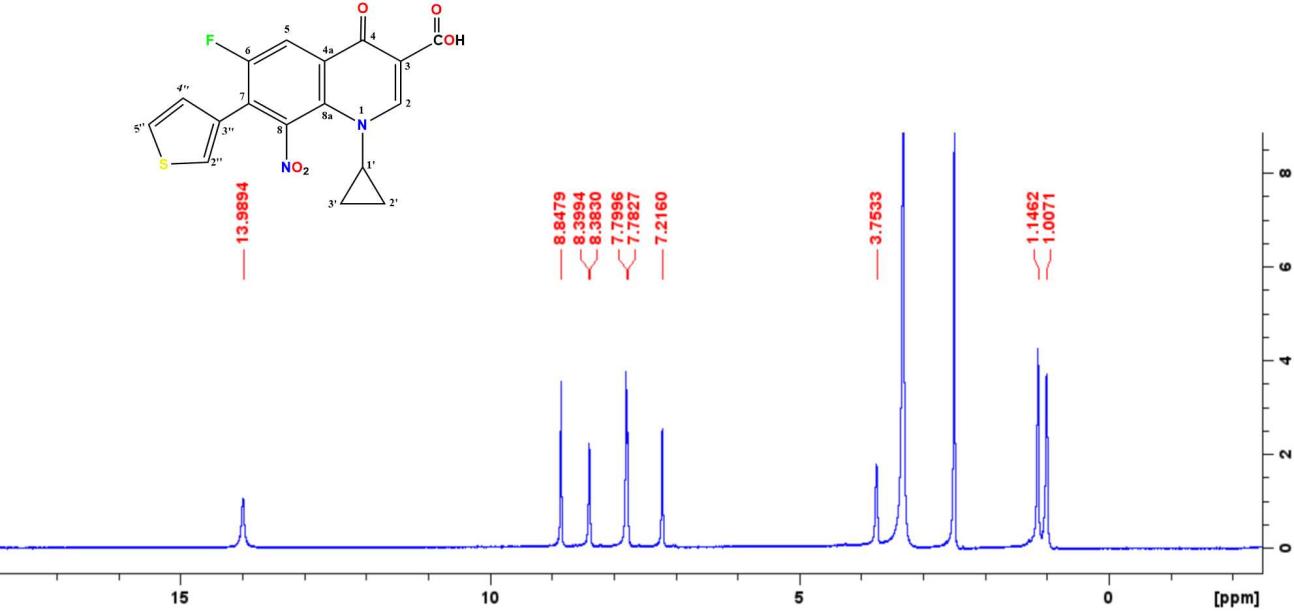
**

## Figure 1.25: The 1H-NMR spectrum of compound 11b (DMSO-d6).


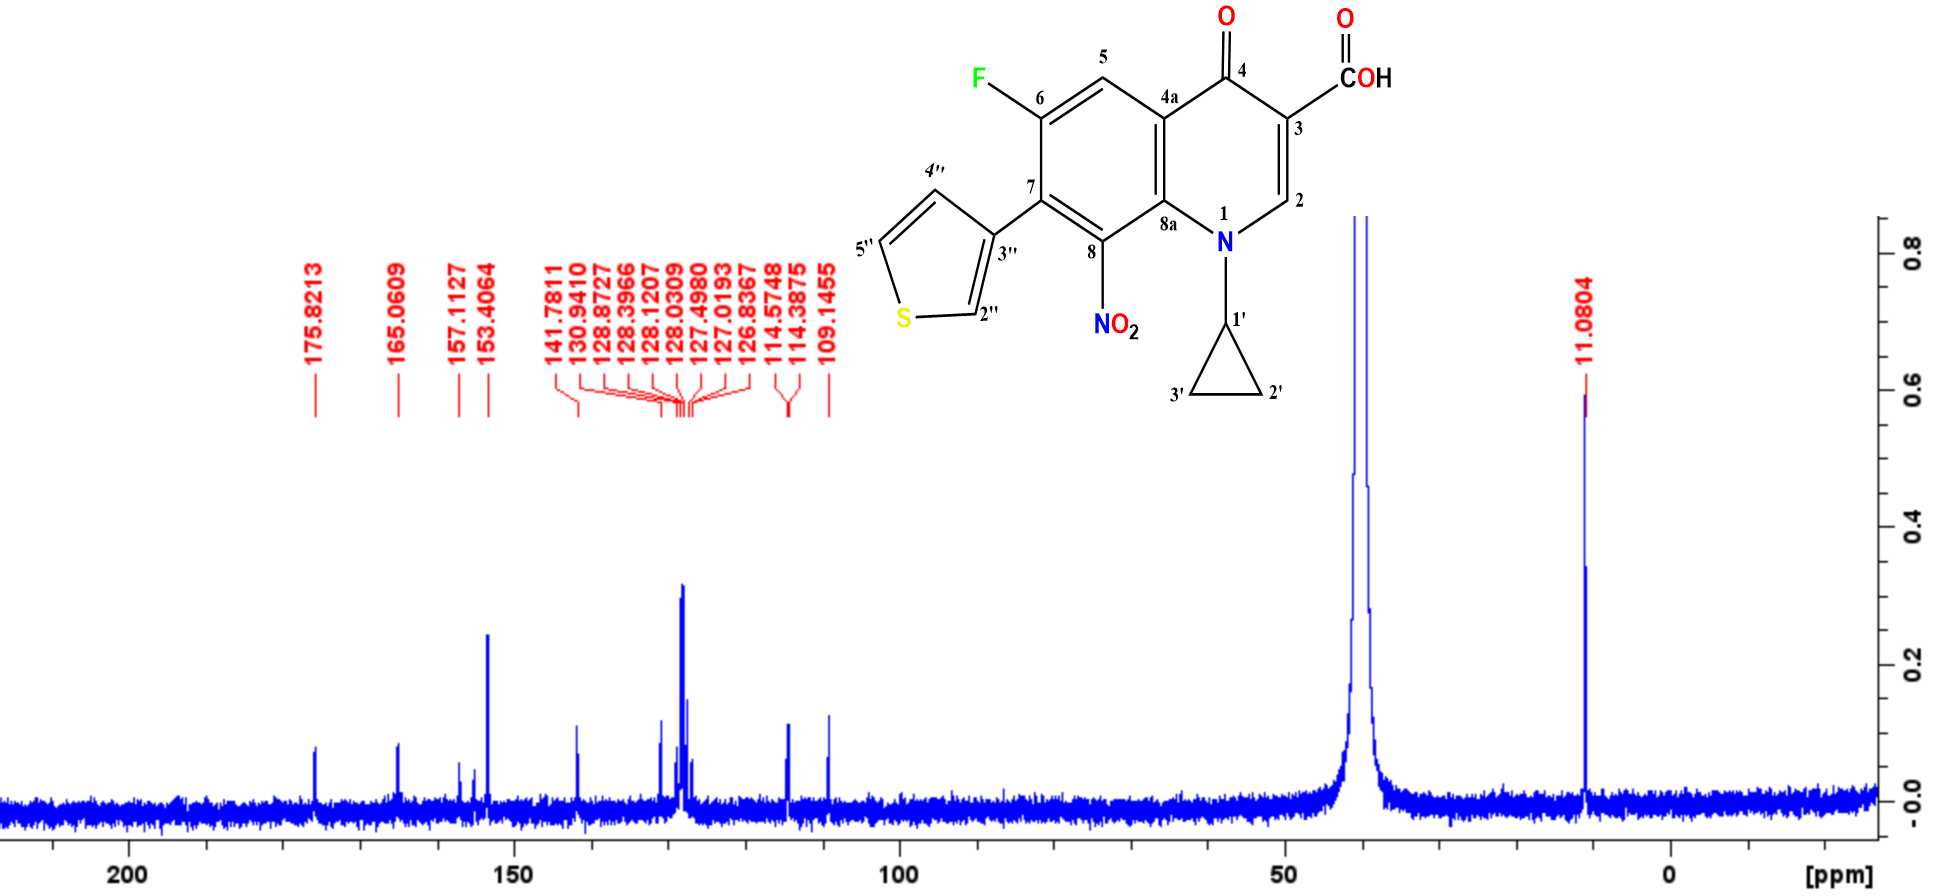


## Figure 1.26: The 13C-NMR spectrum of compound 11b (DMSO-d6).


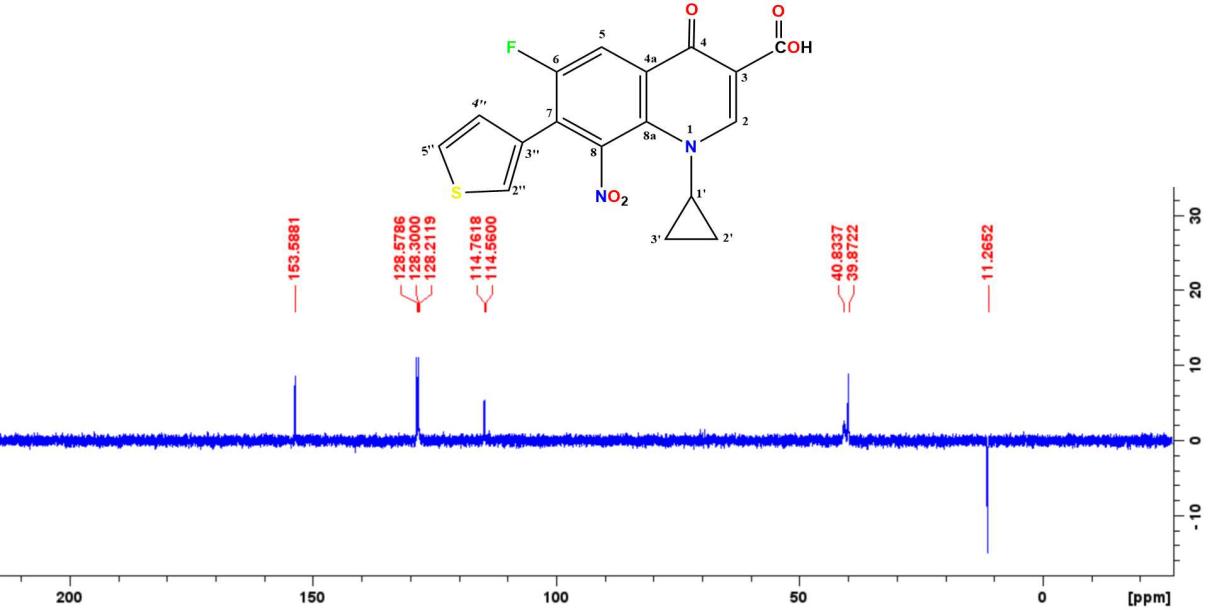


## Figure 1.27: The DEPT (135) spectrum of compound 11b (DMSO-d6).


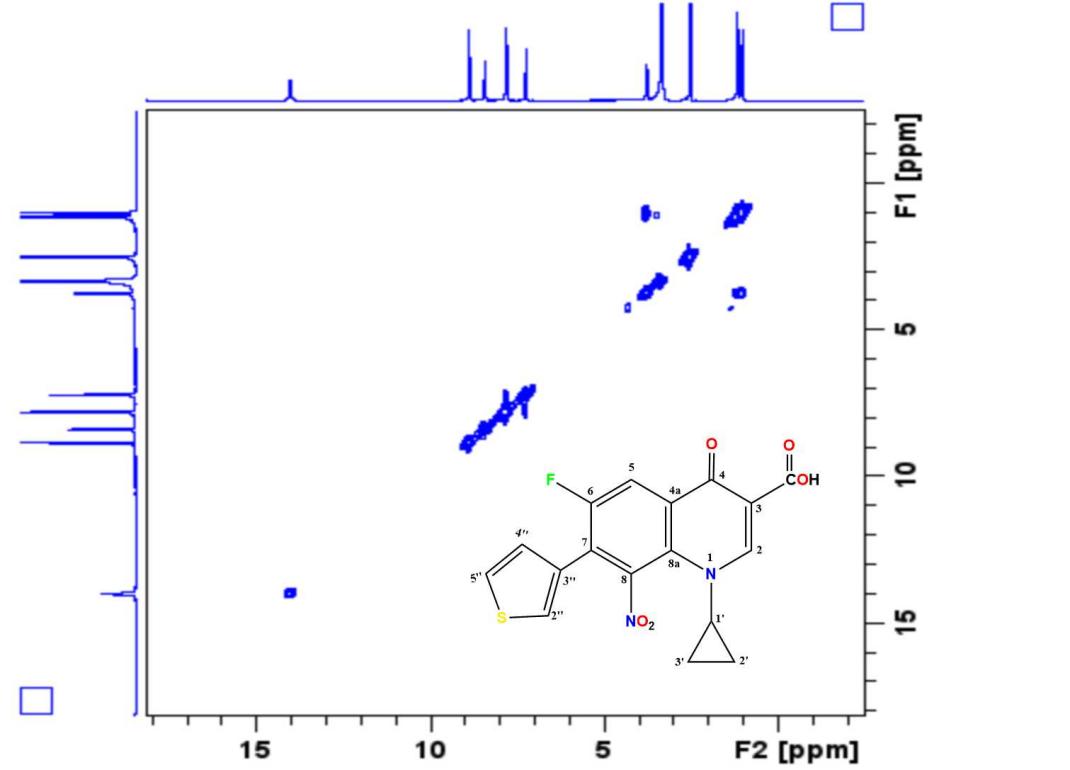


## Figure 1.28: The COSY spectrum of compound 11b (DMSO-d6).


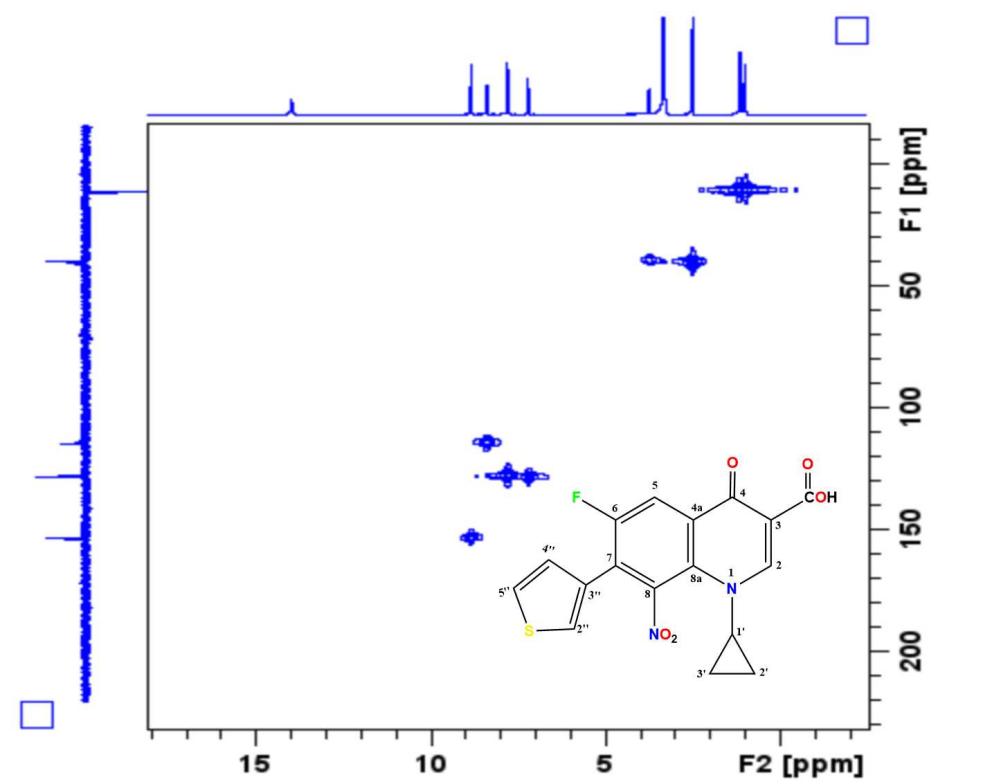


## Figure 1.29: The HMQC spectrum of compound 11b (DMSO-d6).


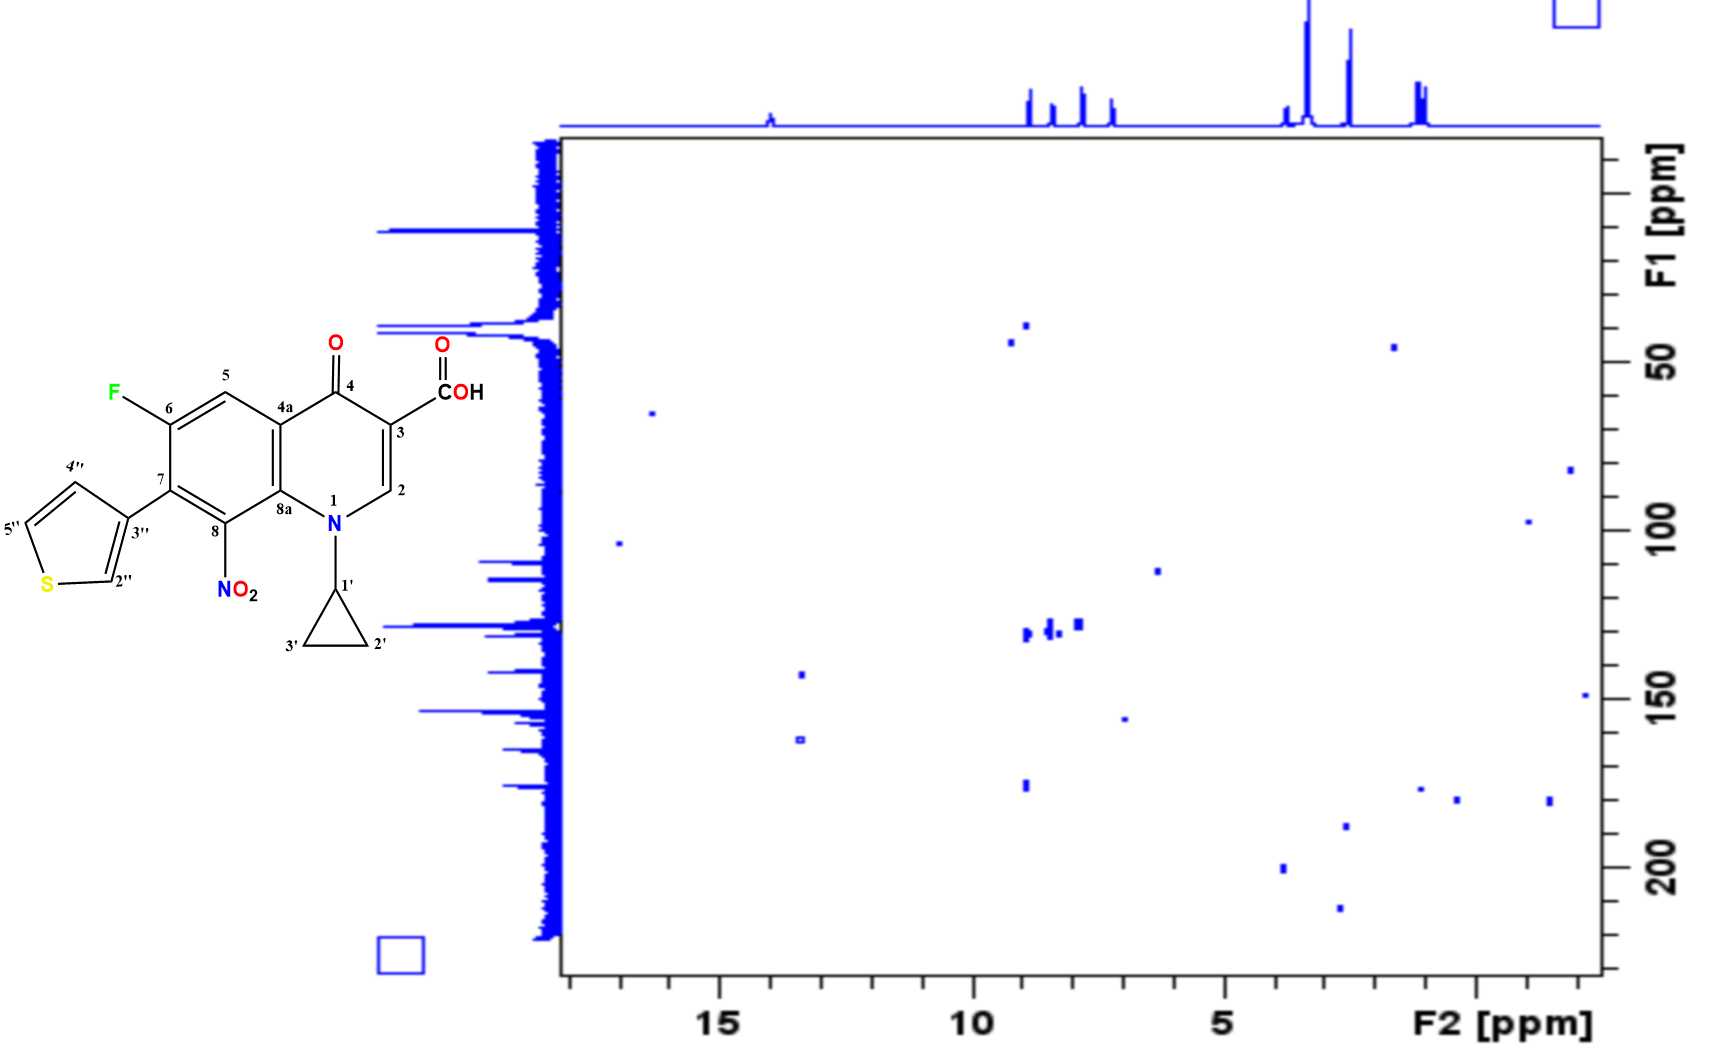


## Figure 1.30: The HMBC spectrum of compound 11b(DMSO-d6).


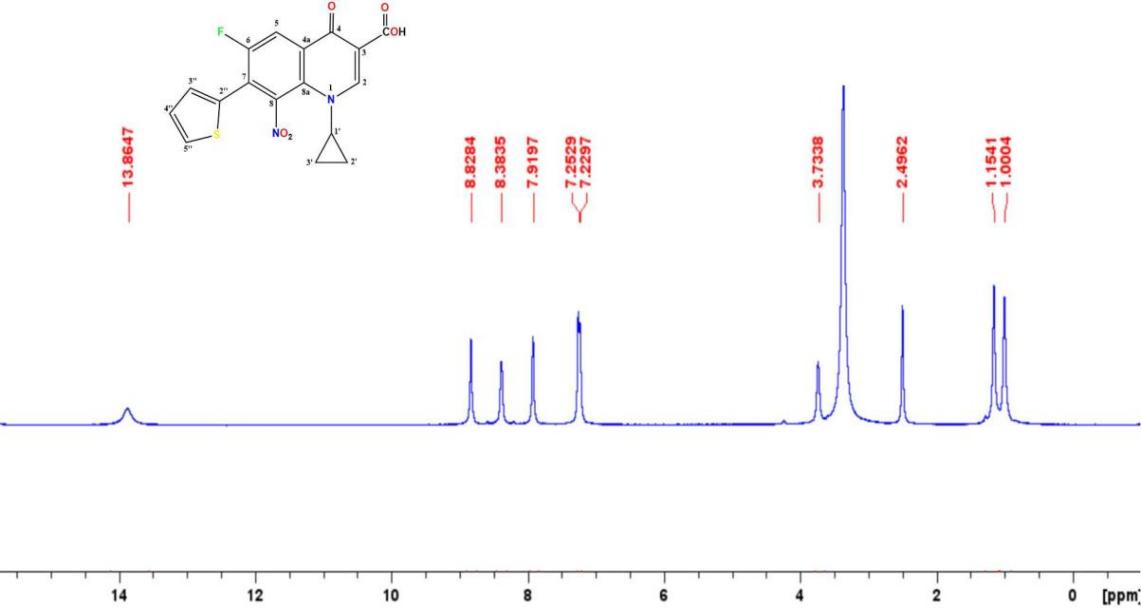
 Figure 1.31: The 1H-NMR spectrum of compound 13b (DMSO-d6)


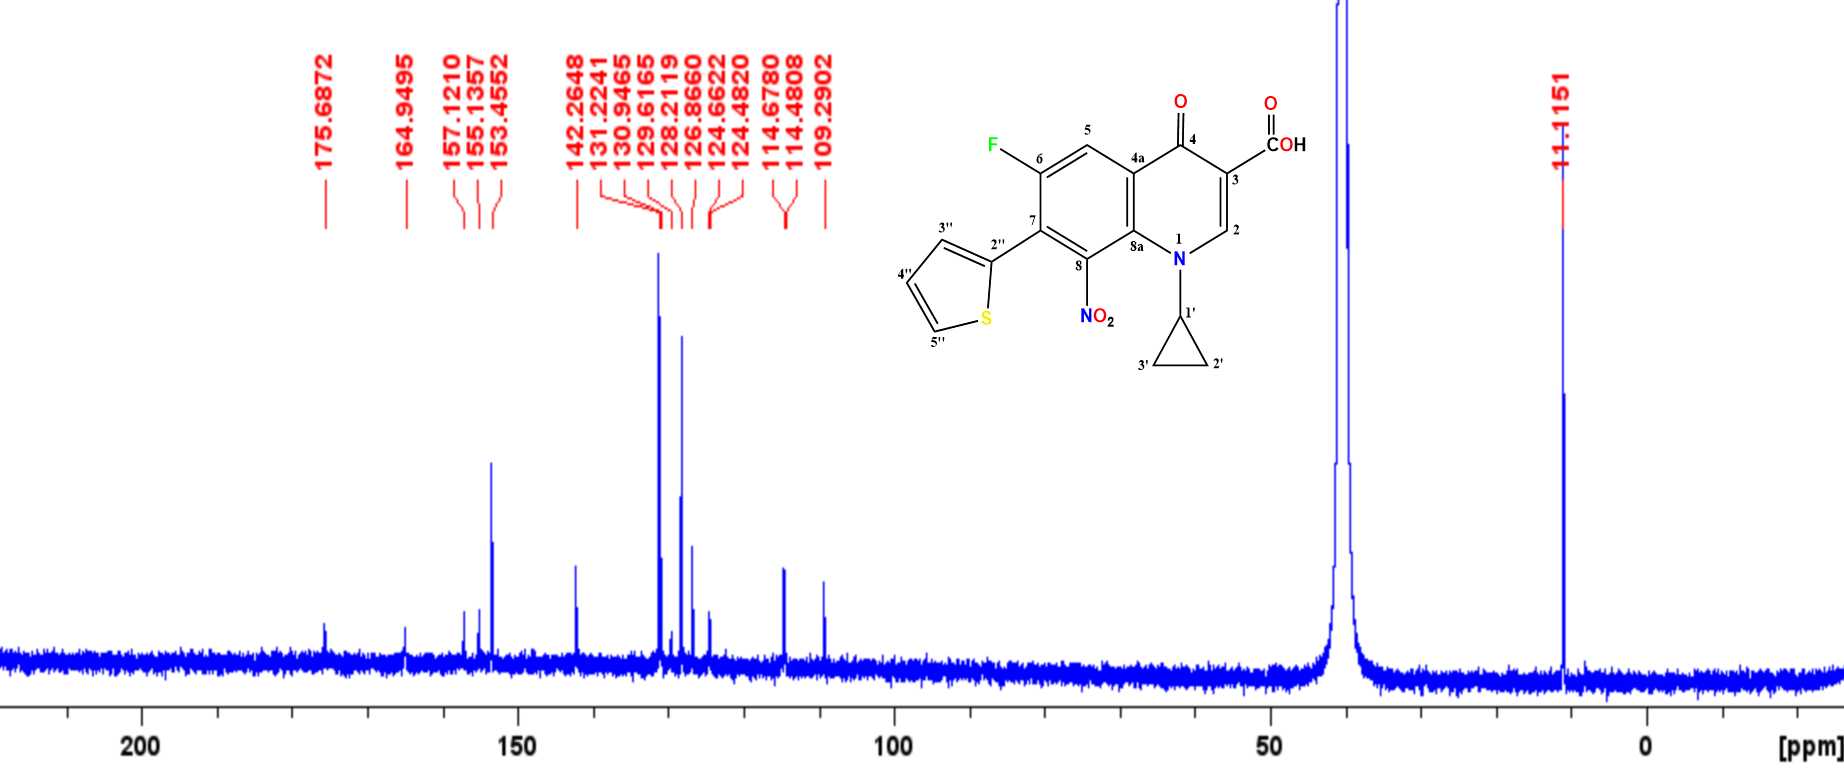
 Figure 1.32: The 13C-NMR spectrum of compound 13b (DMSO-d6).


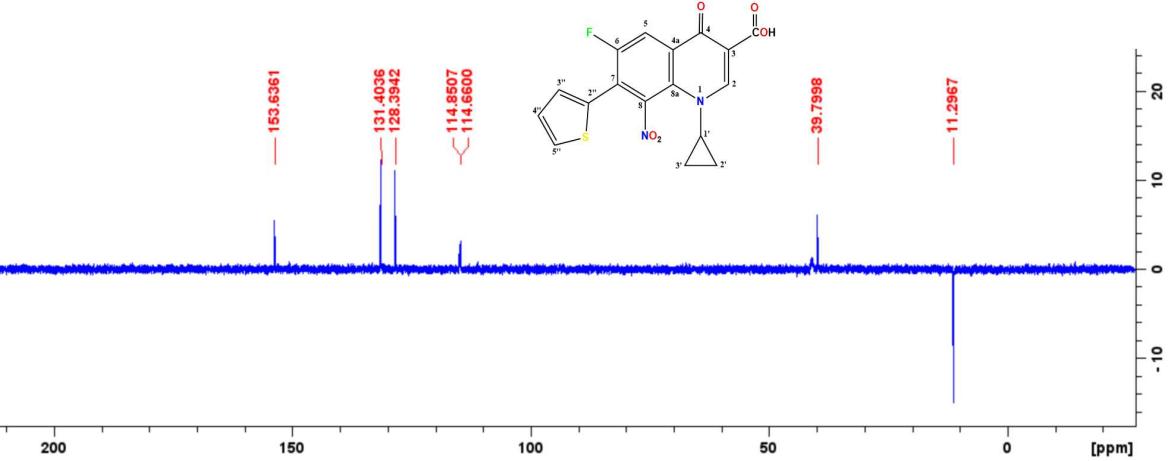


## Figure 1.33: The DEPT (135) spectrum of compound 13b (DMSO-d6).


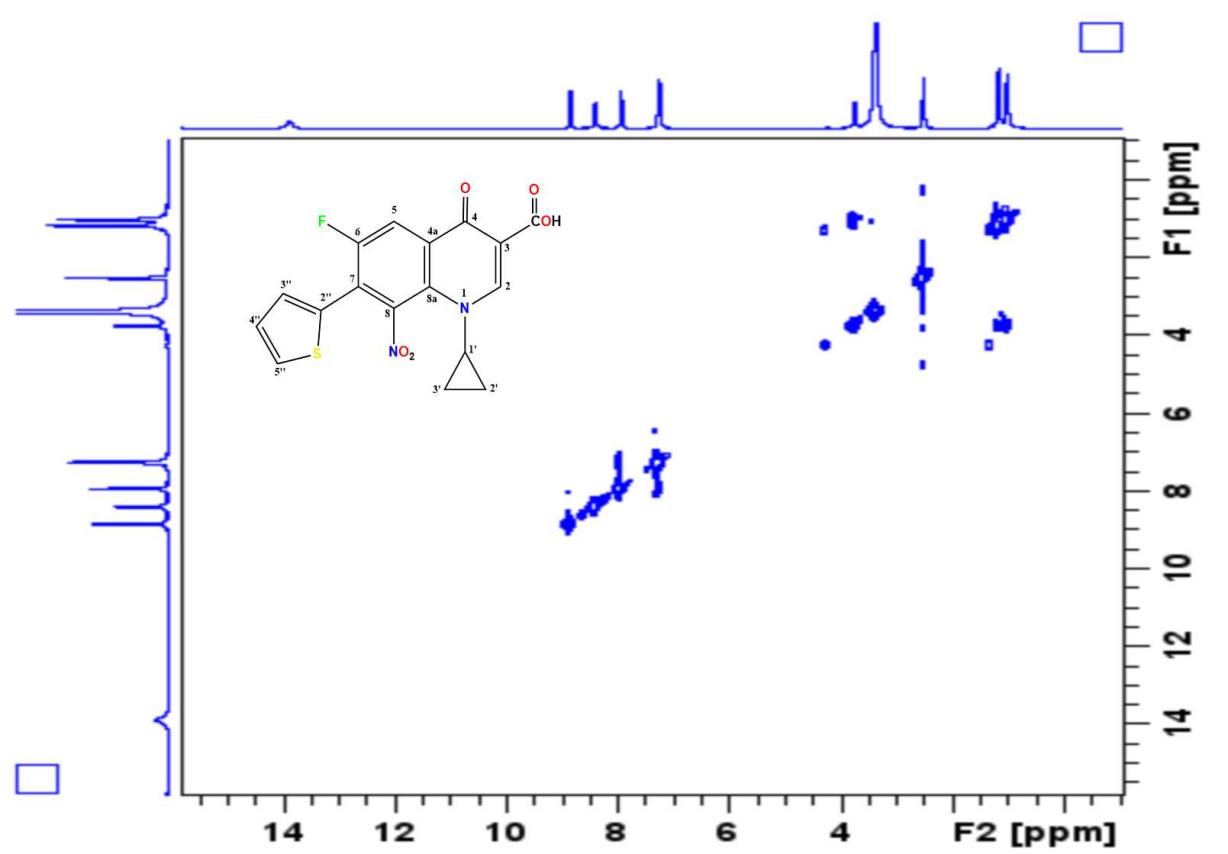


## Figure 1.34: The COSY spectrum of compound 13b (DMSO-d6).


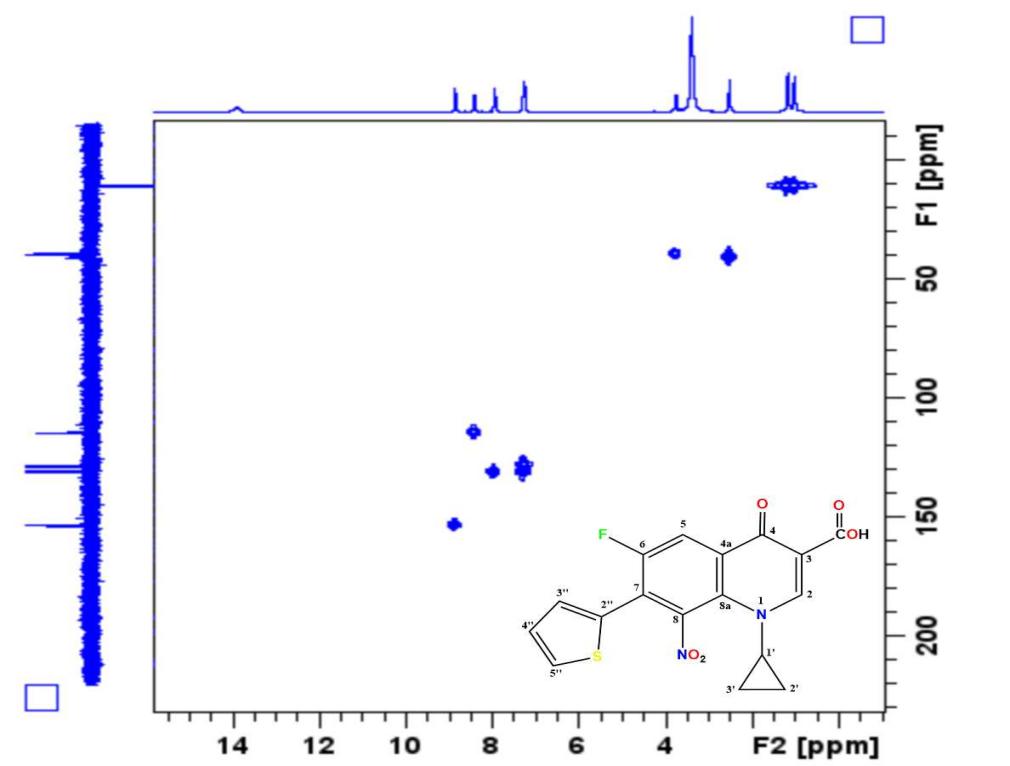


## Figure 1.35: The HMQC spectrum of compound 13b (DMSO-d6).


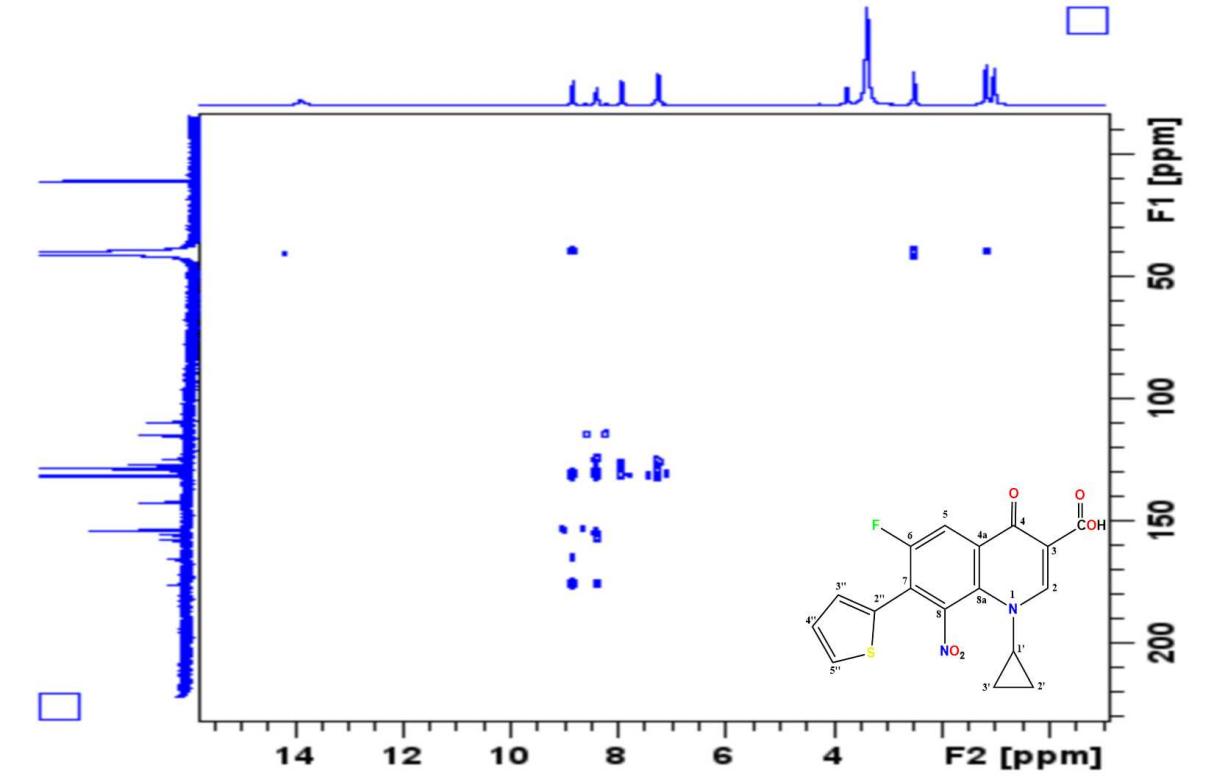


## Figure 1.36: The HMBC spectrum of compound 13b (DMSO-d6).


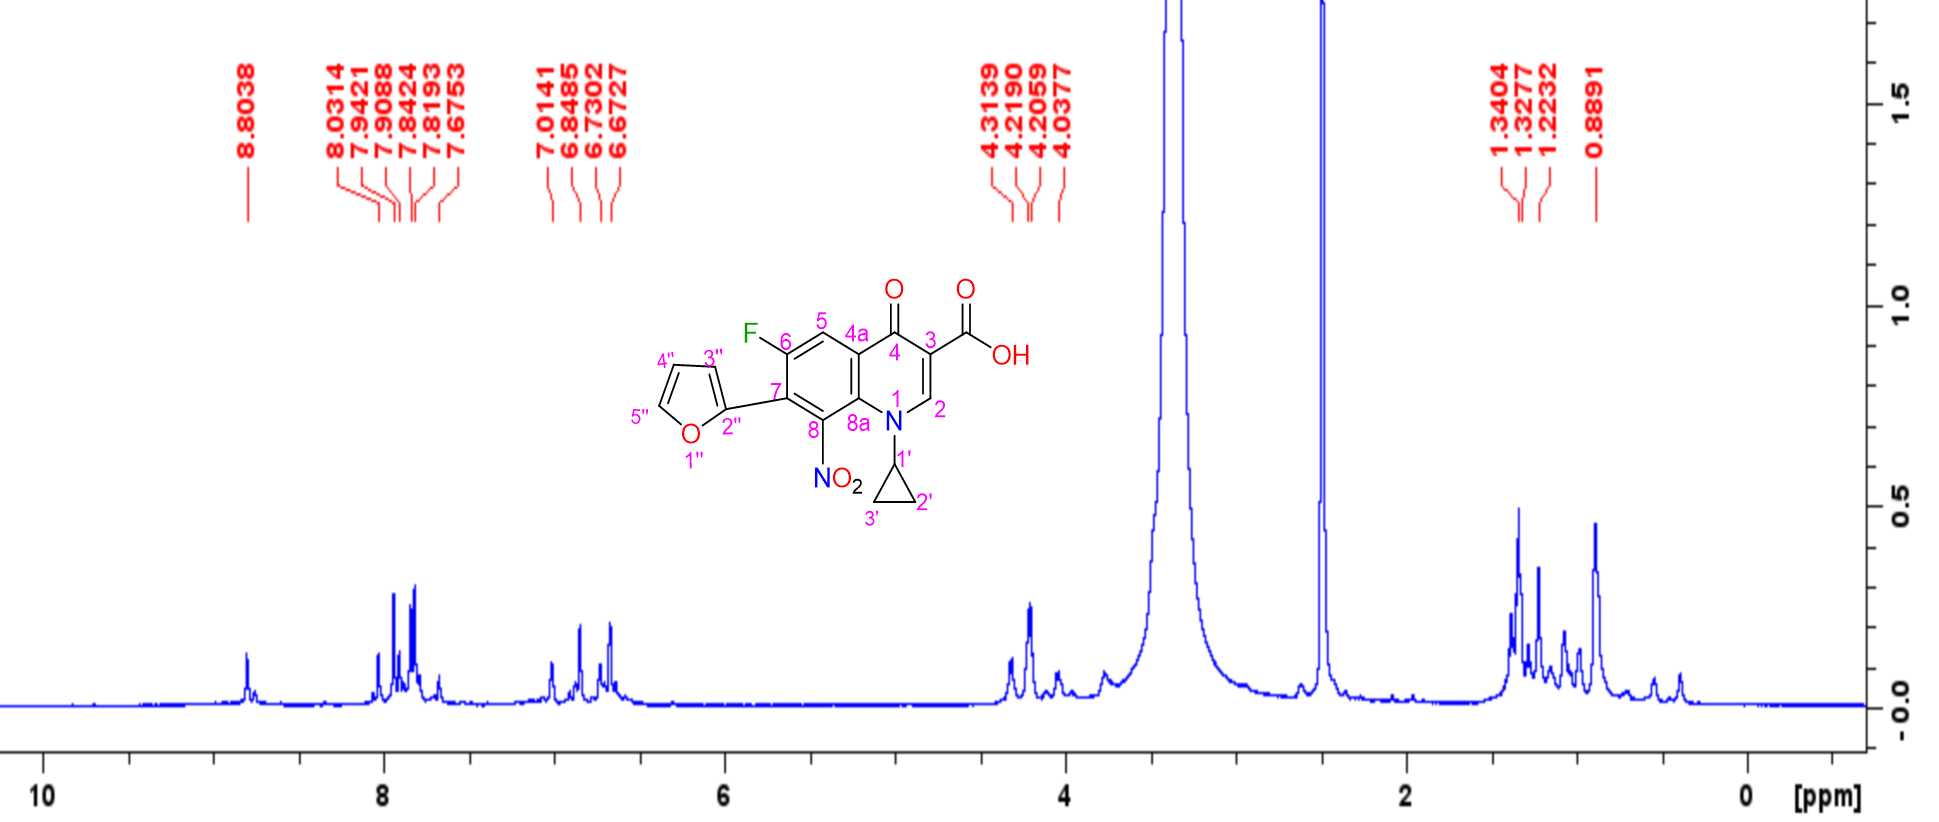
Figure 1.37: The 1H-NMR spectrum of compound 14b (DMSO-d6)


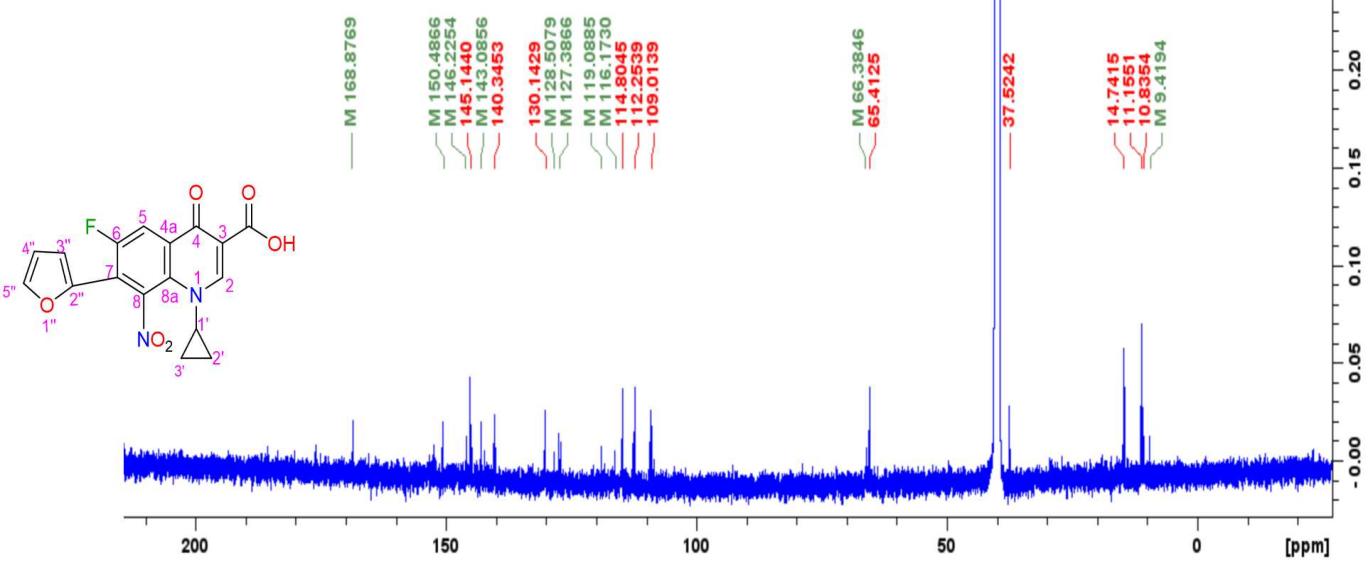
 Figure 1.38: The 13C-NMR spectrum of compound 14bb (DMSO-d6).


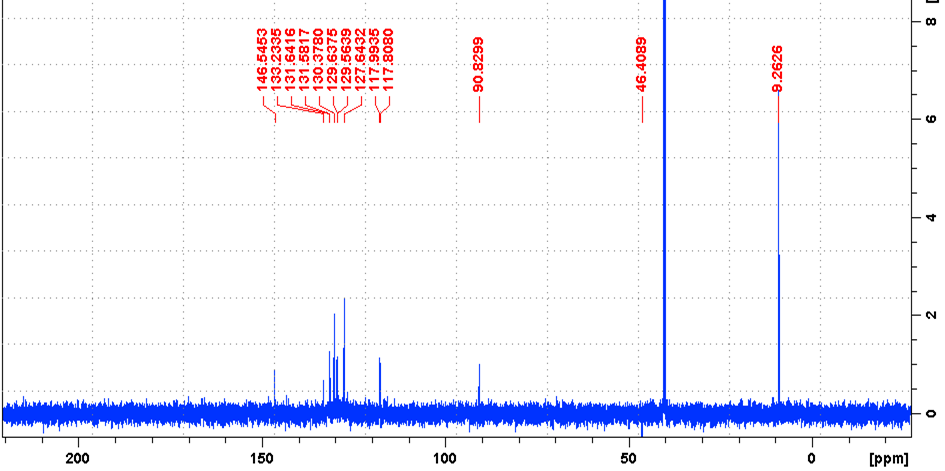


## Figure 1.39: The DEPT (135) spectrum of compound 14b (DMSO-d6).


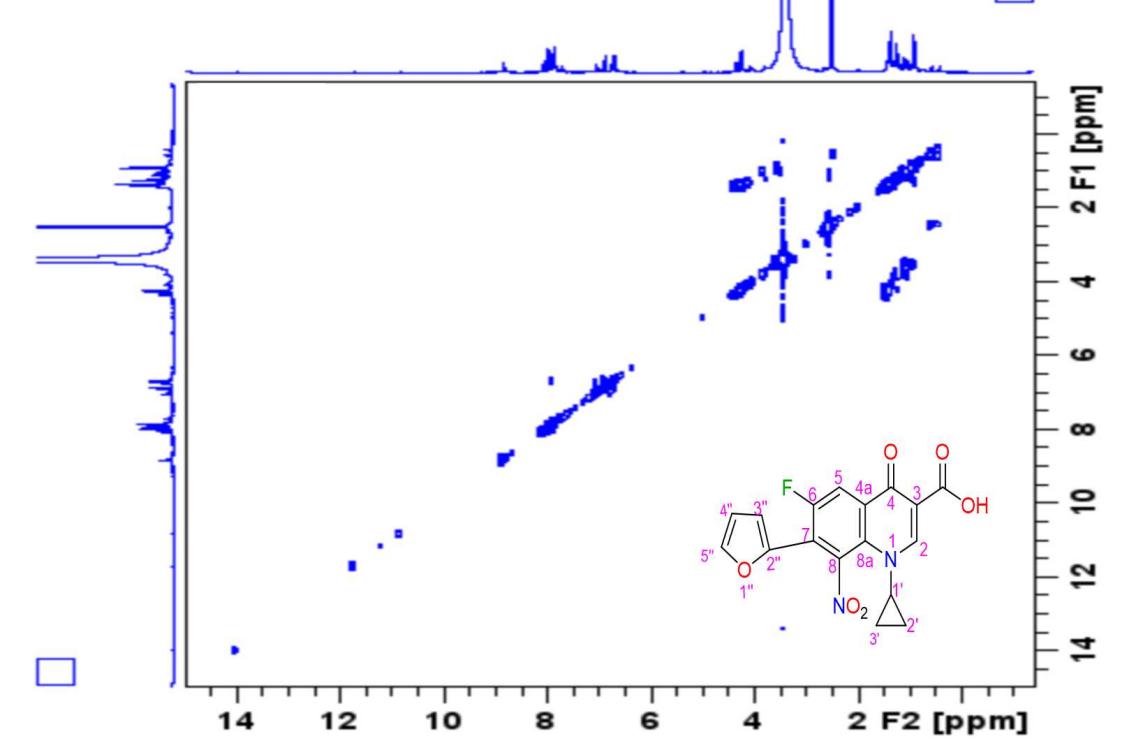


## Figure 1.40: The COSY spectrum of compound 14b (DMSO-d6).


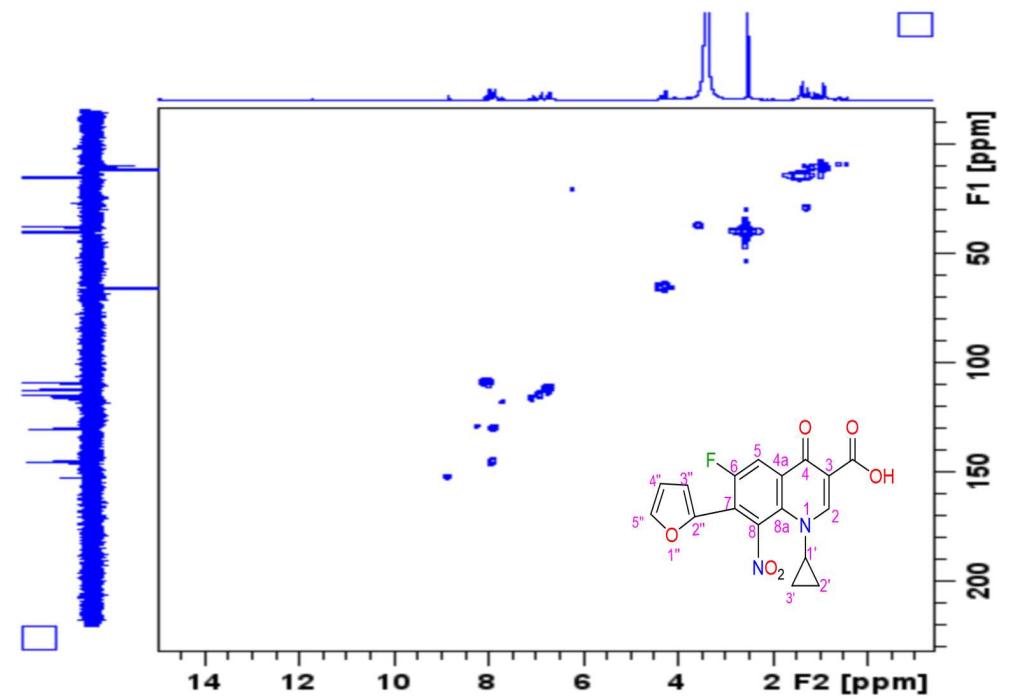


## Figure 1.41: The HMQC spectrum of compound 14b (DMSO-d6).


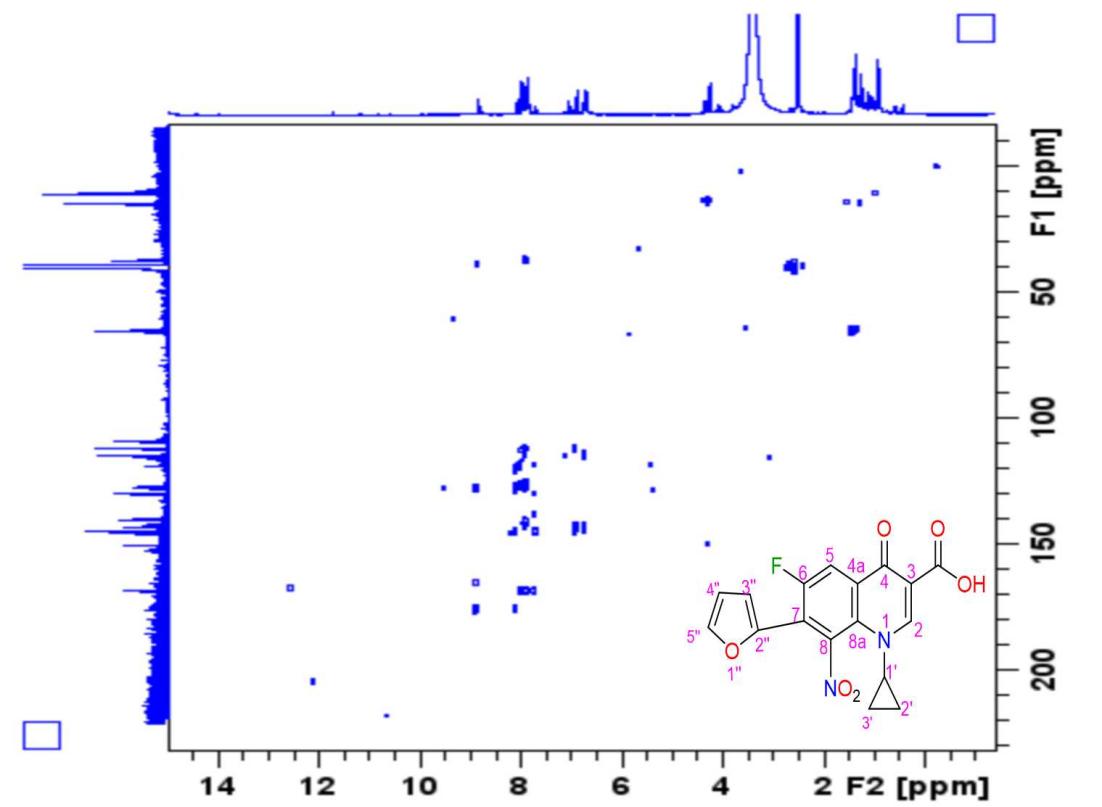


## Figure 1.42: The HMBC spectrum of compound 14b (DMSO-d6).


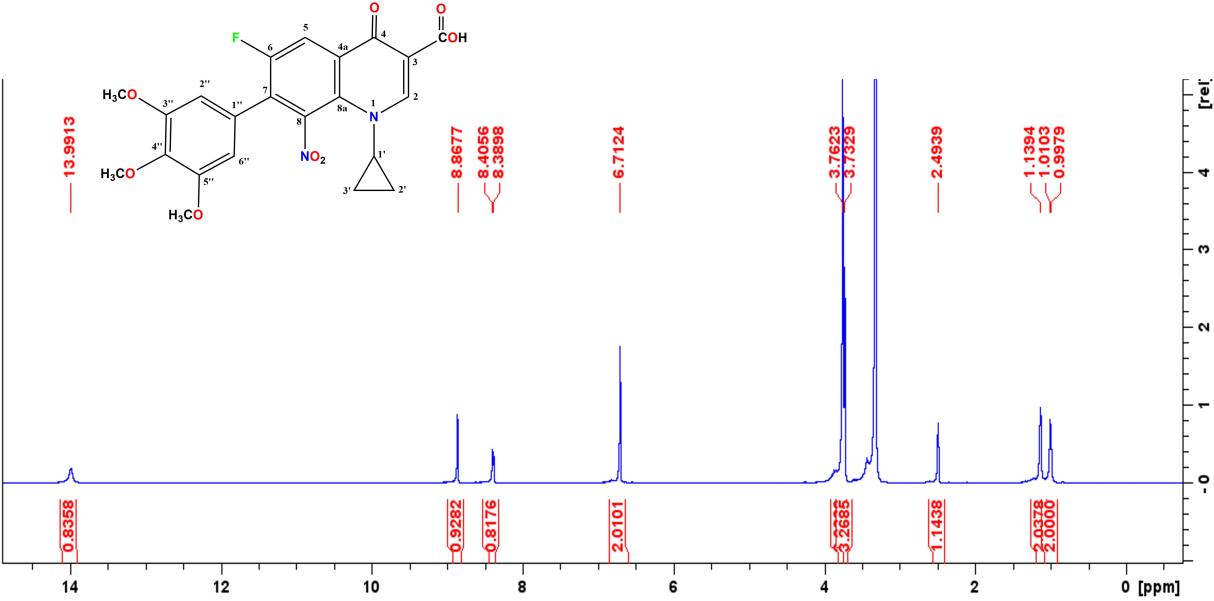
 Figure 1.43: The 1H-NMR spectrum of compound 16b (DMSO-d6).


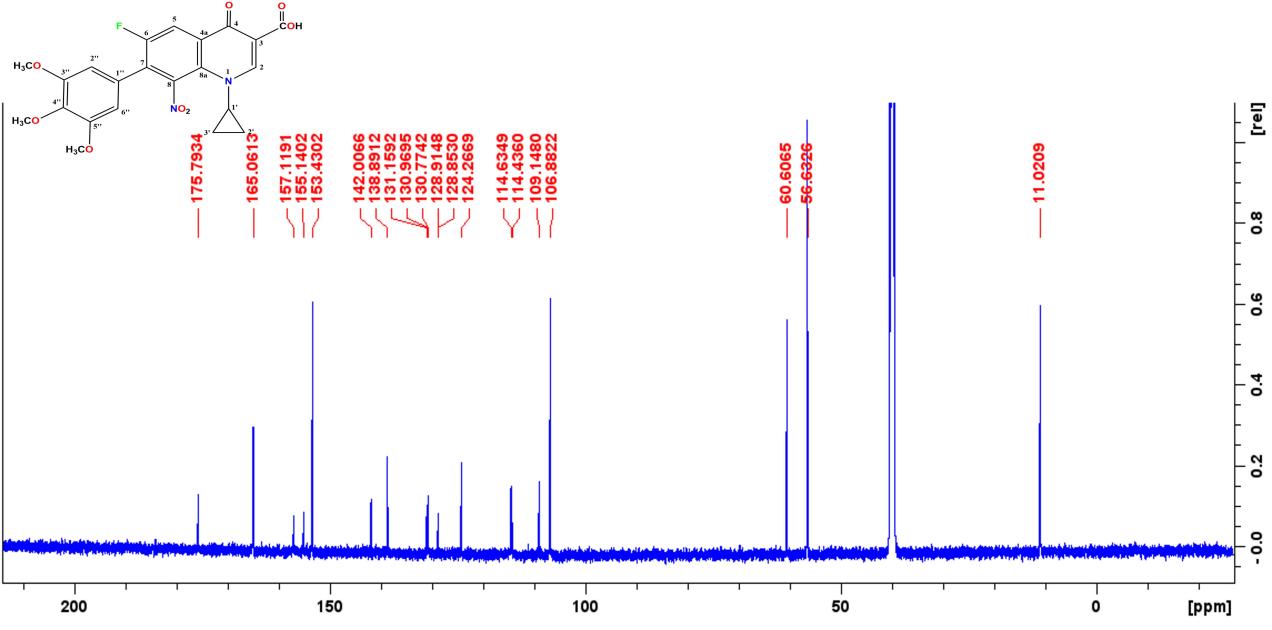
 Figure 1.44: The 13C-NMR spectrum of compound 16b (DMSO-d6).


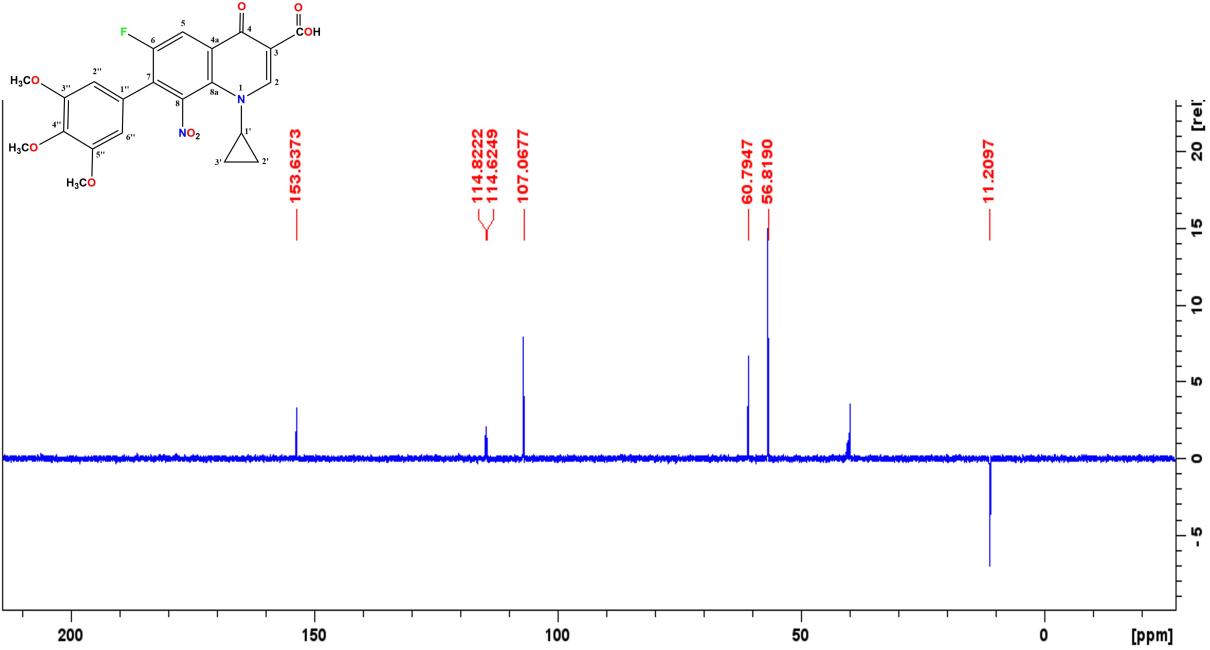


## Figure 1.45: The DEPT (135) spectrum of compound 16b (DMSO-d6).


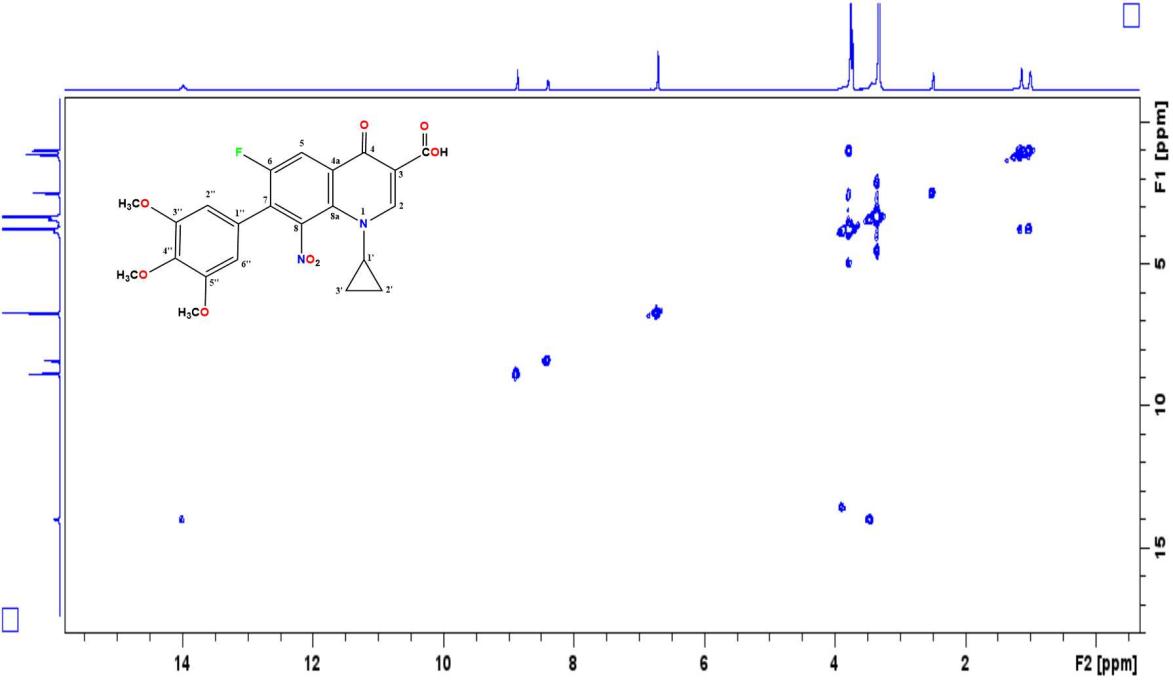


## Figure 1.46 The COSY spectrum of compound 16b (DMSO-d6).


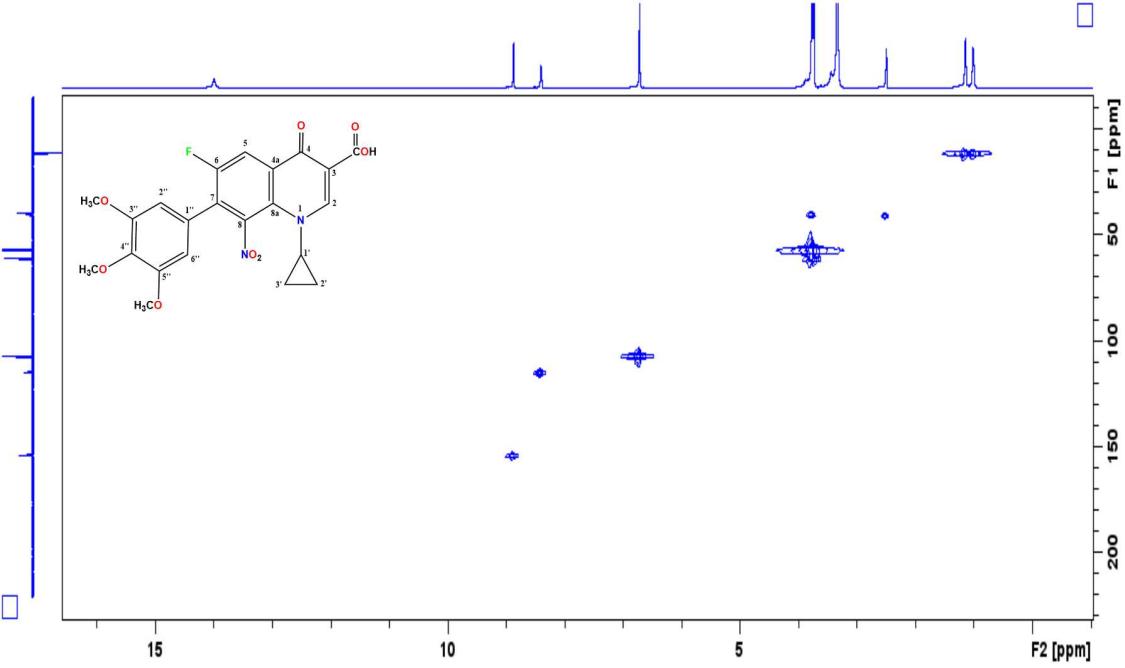


## Figure 1.47: The HMQC spectrum of compound 16b (DMSO-d6).


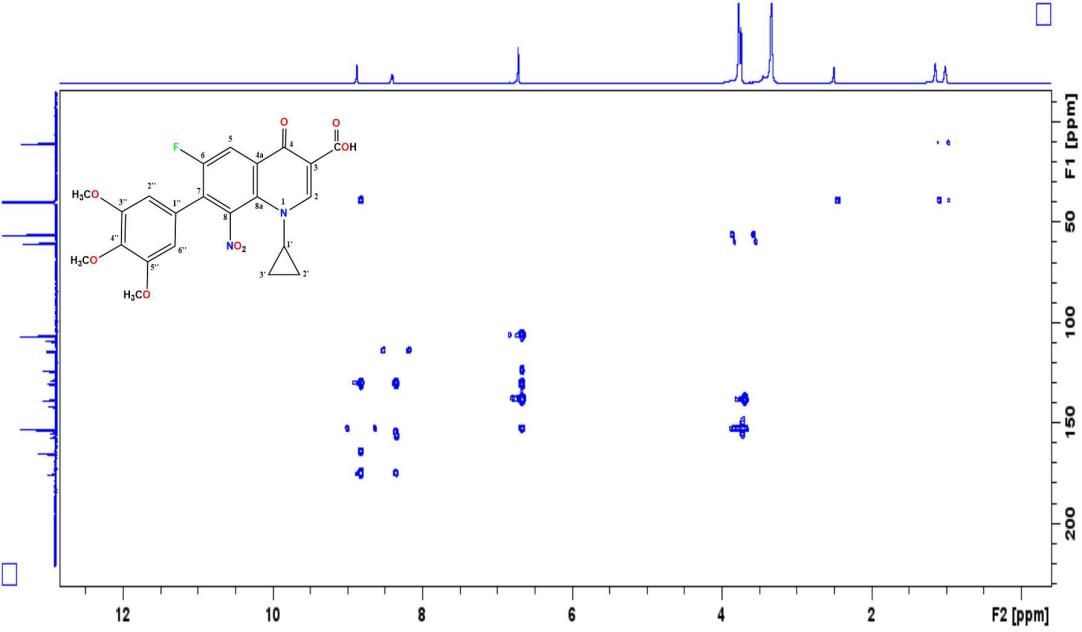


## Figure 1.48: The HMBC spectrum of compound 16b (DMSO-d6).


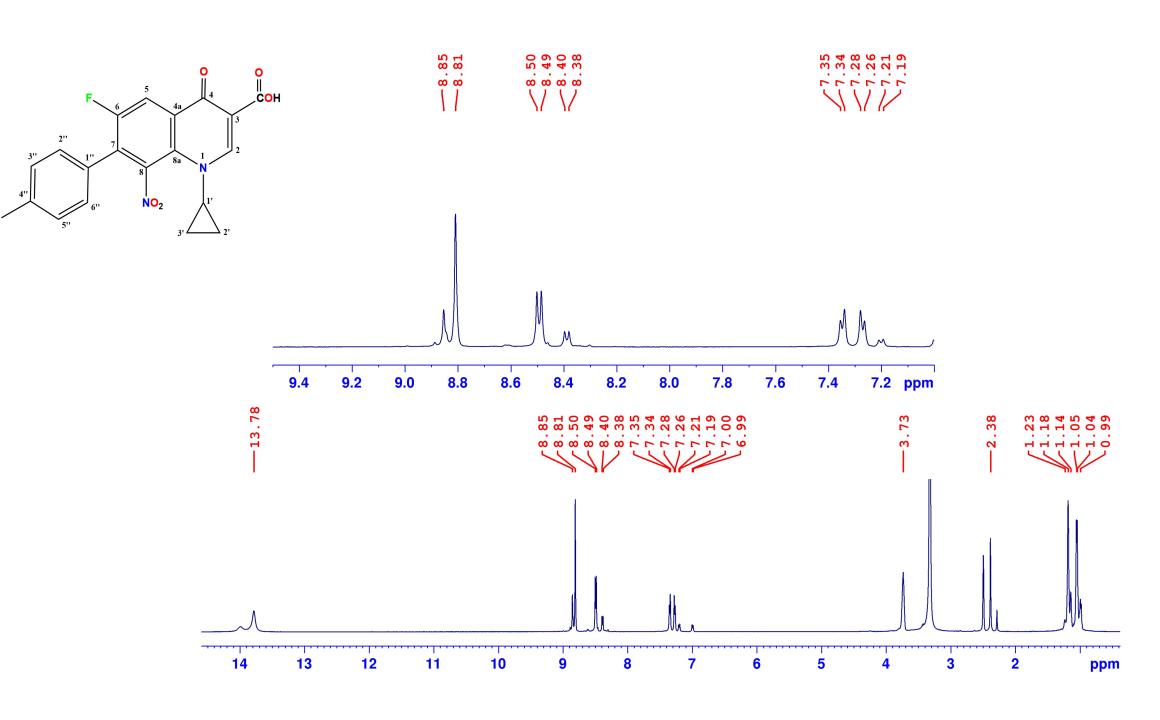
 Figure 1.49: The 1H-NMR spectrum of compound 18b (DMSO-d6).


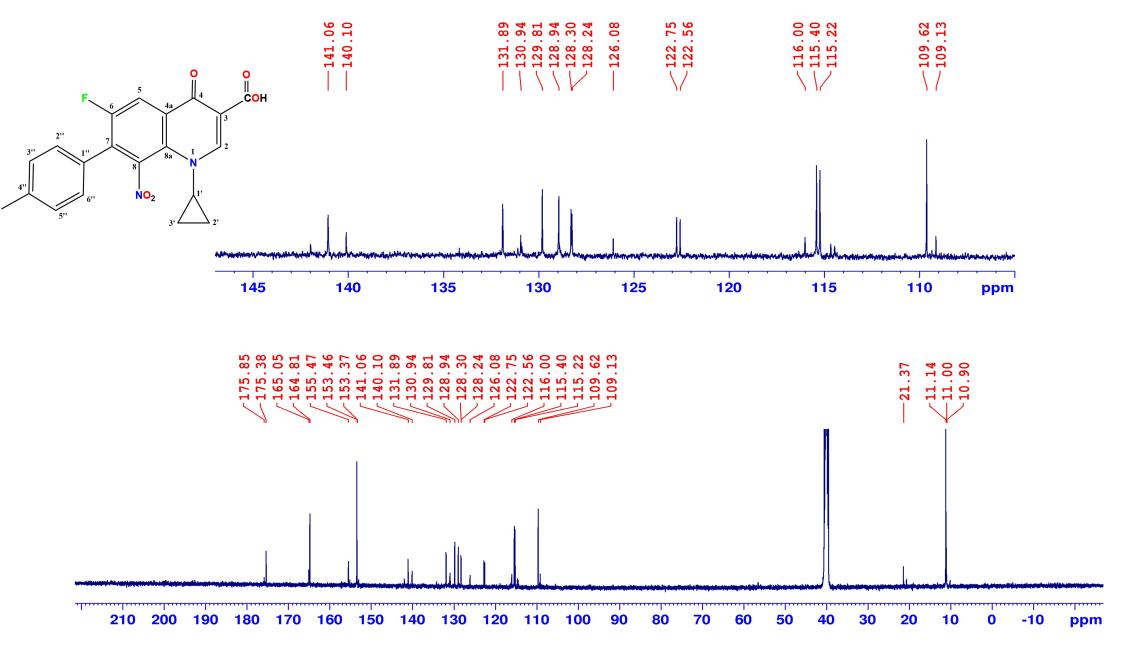
 Figure 1.50: The 13C-NMR spectrum of compound 18b (DMSO-d6).


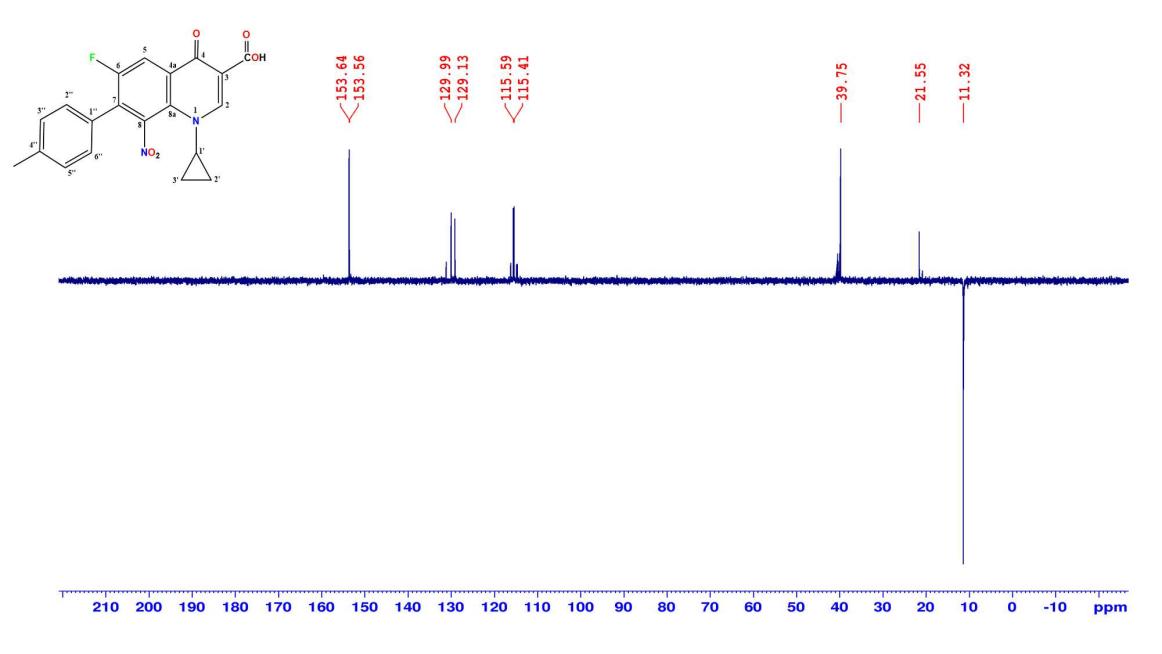


## Figure 1.51: The DEPT (135) spectrum of compound 18b (DMSO-d6).


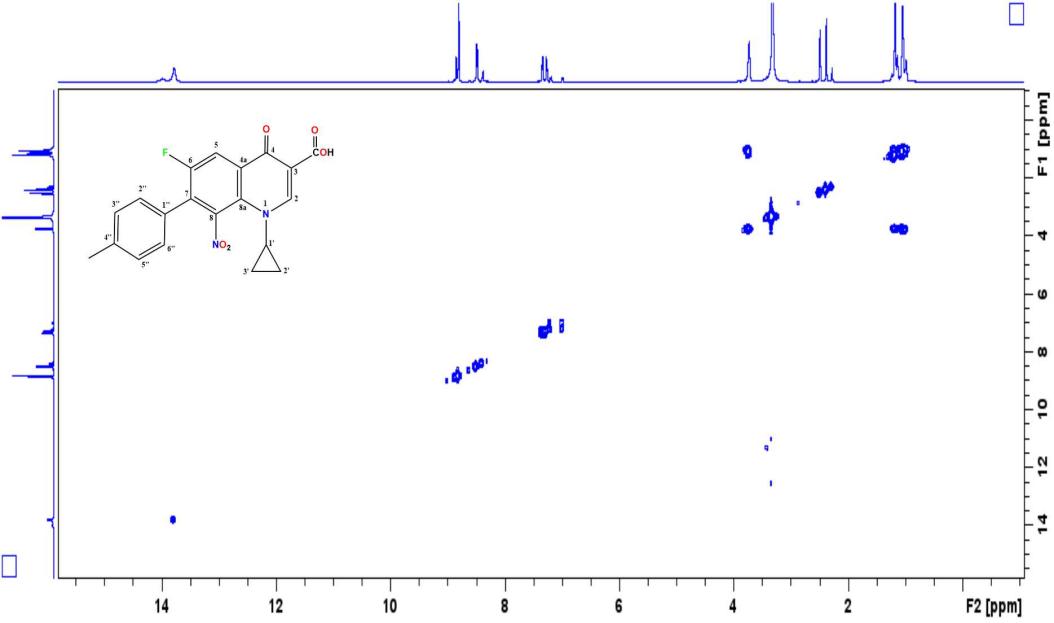


## Figure 1.52: The COSY spectrum of compound 18b (DMSO-d6).


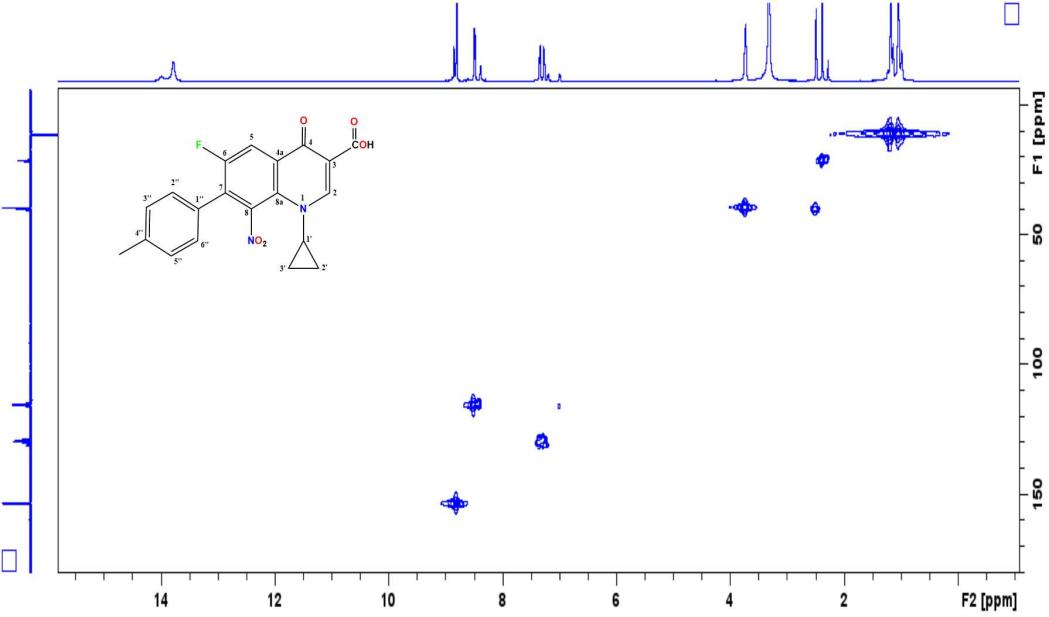


## Figure 1.53: The HMQC spectrum of compound 18b (DMSO-d6).


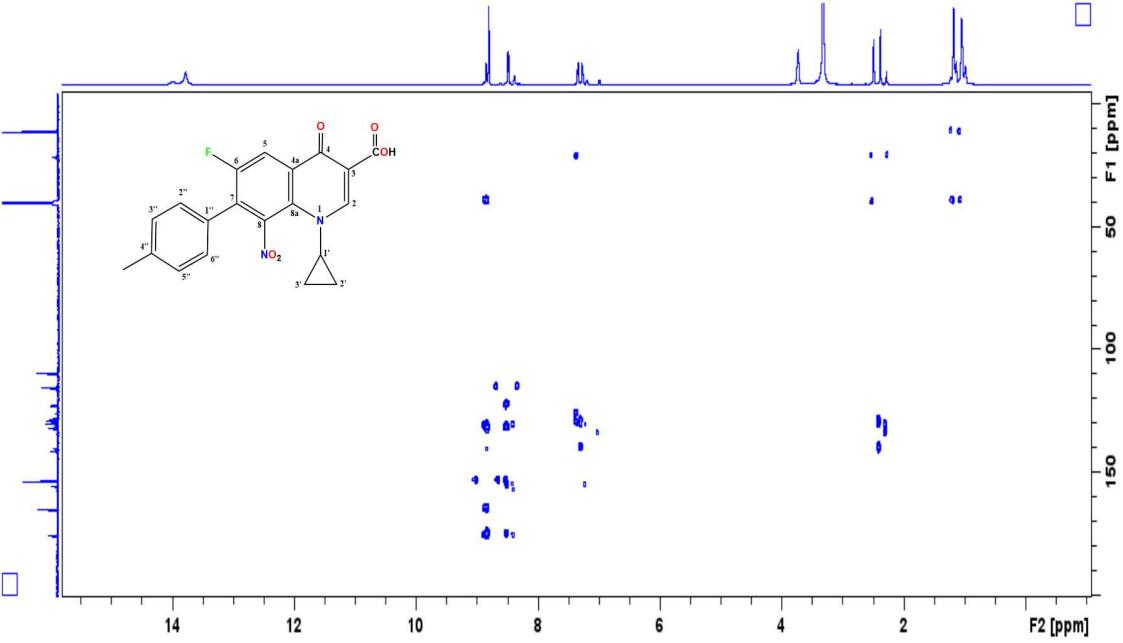


## Figure 1.54: The HMBC spectrum of compound 18b (DMSO-d6).


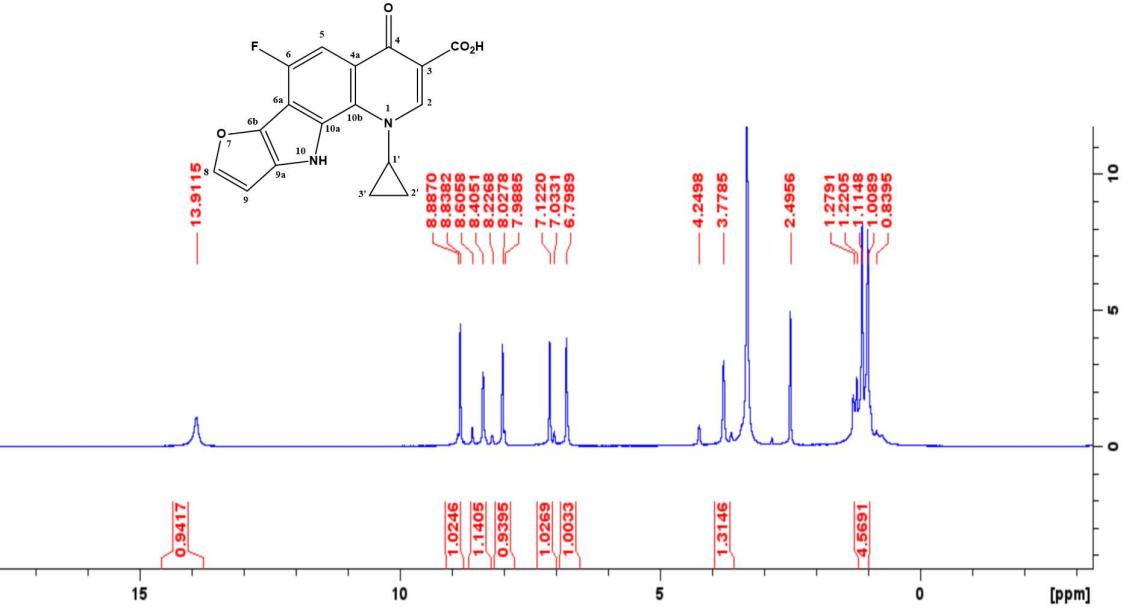
 Figure 1.55: The 1H-NMR spectrum of compound15b (DMSO-d6).


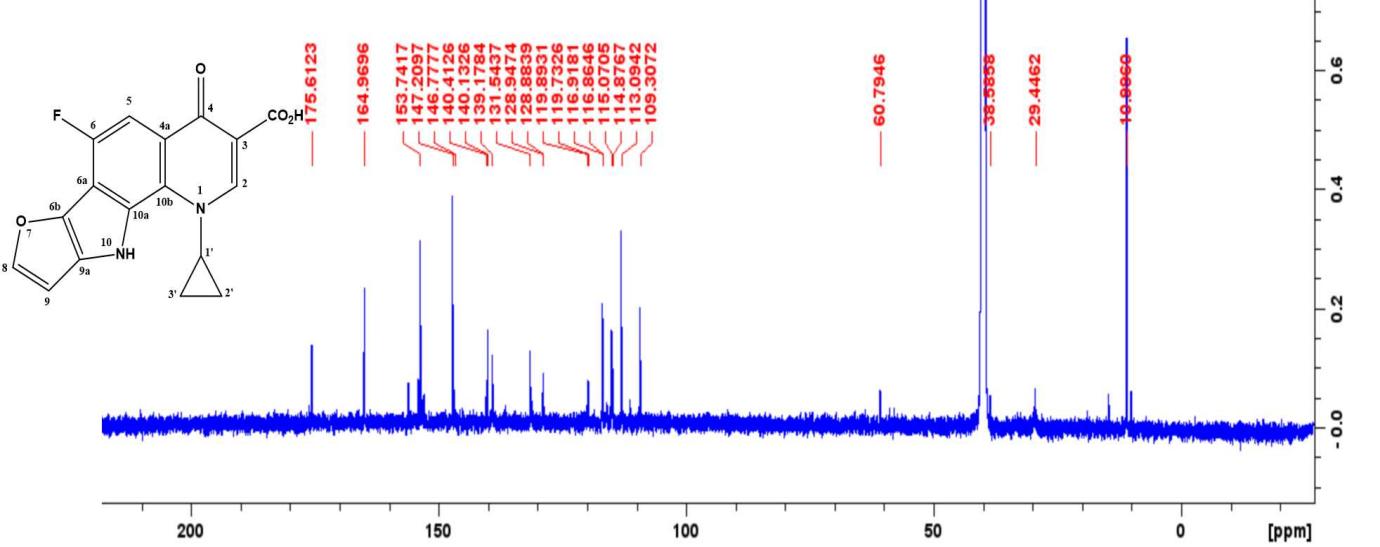
 Figure 1.56: The 13C-NMR spectrum of compound 15b (DMSO-d6).


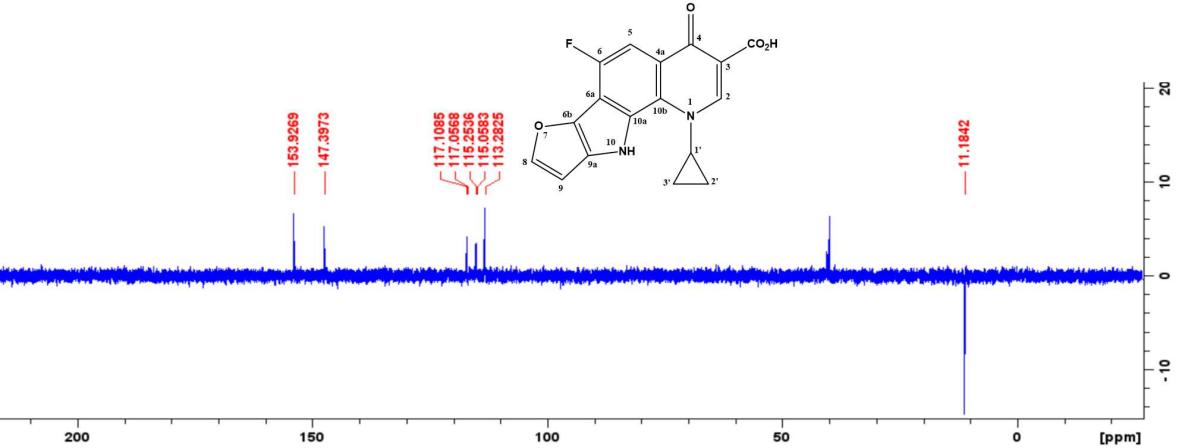


## Figure 1.57: The DEPT (135) spectrum of compound 15b (DMSO-d6).


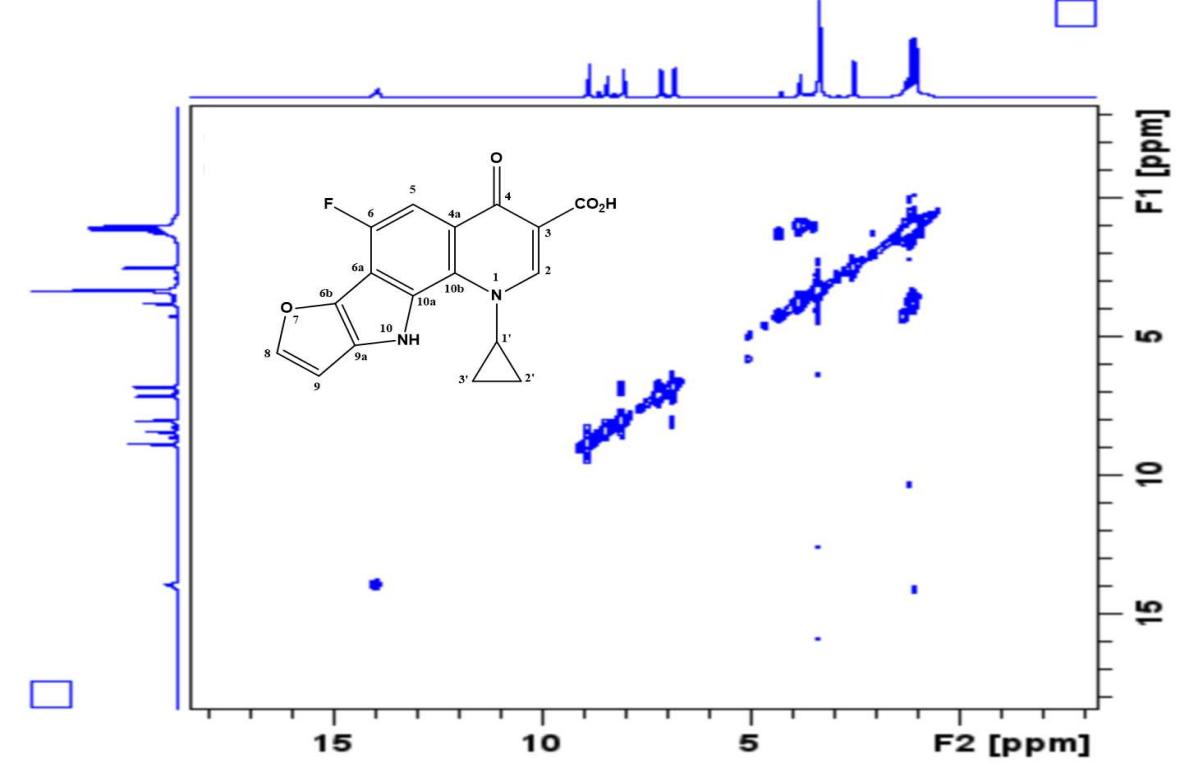


## Figure 1.58: The COSY spectrum of compound 15b (DMSO-d6).


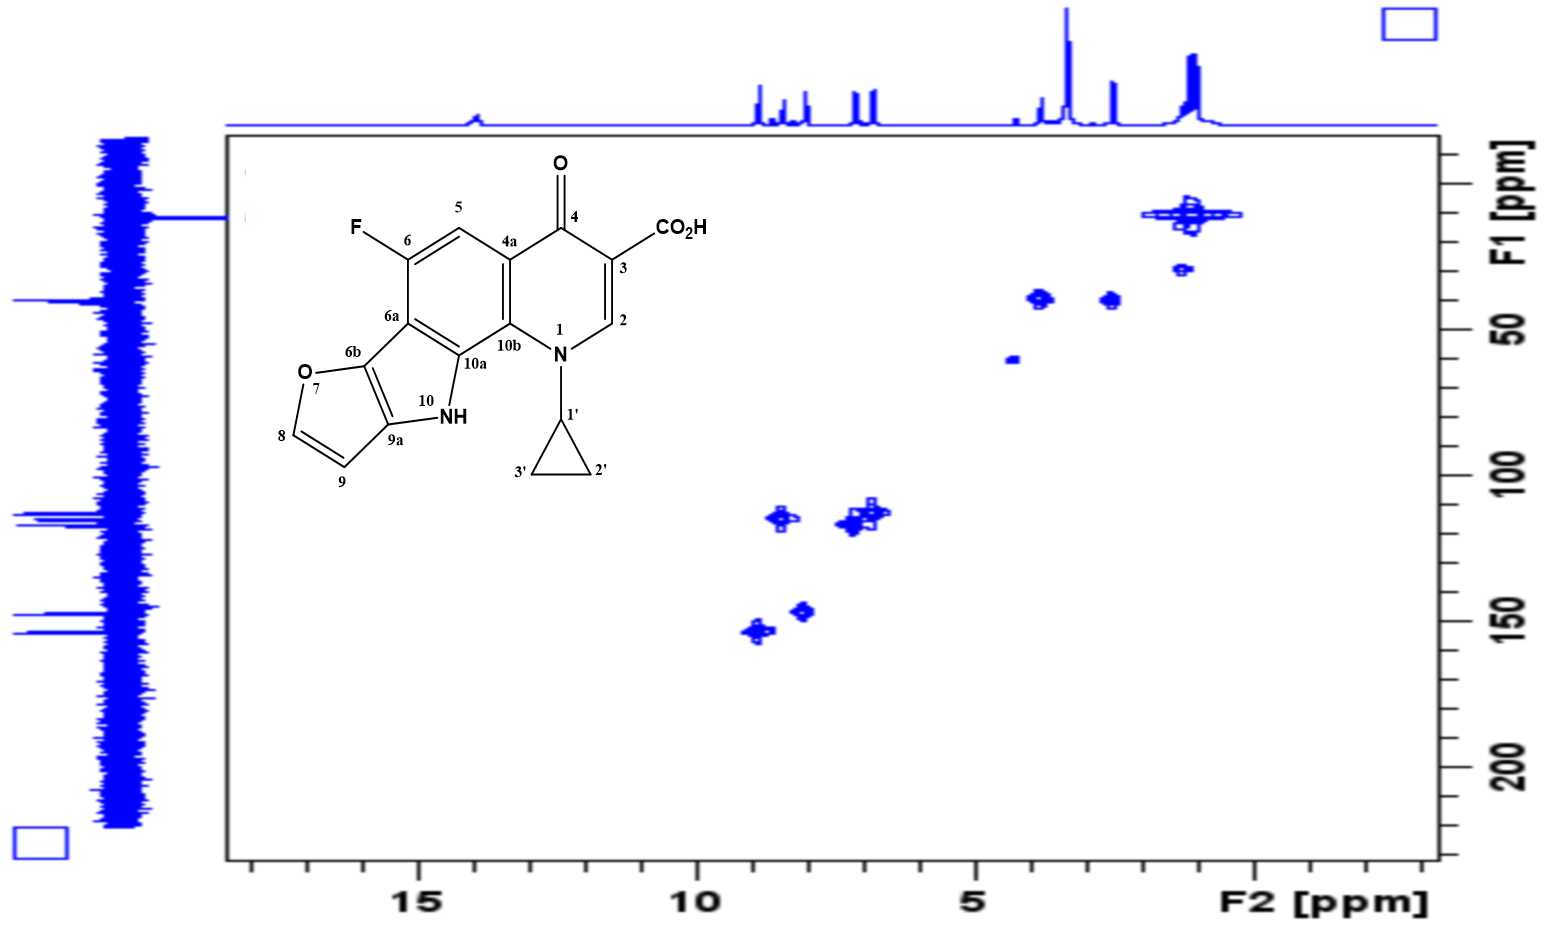


## Figure 1.59: The HMQC spectrum of compound 15b (DMSO-d6).


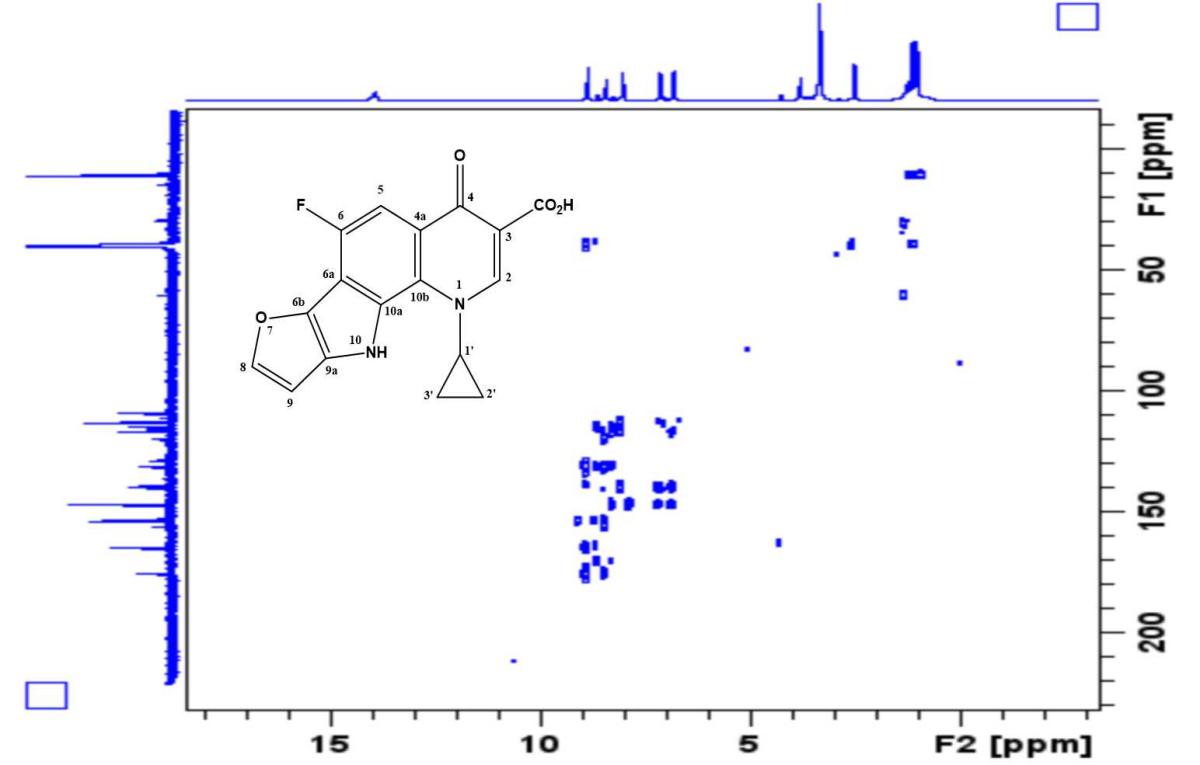


## Figure 1.60: The HMBC spectrum of compound 15b (DMSO-d6).


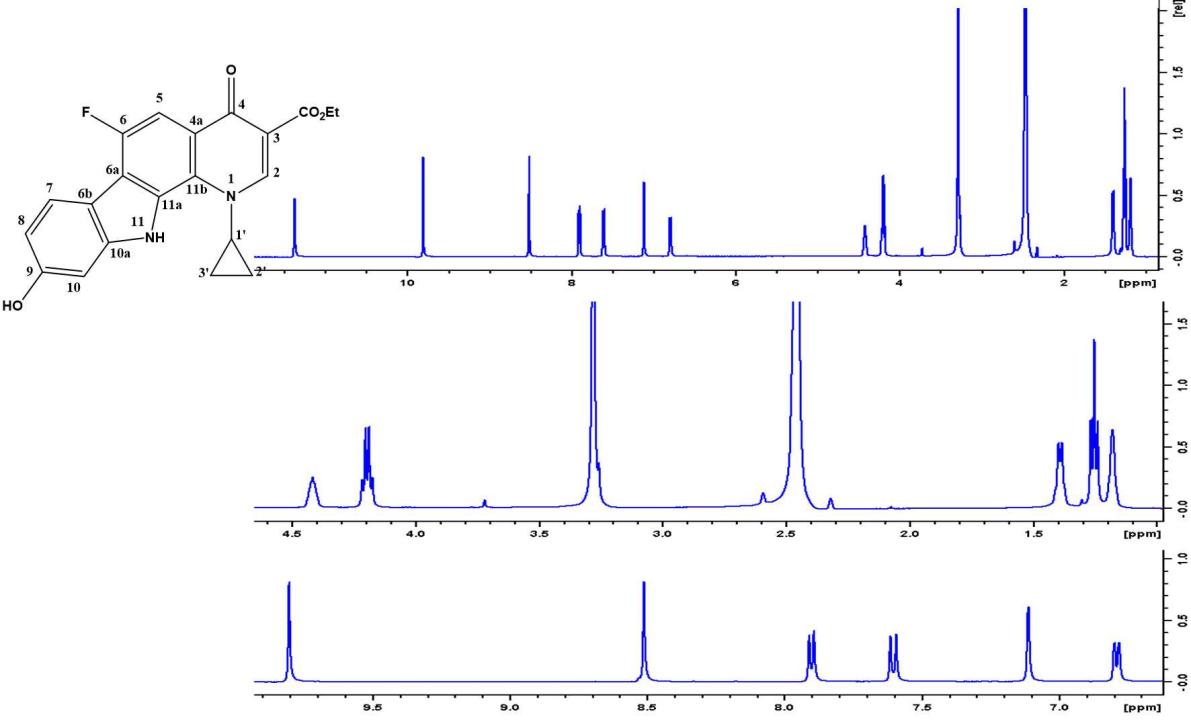
 Figure 1.61: The 1H-NMR spectrum of compound 20a (DMSO-d6


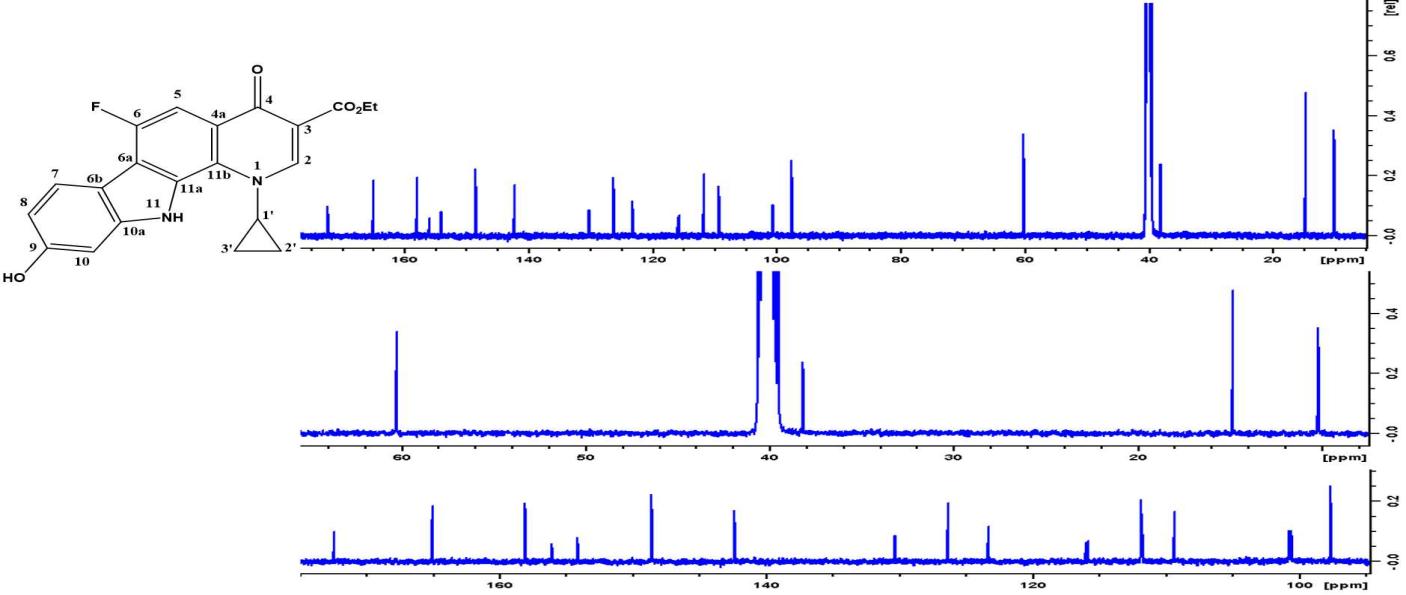
 Figure 1.62: The 13C-NMR spectrum of compound 20a (DMSO-d6).


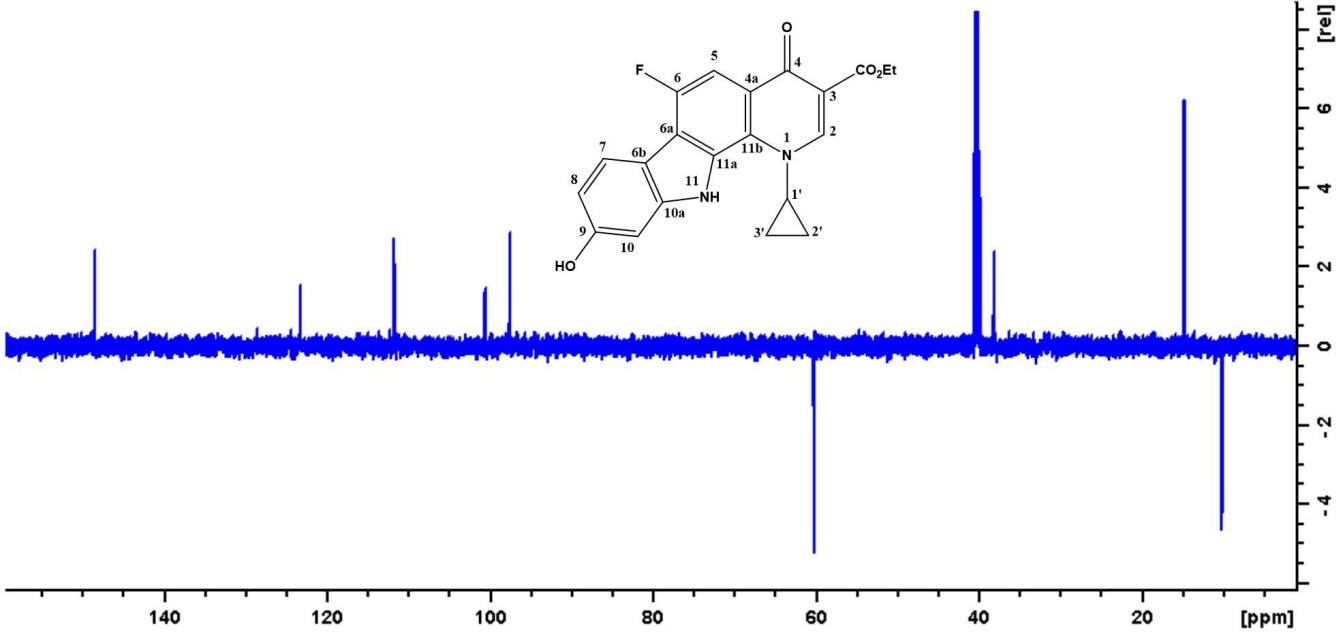


## Figure 1.63: The DEPT (135) spectrum of compound 20a (DMSO-d6).


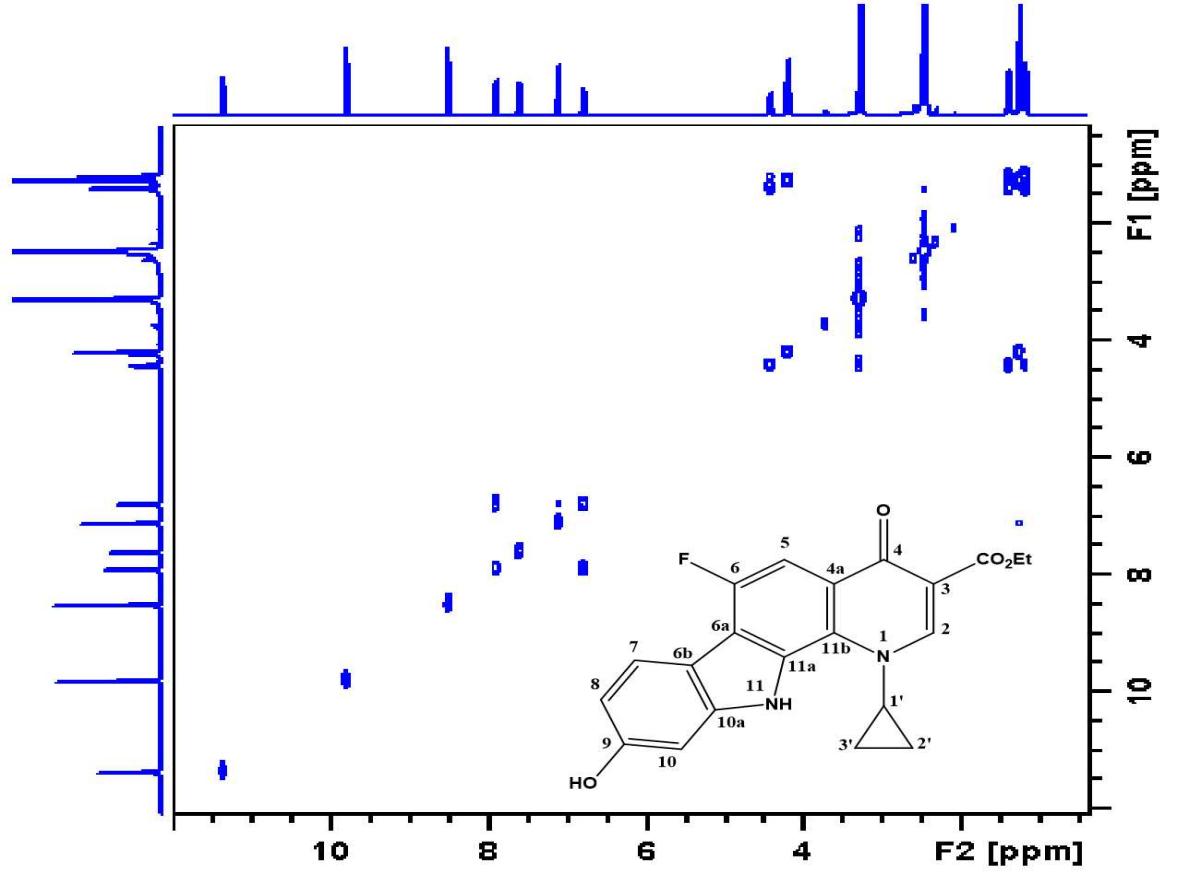


## Figure 1.64: The COSY spectrum of compound 20a (DMSO-d6).


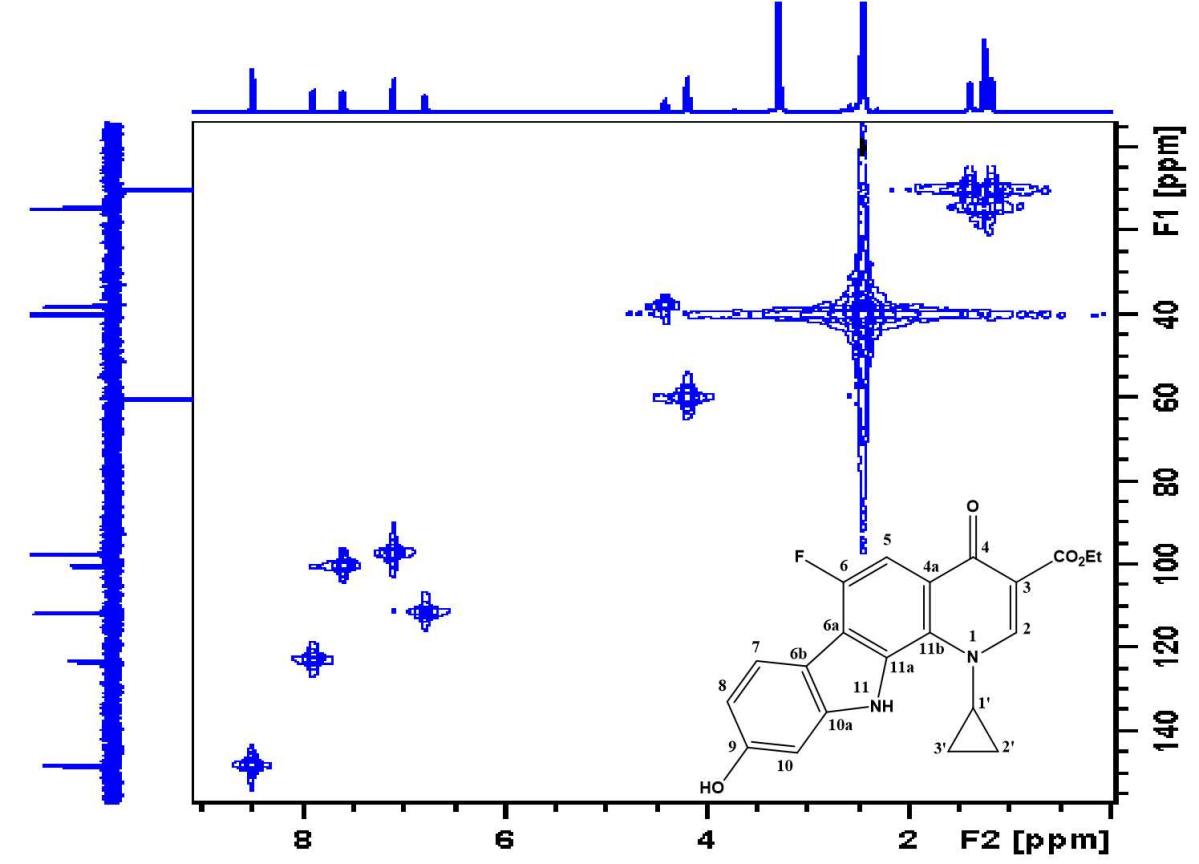


## Figure 1.65: The HMQC spectrum of compound 20a (DMSO-d6).


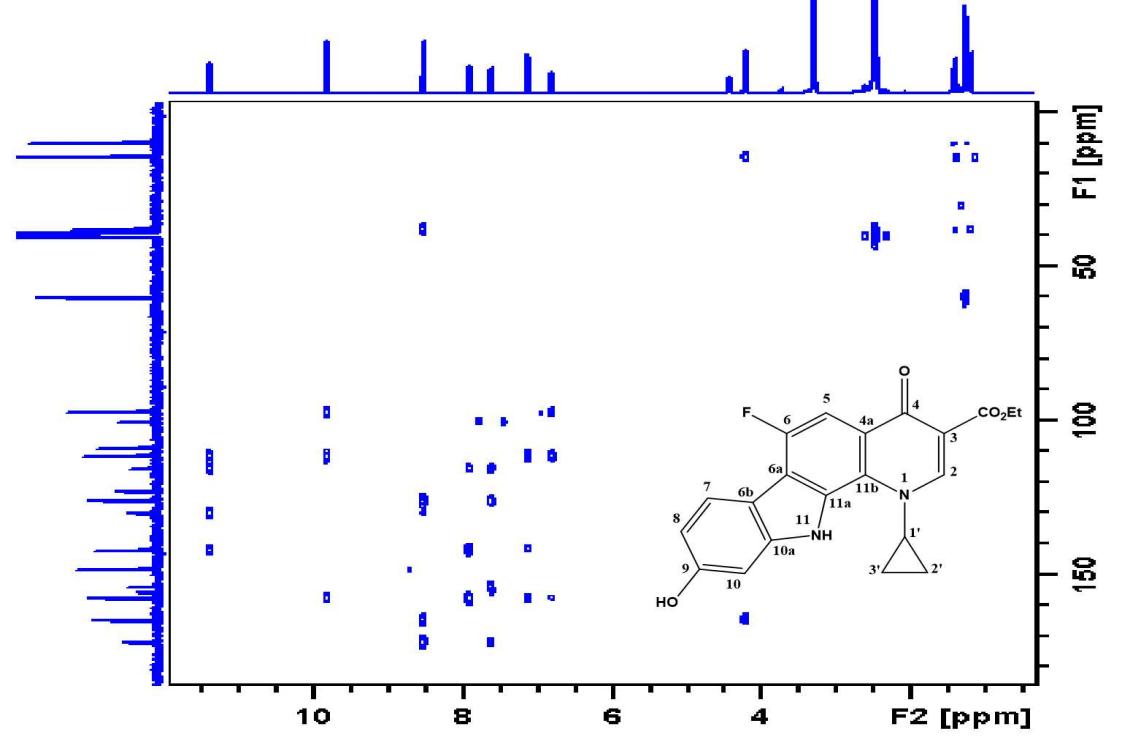


## Figure 1.66: The HMBC spectrum of compound 20a (DMSO-d6).


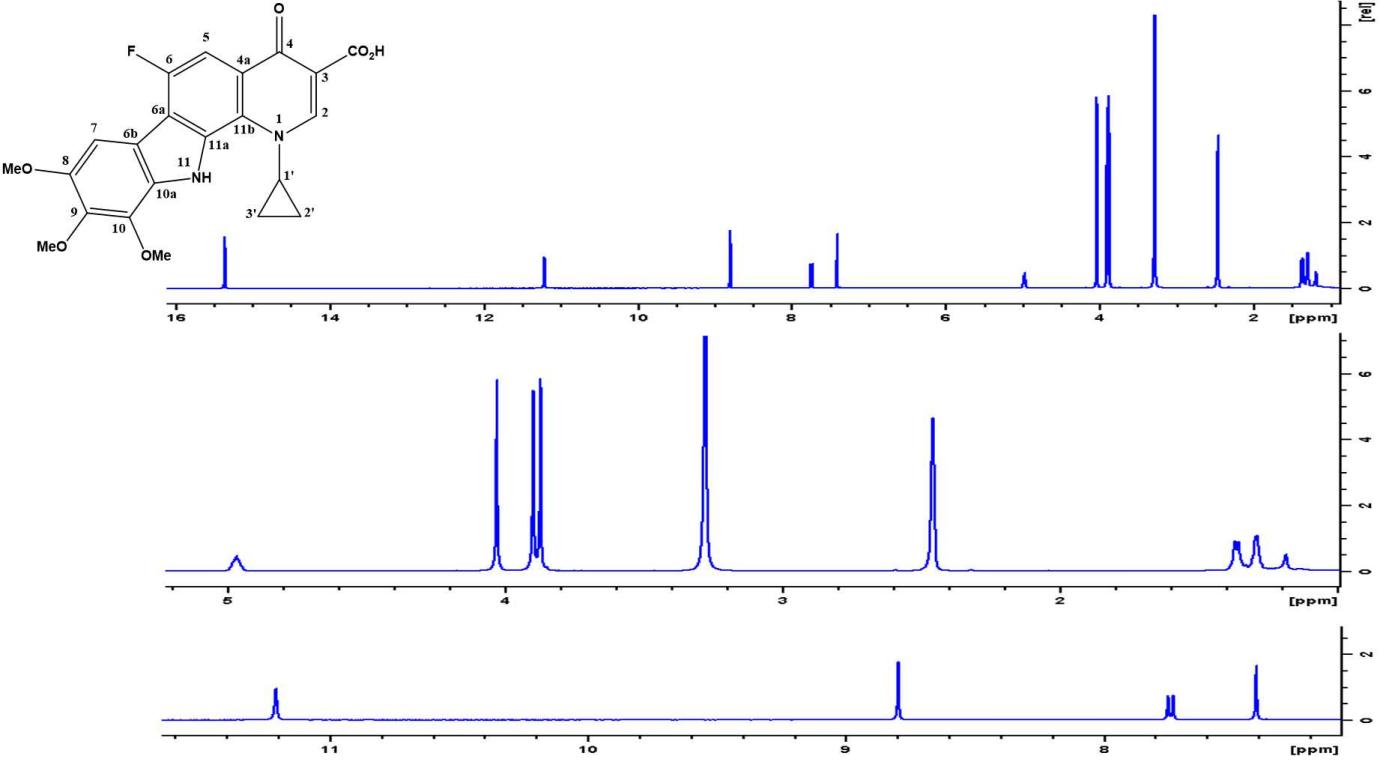
 Figure 1.67: The 1H-NMR spectrum of compound 19b (DMSO-d6)


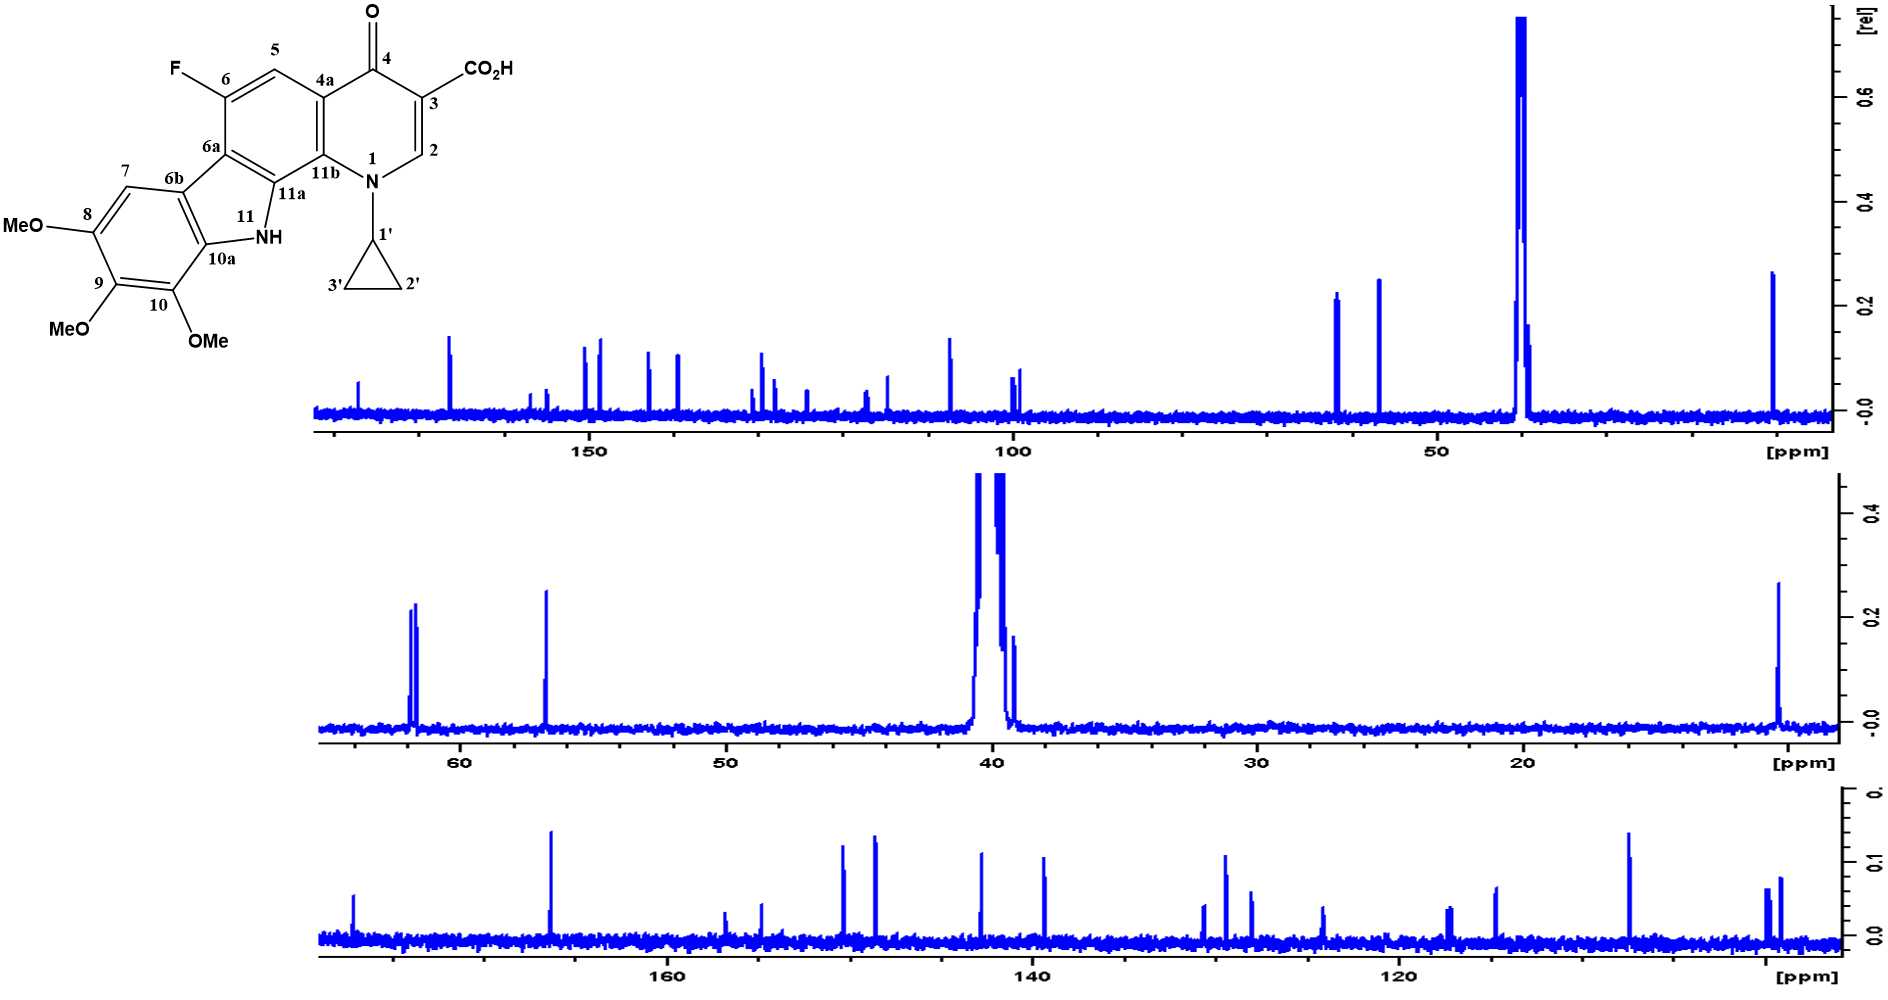
 Figure 1.68: The 13C-NMR spectrum of compound 19b (DMSO-d6).


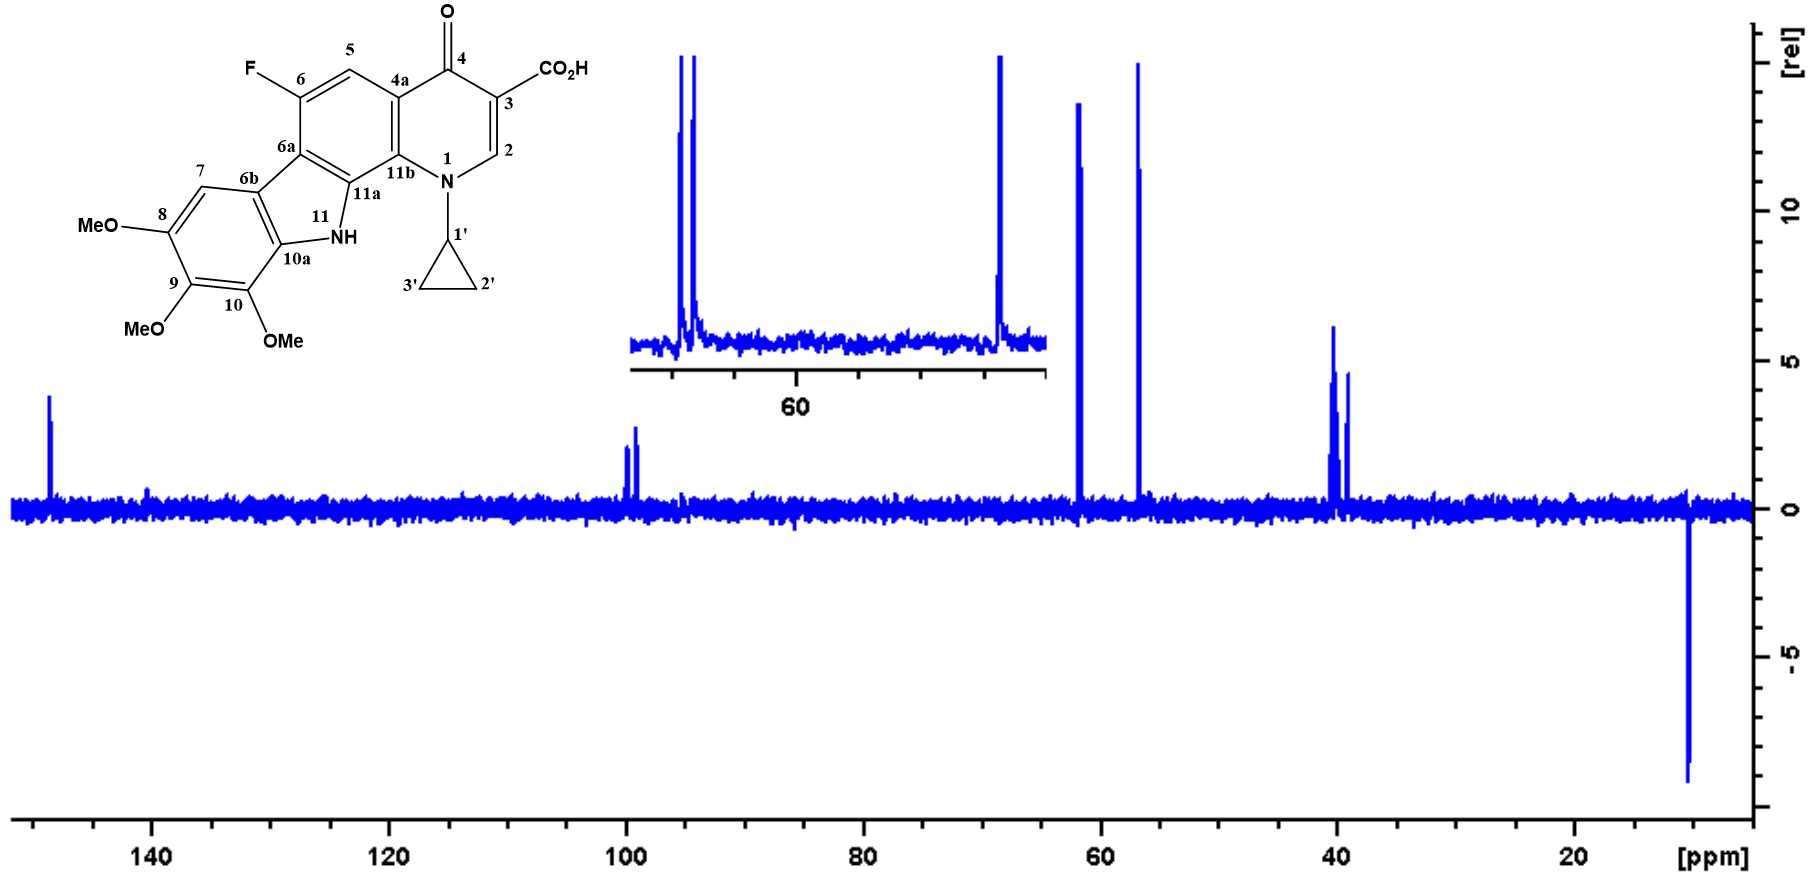


## Figure 1.69: The DEPT (135) spectrum of compound 19b (DMSO-d6)

##
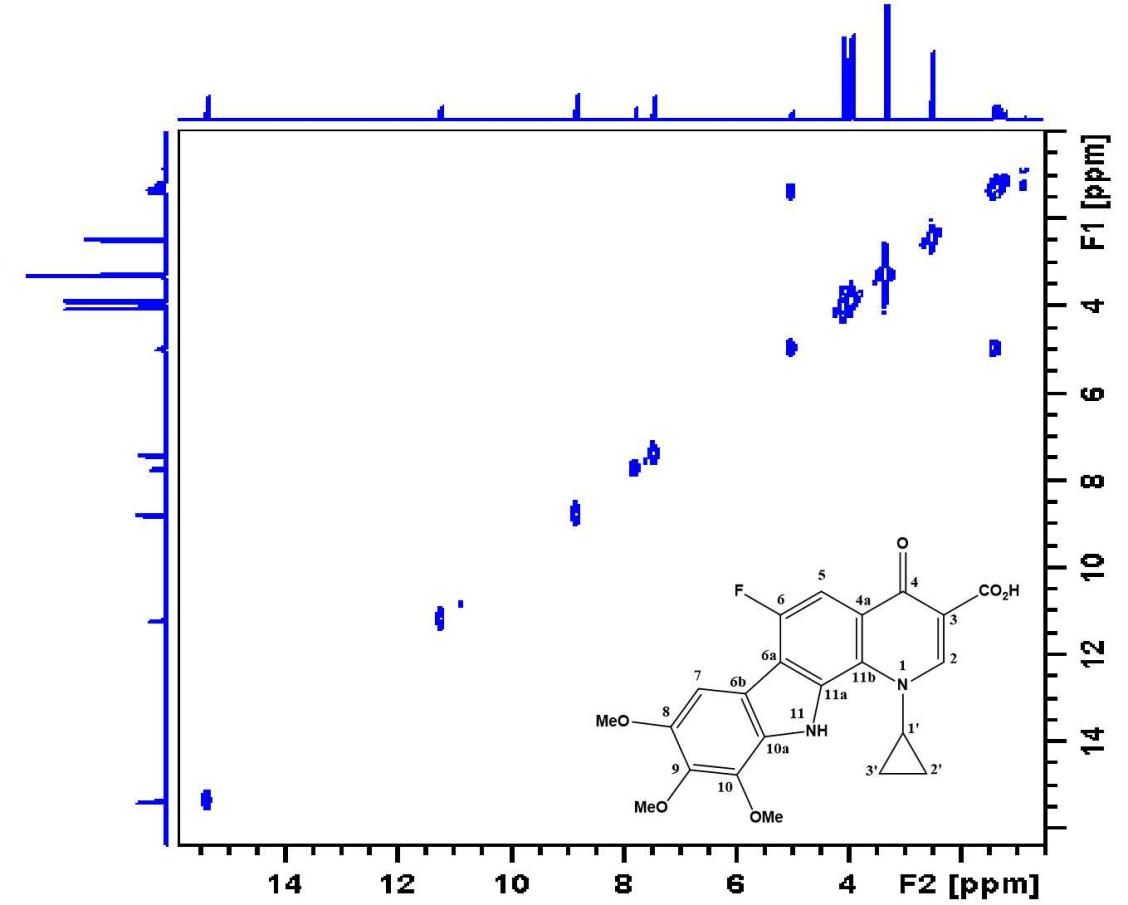


## Figure 1.70: The COSY spectrum of compound 19b (DMSO-d6).


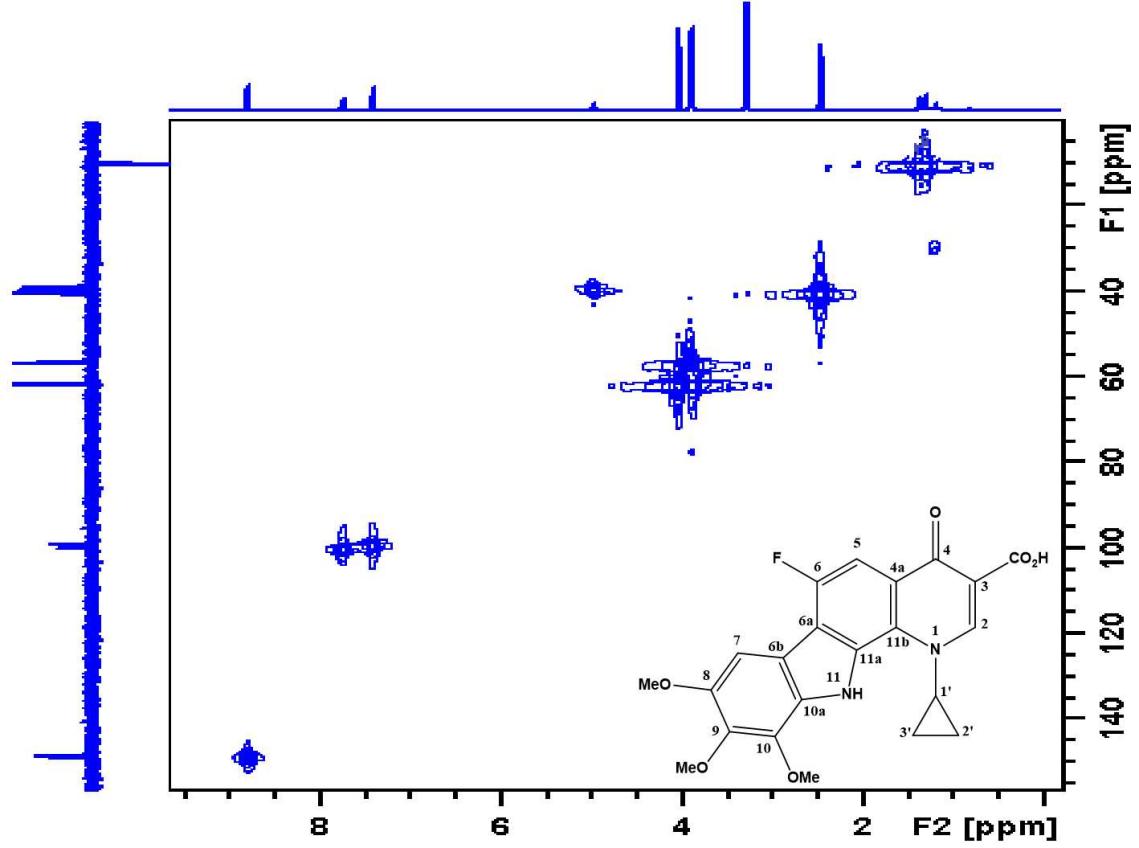


## Figure 1.71: The HMQC spectrum of compound 19b (DMSO-d6).


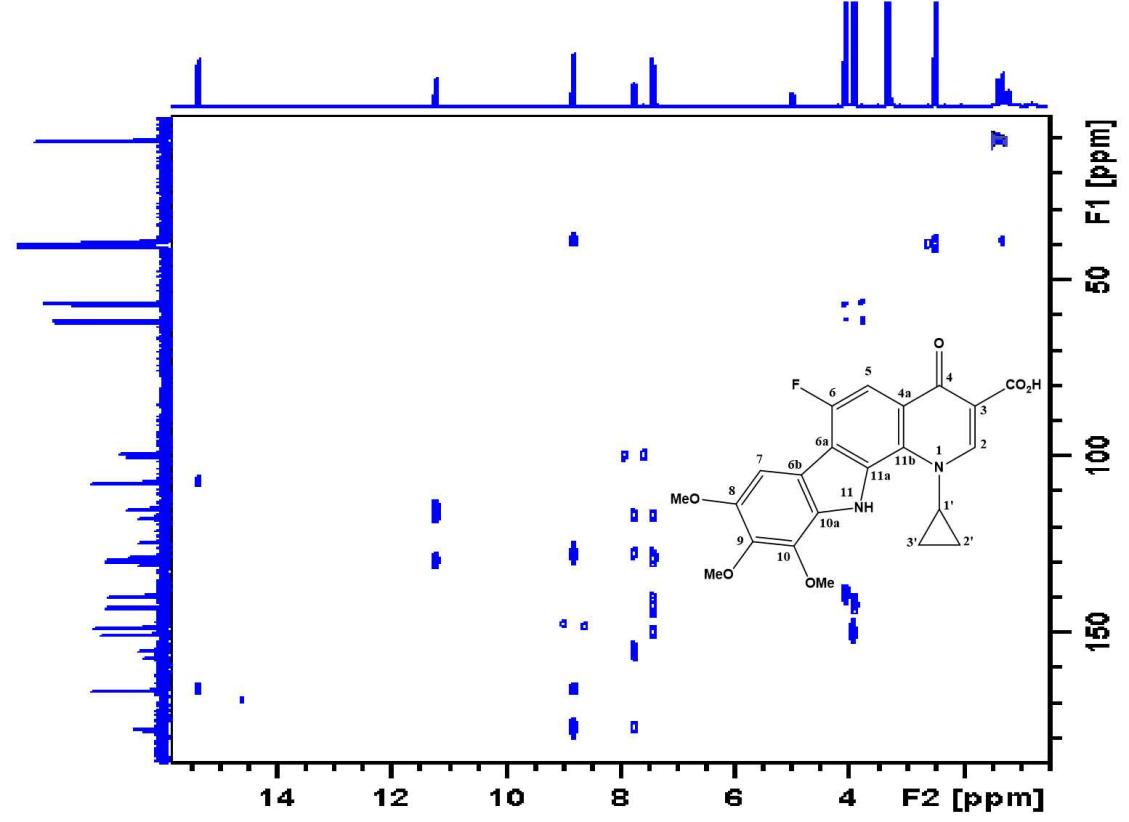


## Figure 1.72: The HMBC spectrum of compound 19b (DMSO-d6).

##
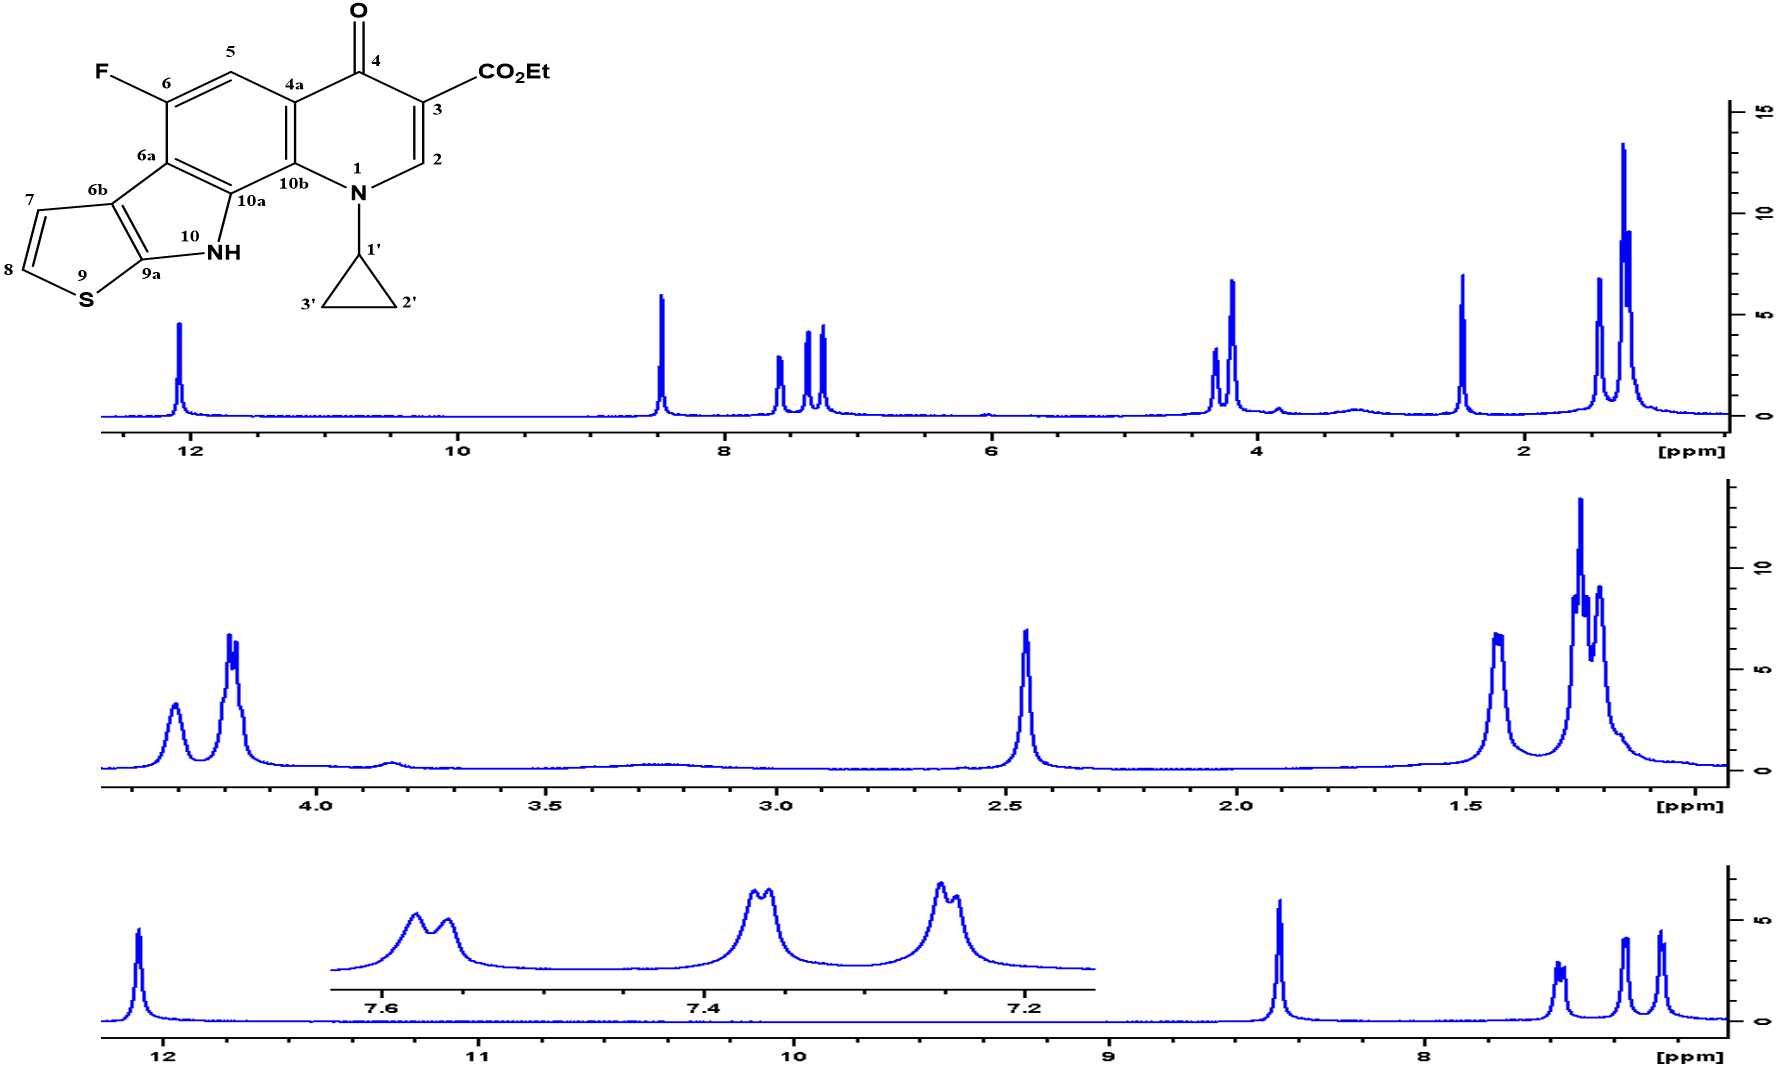
Figure 1.73: The 1H-NMR spectrum of compound 12a (DMSO-d6).

##
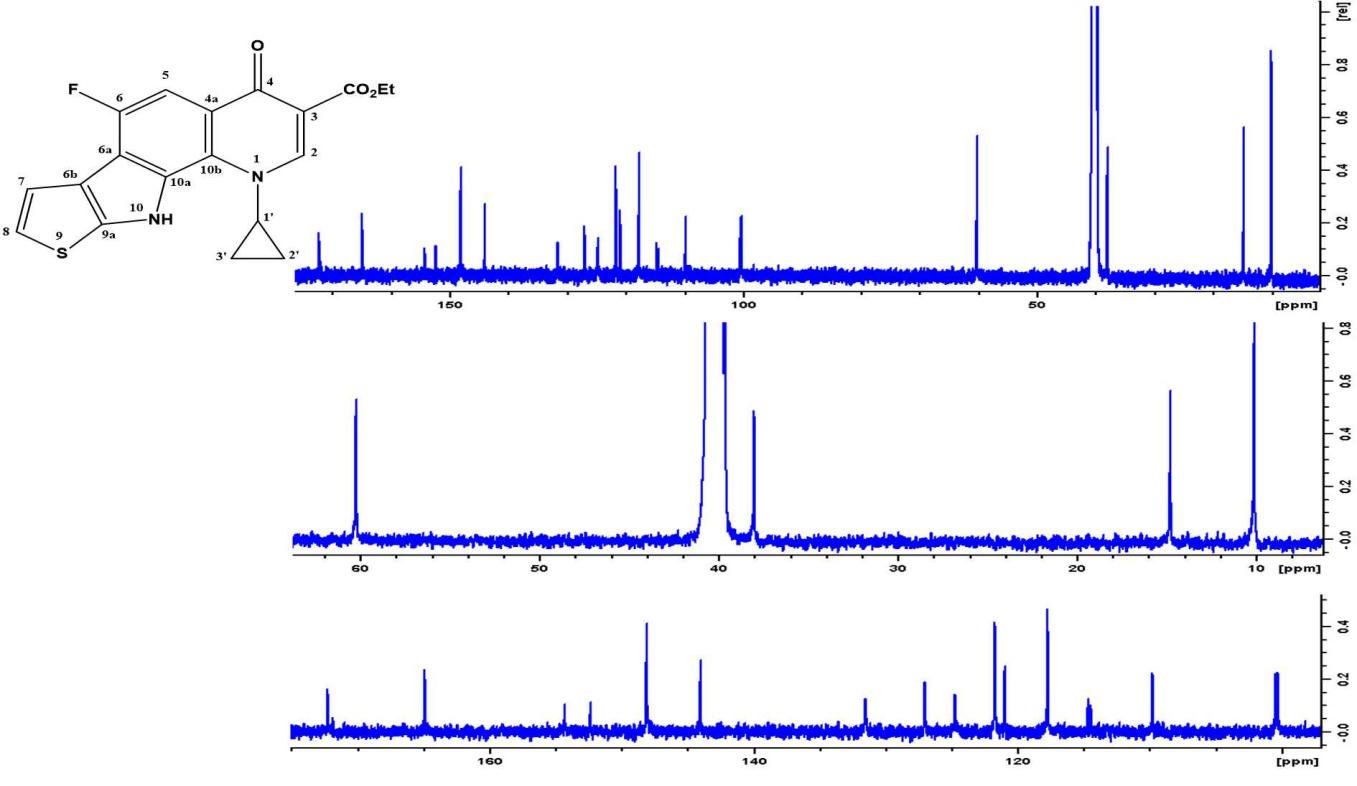


## Figure 1.74: The 13C-NMR spectrum of compound 12a (DMSO-d6).


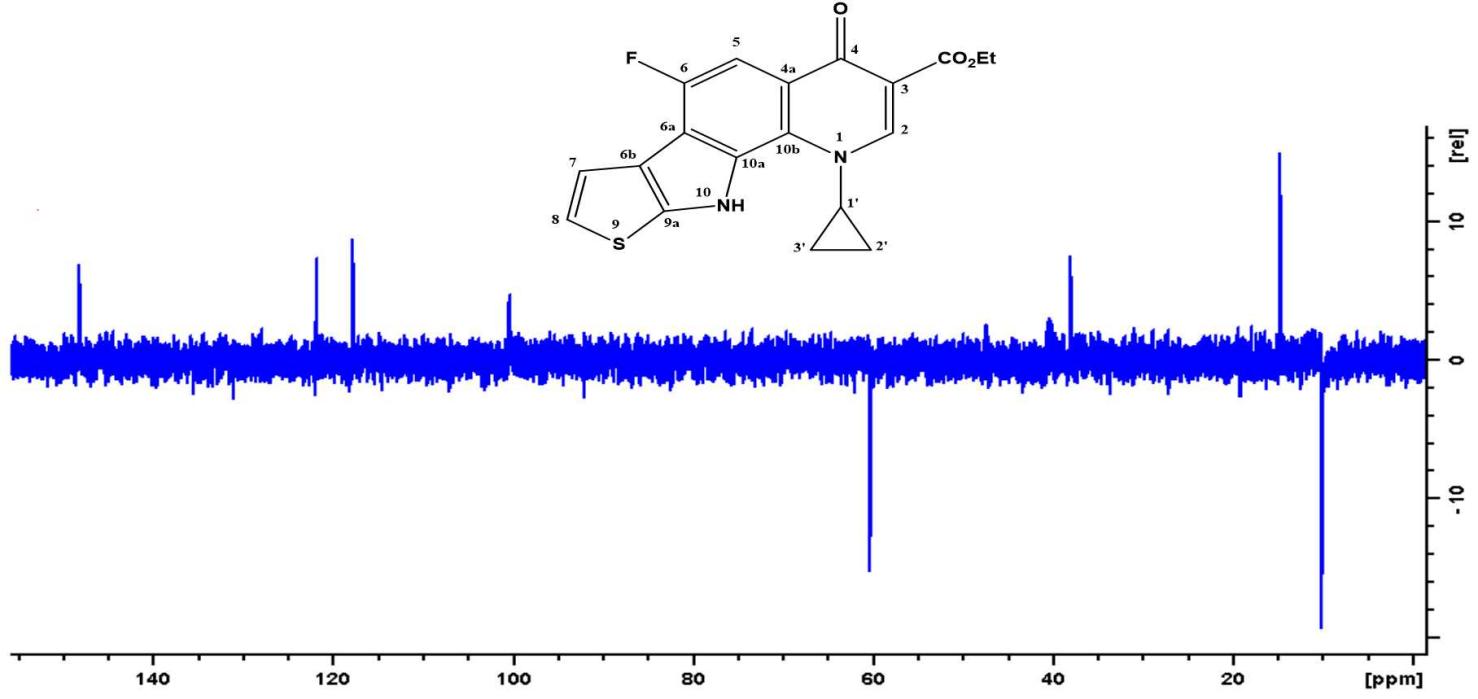


## Figure 1.75: The DEPT (135) spectrum of compound 12a (DMSO-d6)

##
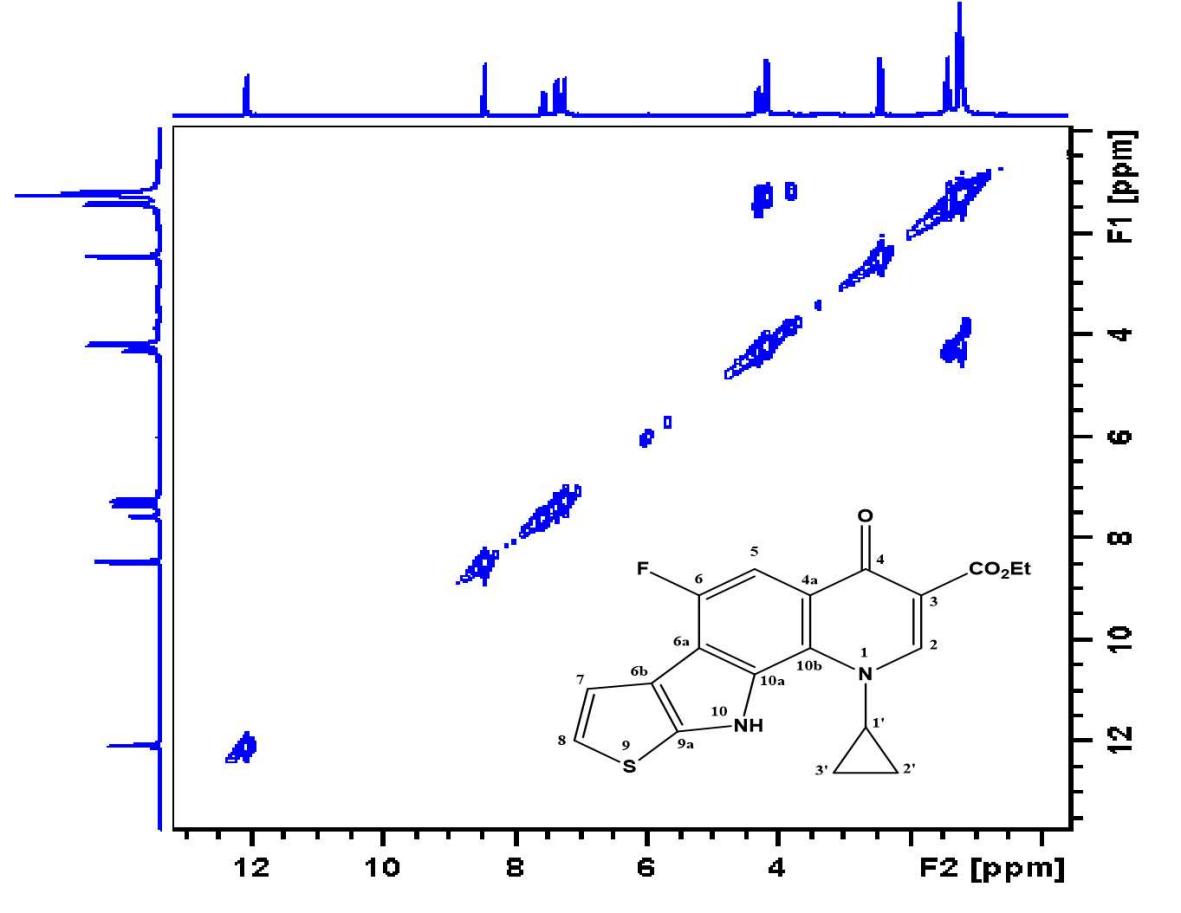


## Figure 1.76: The COSY spectrum of compound 12a (DMSO-d6).


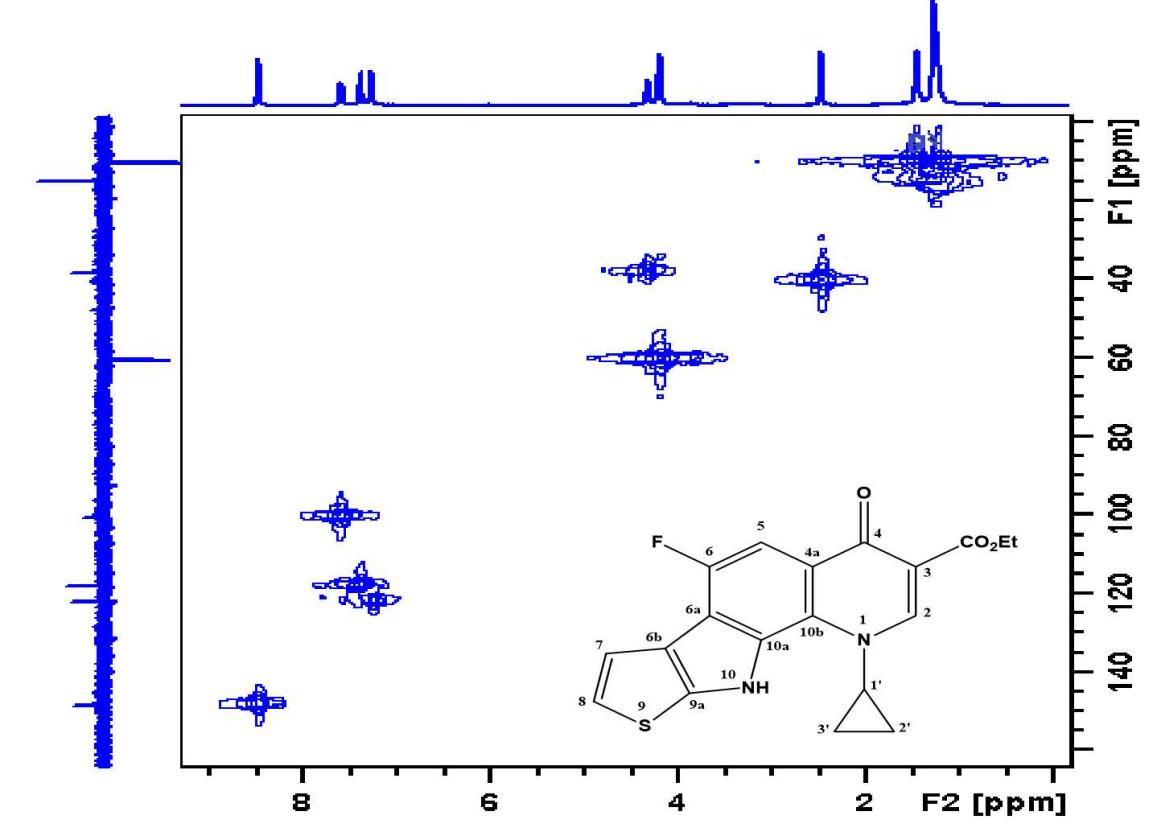


## Figure 1.77: The HMQC spectrum of compound 12a (DMSO-d6).


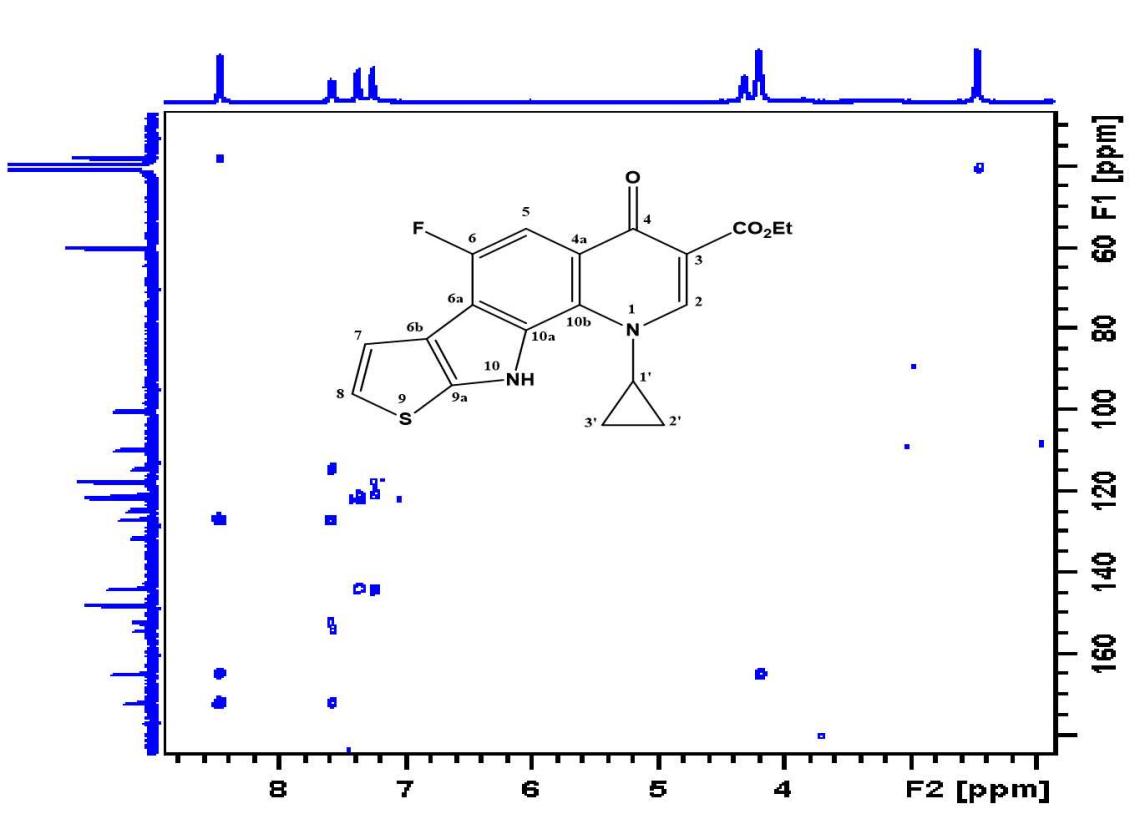


## Figure 1.78: The HMBC spectrum of compound 12a (DMSO-d6).

# Mass SPECTRUM


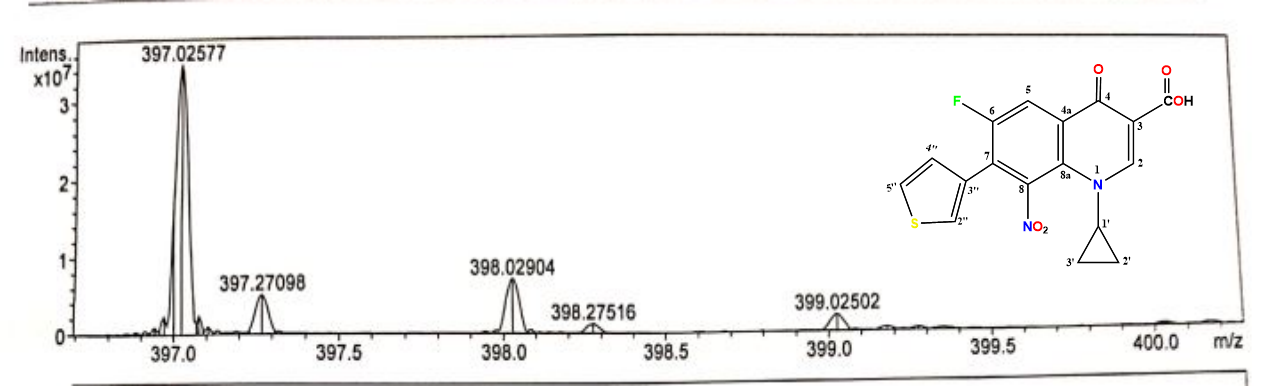


## Figure 2.1: The Mass spectrum for compound 11b, [M+Na]+.


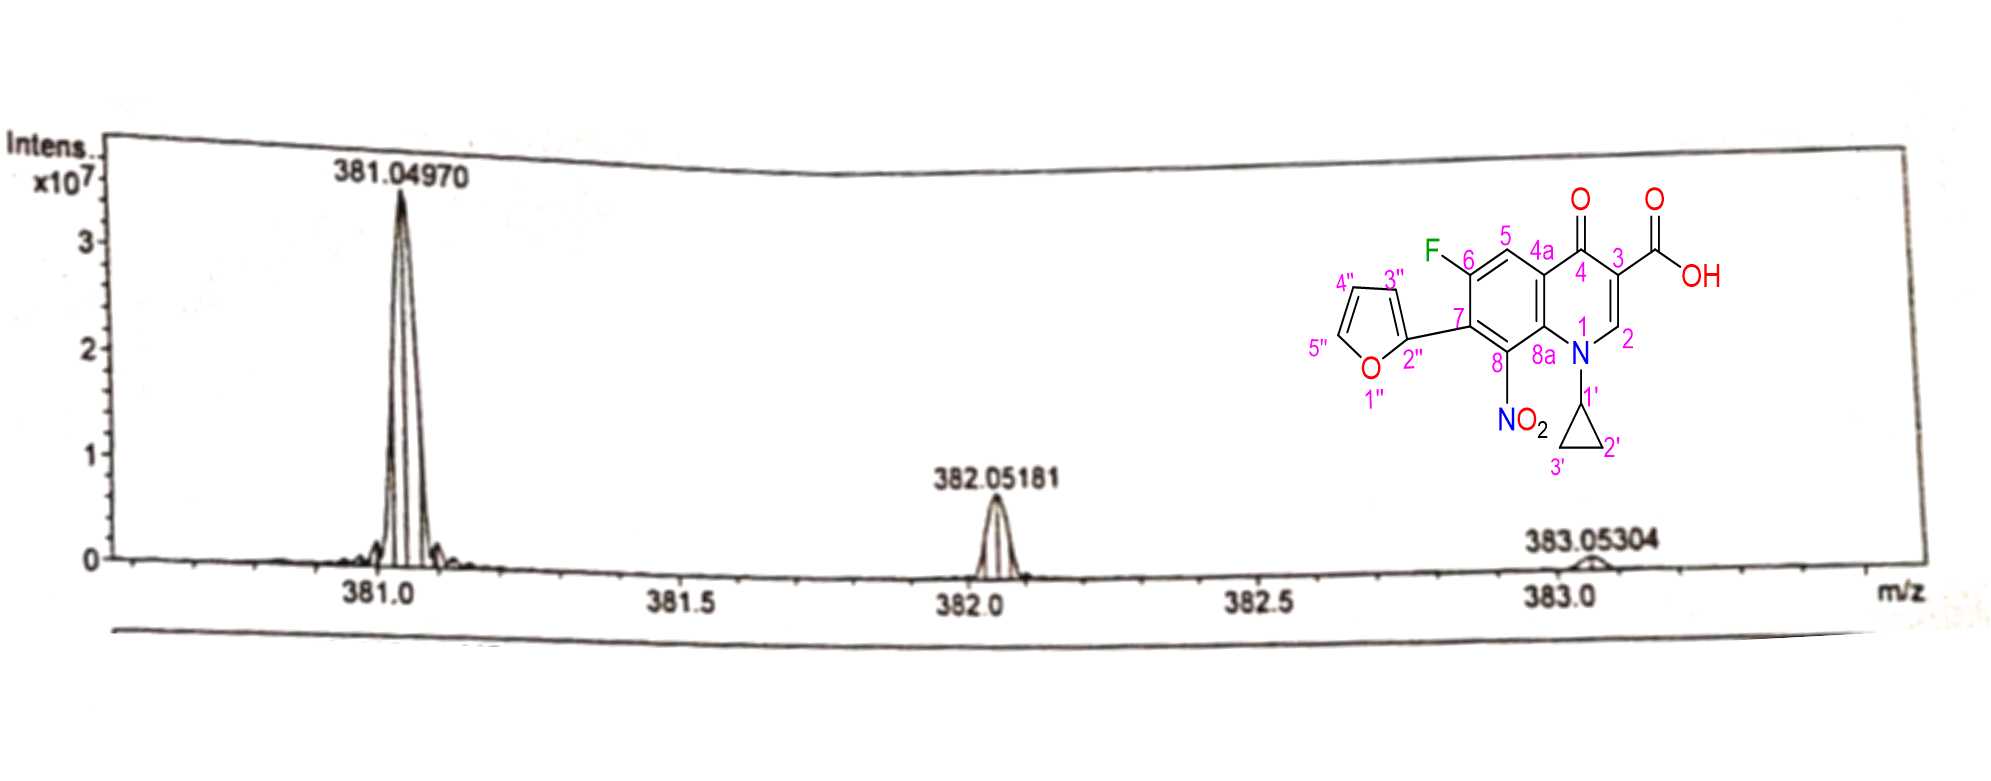


## Figure 2.2: The Mass spectrum for compound 14b, [M+Na]+.


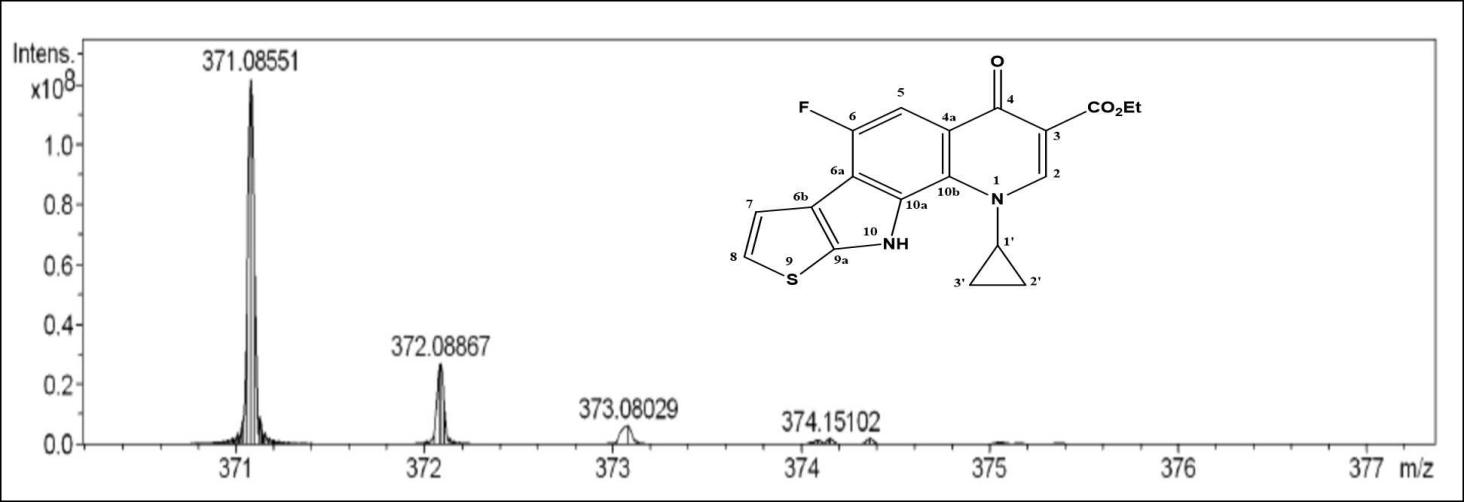


## Figure 2.3: The Mass spectrum for compound 12a, [M+H]+.


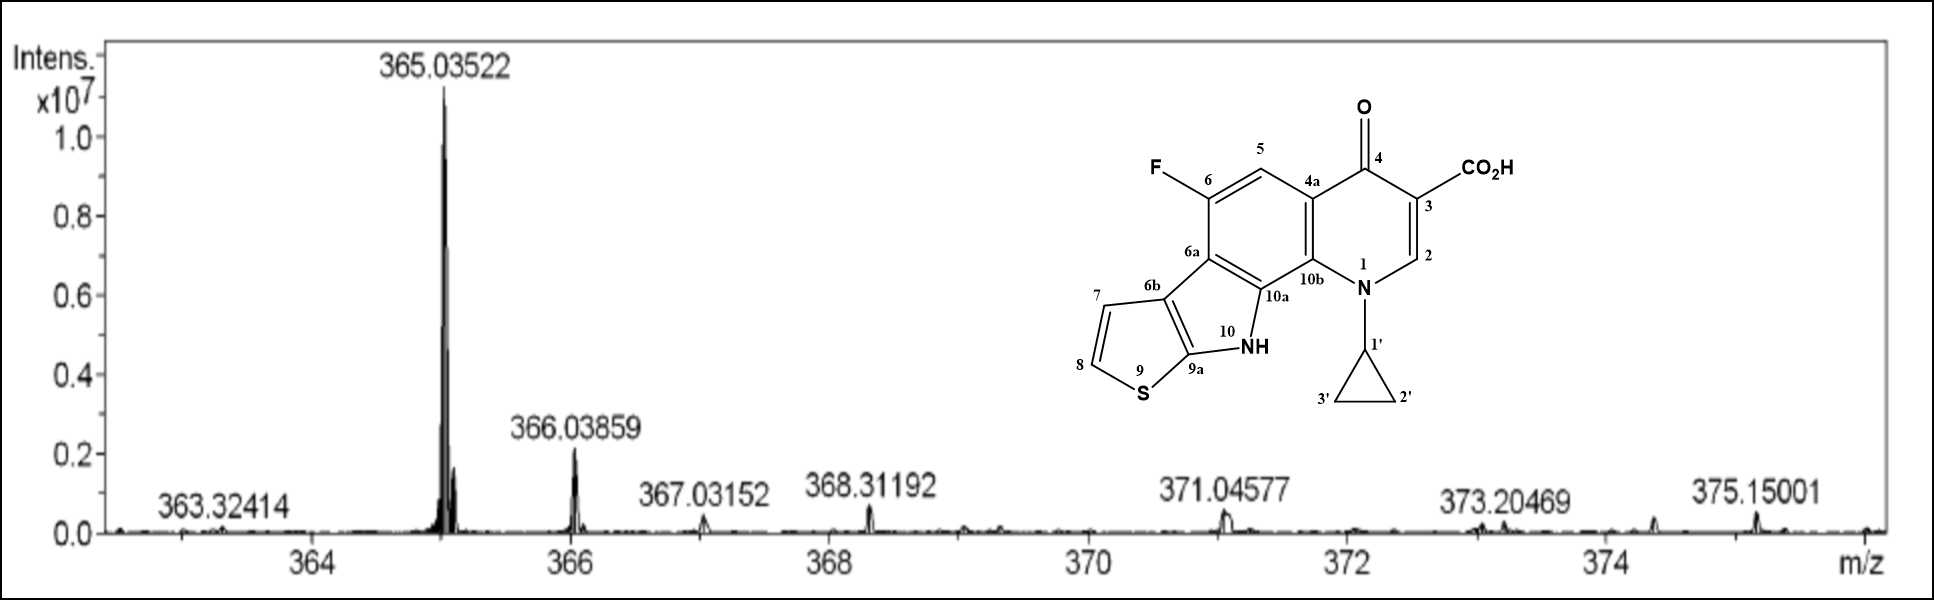


## Figure 2.4: The Mass spectrum for compound 12b, [M+H]+.


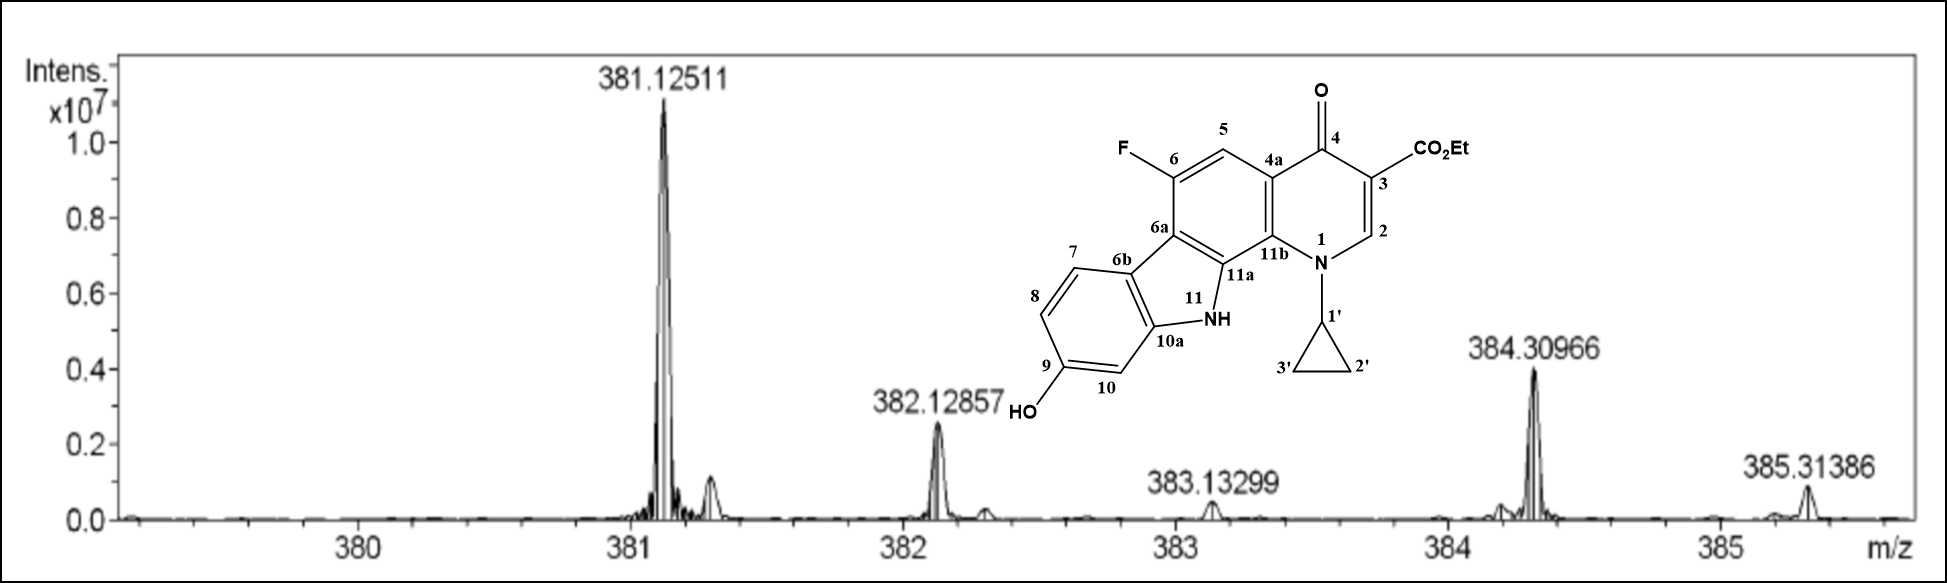


## Figure 2.5: The Mass spectrum for compound20a, [M+H]+.


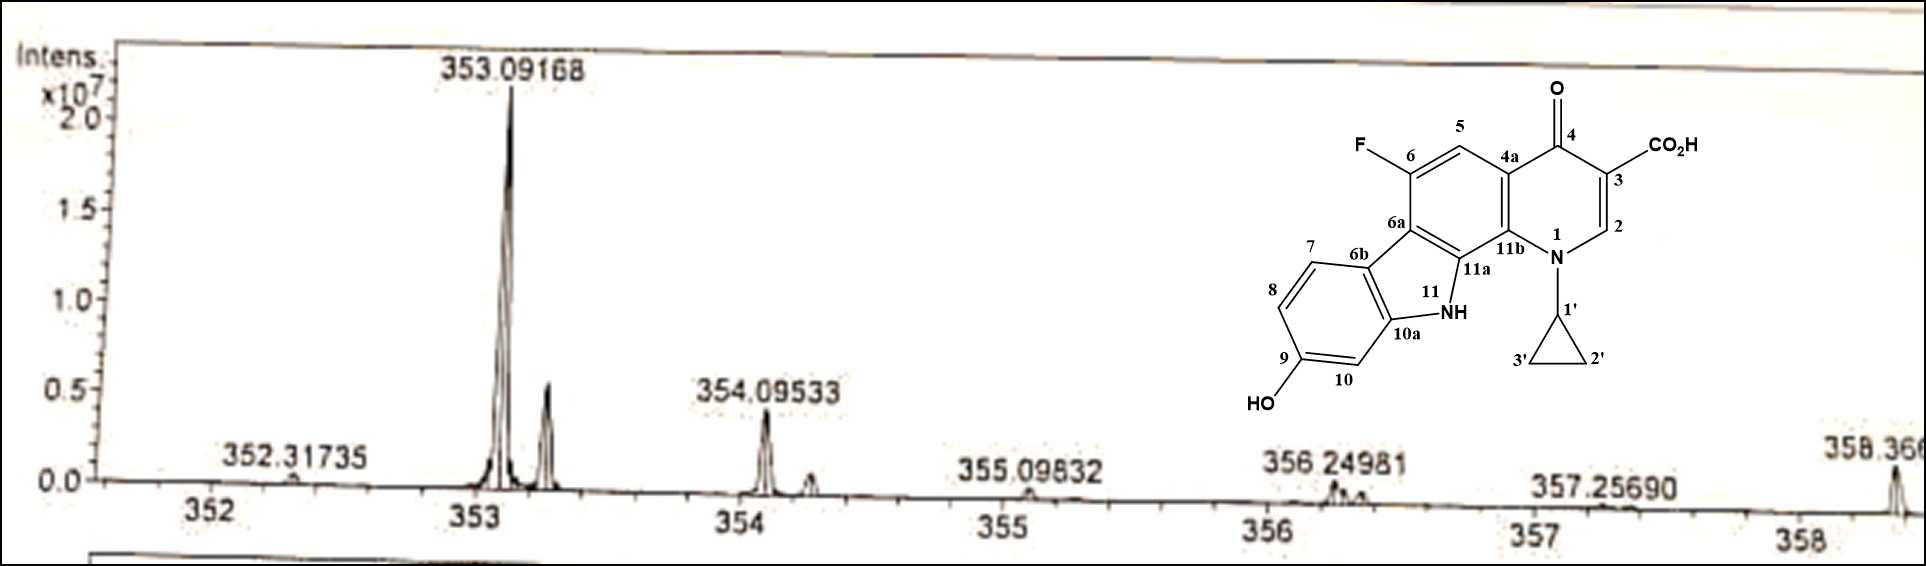


## Figure 2.6: The Mass spectrum for compound 20b, [M+H]+.


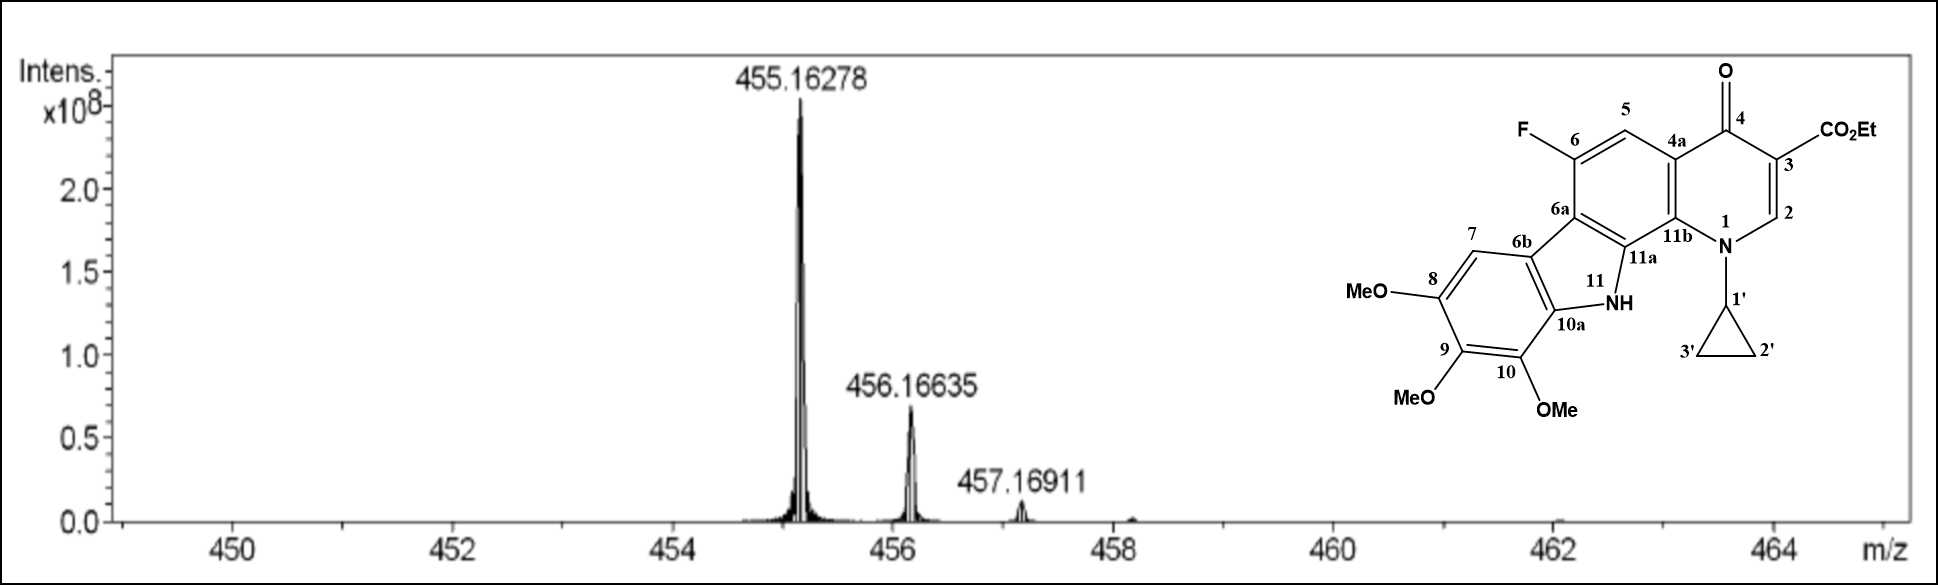


## Figure 2.7: The Mass spectrum for compound 19a, [M+H]+.


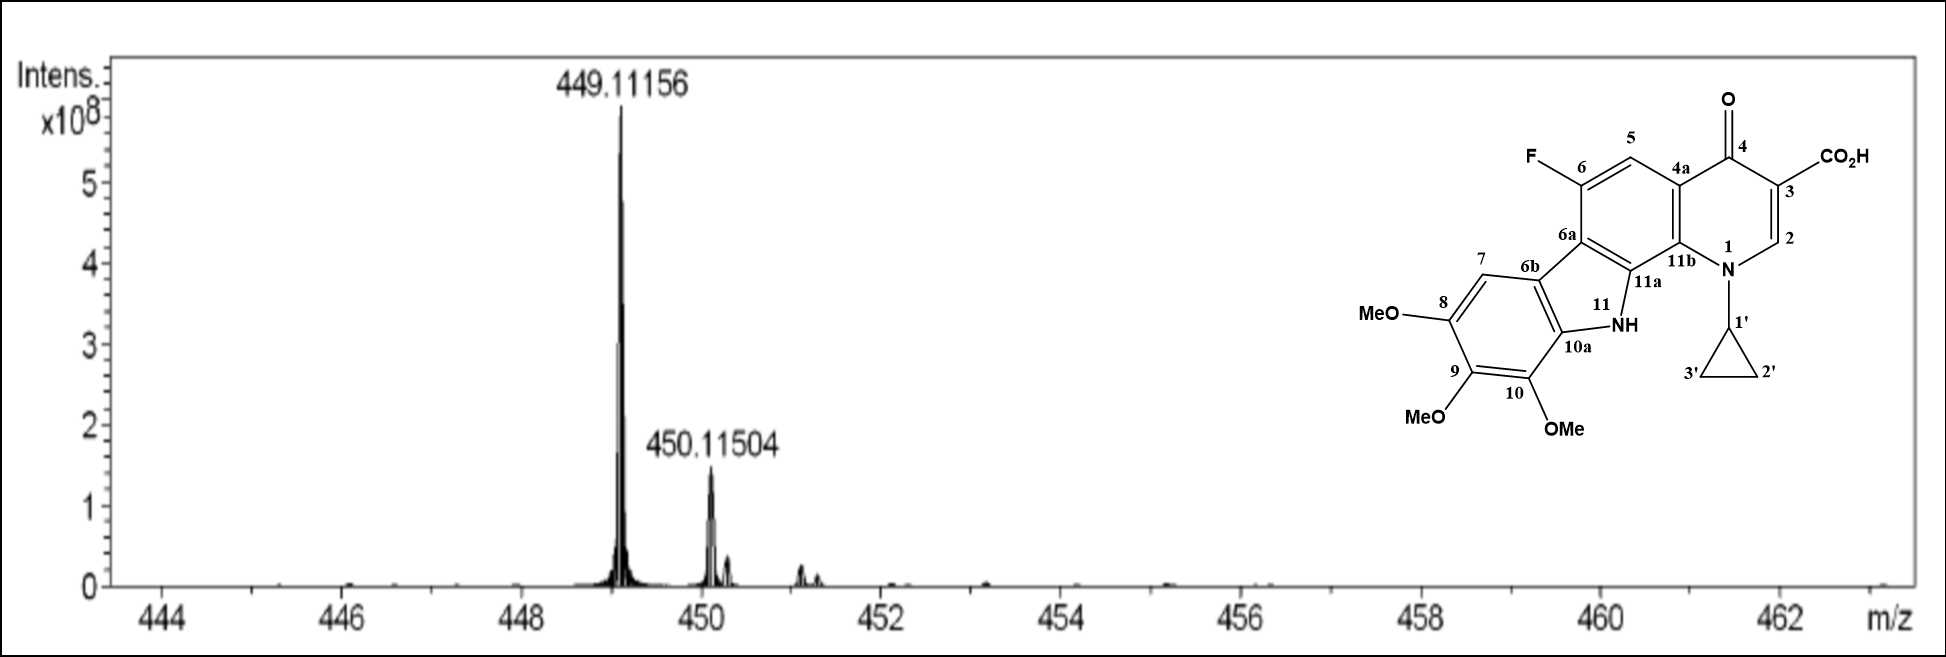


## Figure 2.8: The Mass spectrum for compound 19b, [M+Na]+.

# IR-SPECTRUM


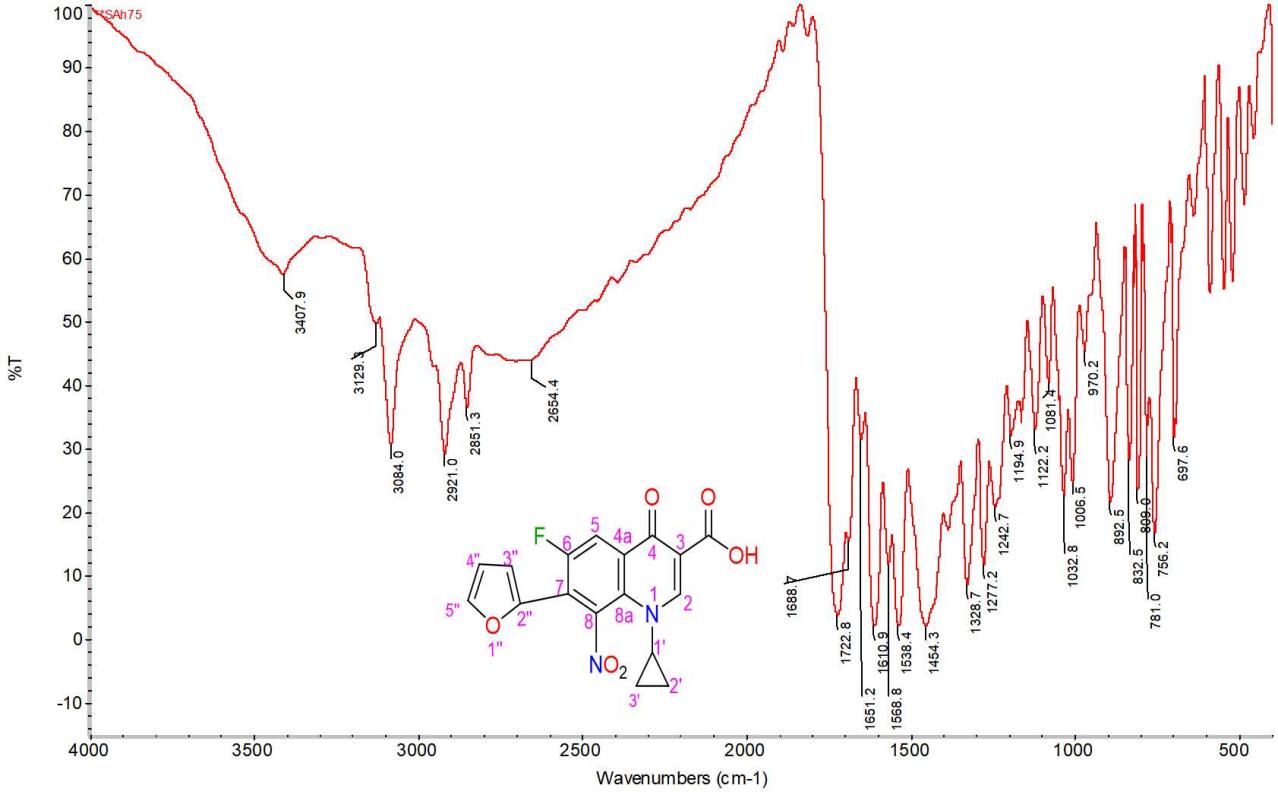


## Figure 3.1: The IR spectrum for compound 14b.


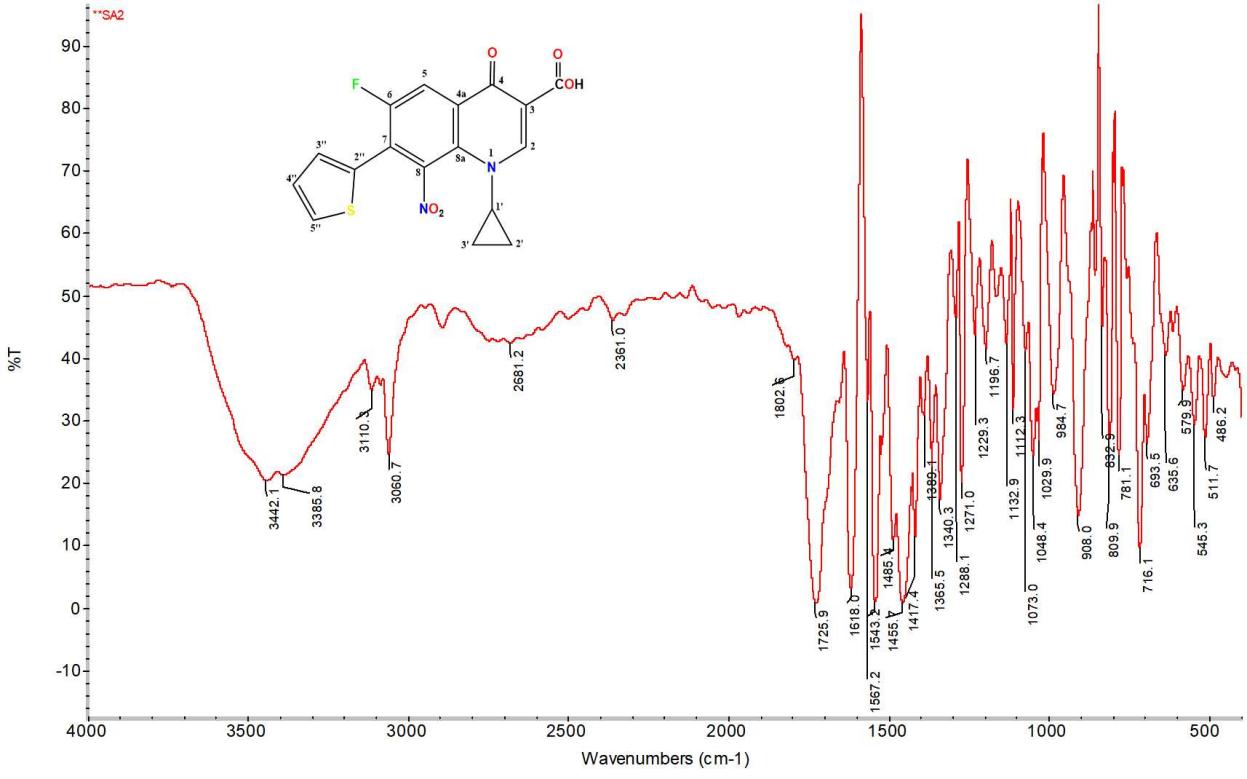


## Figure 3.2: The IR spectrum for compound 13b.


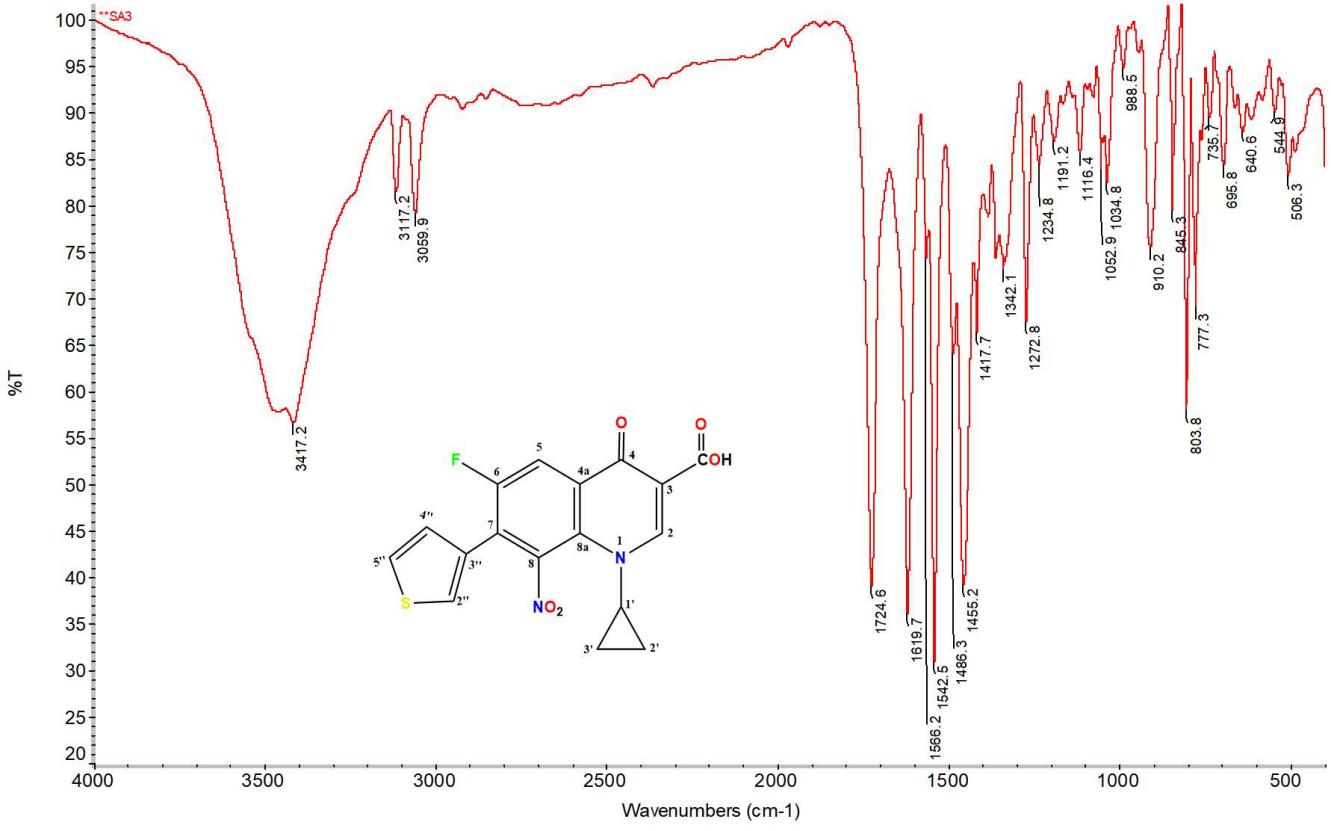


## Figure 3.3: The IR spectrum for compound 11b.


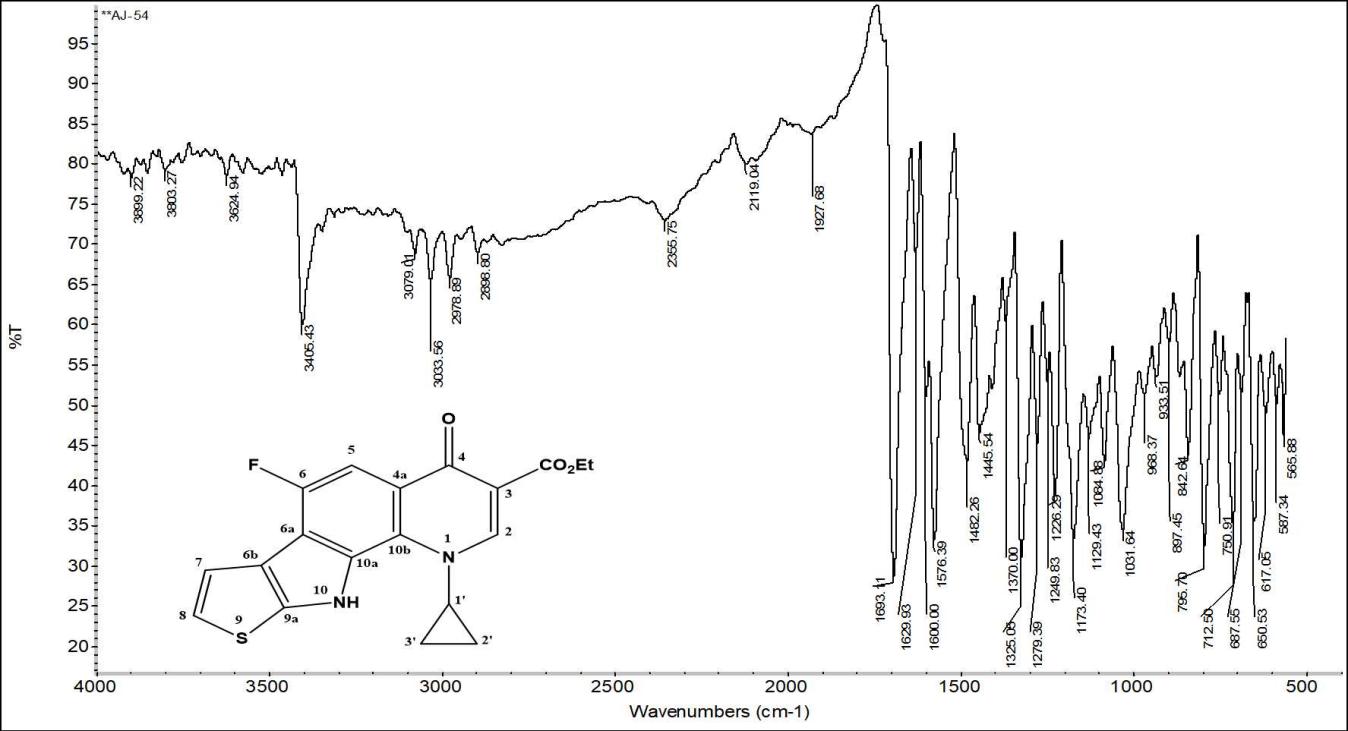


## Figure 2.4: The IR spectrum for compound 12a.


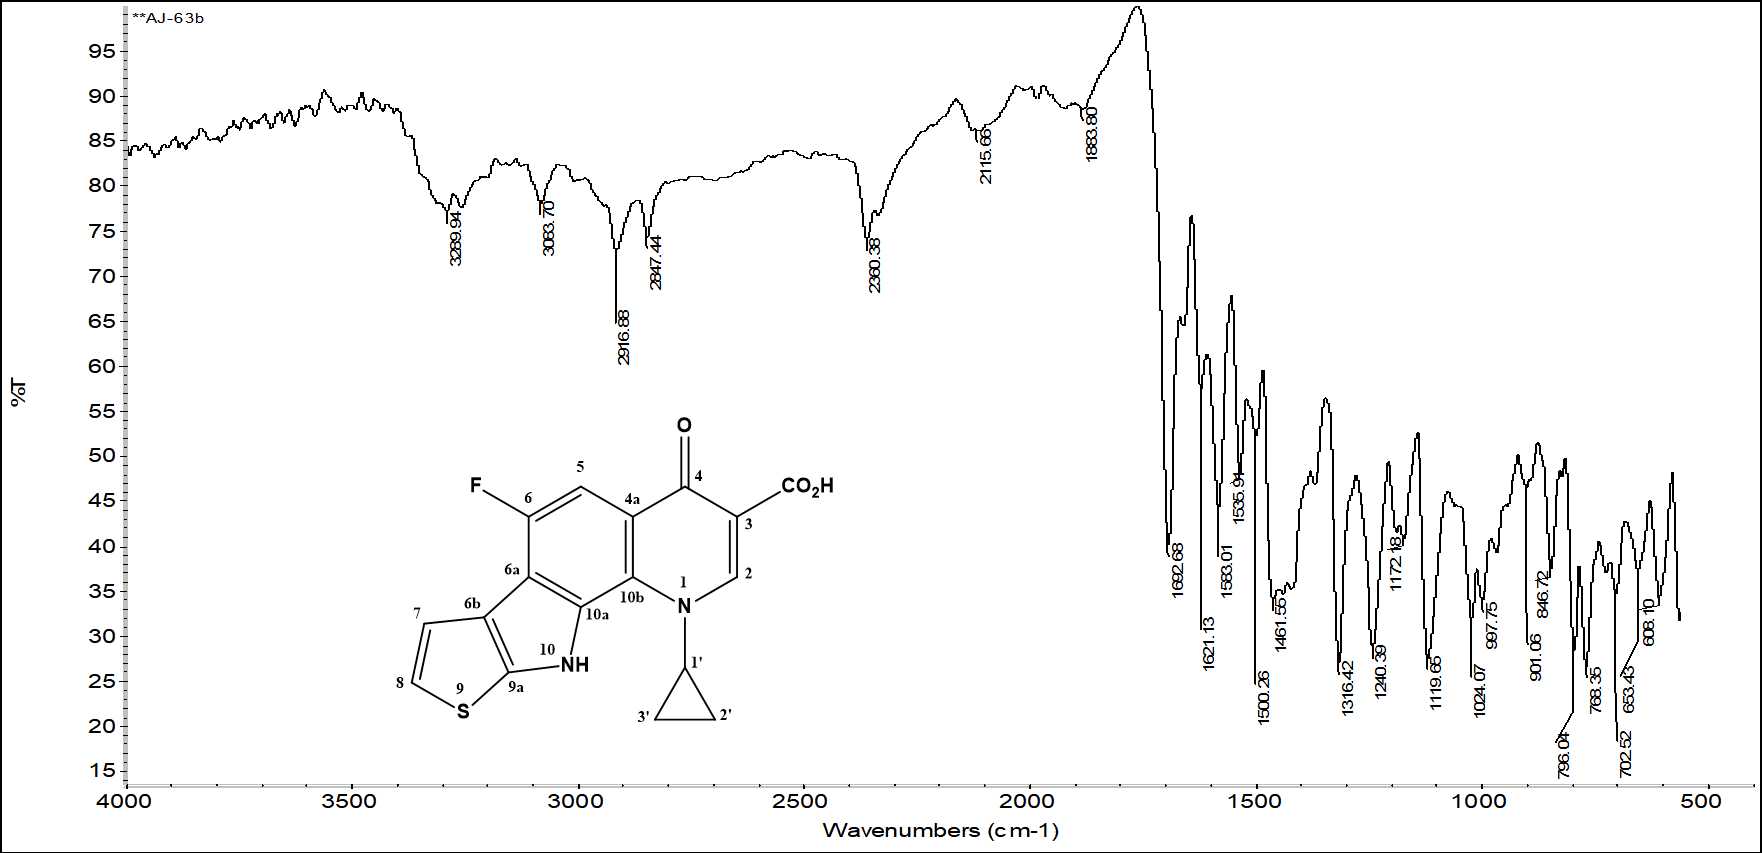


## Figure 3.5: The IR spectrum for compound12b.


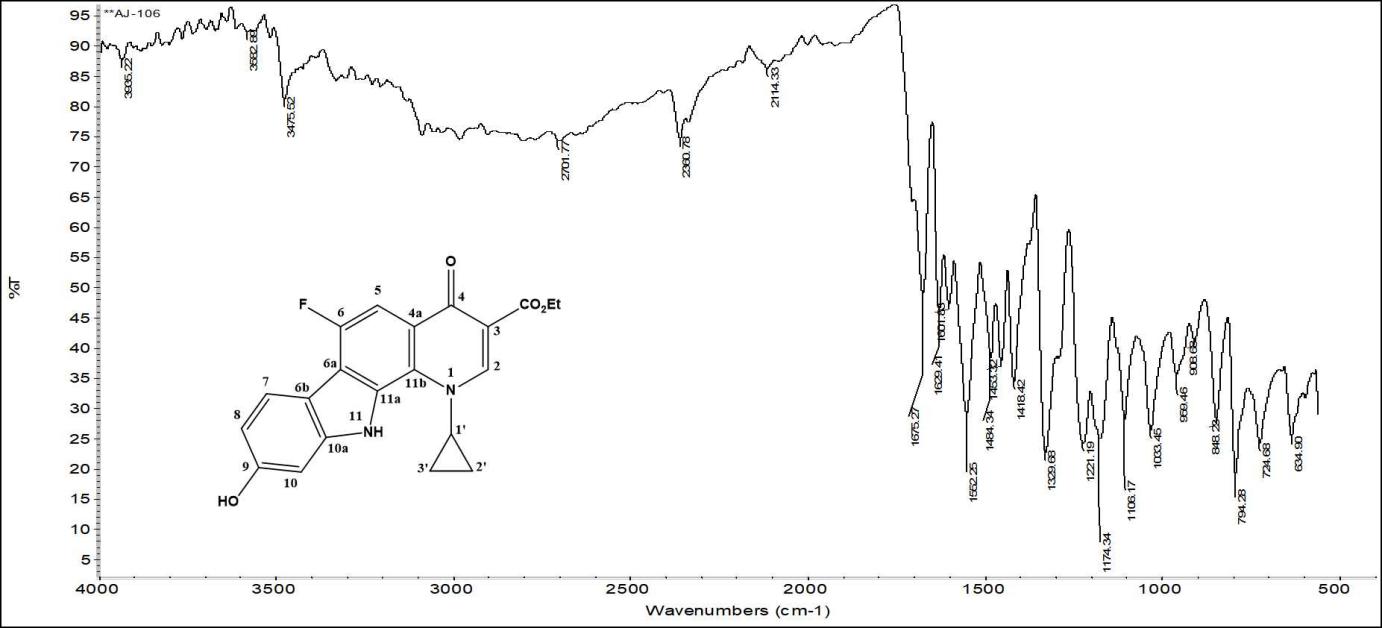


## Figure 3.6: The IR spectrum for compound 20a.


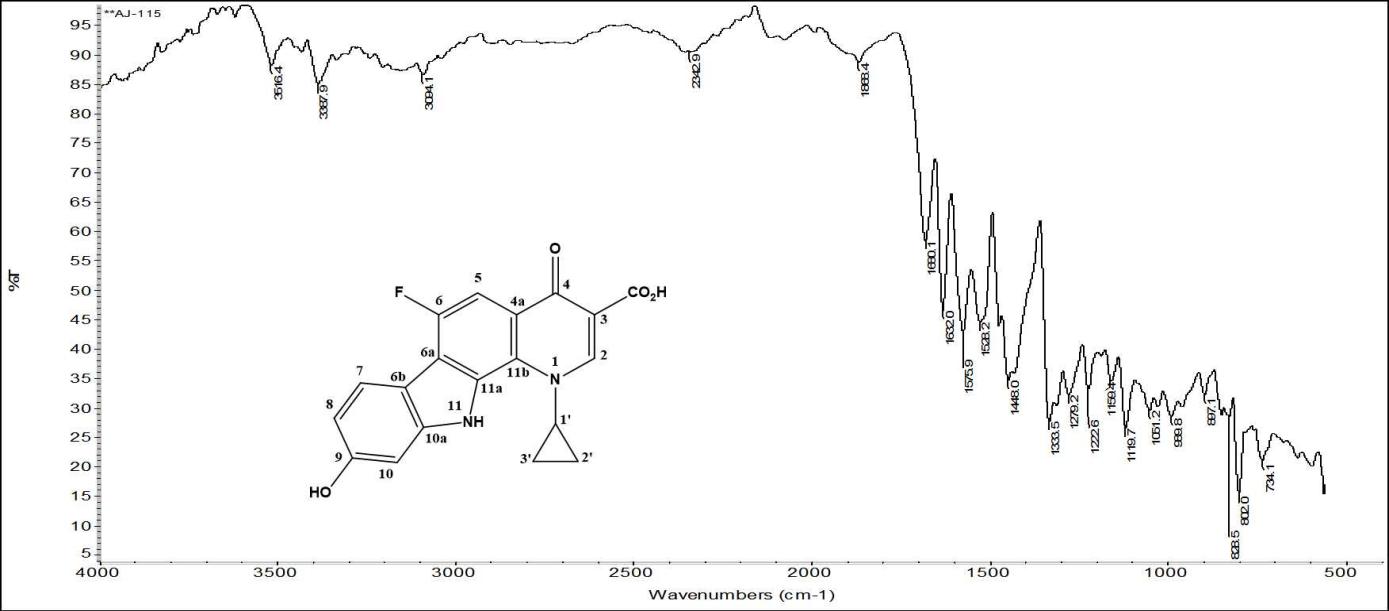


## Figure 3.7: The IR spectrum for compound 20b.


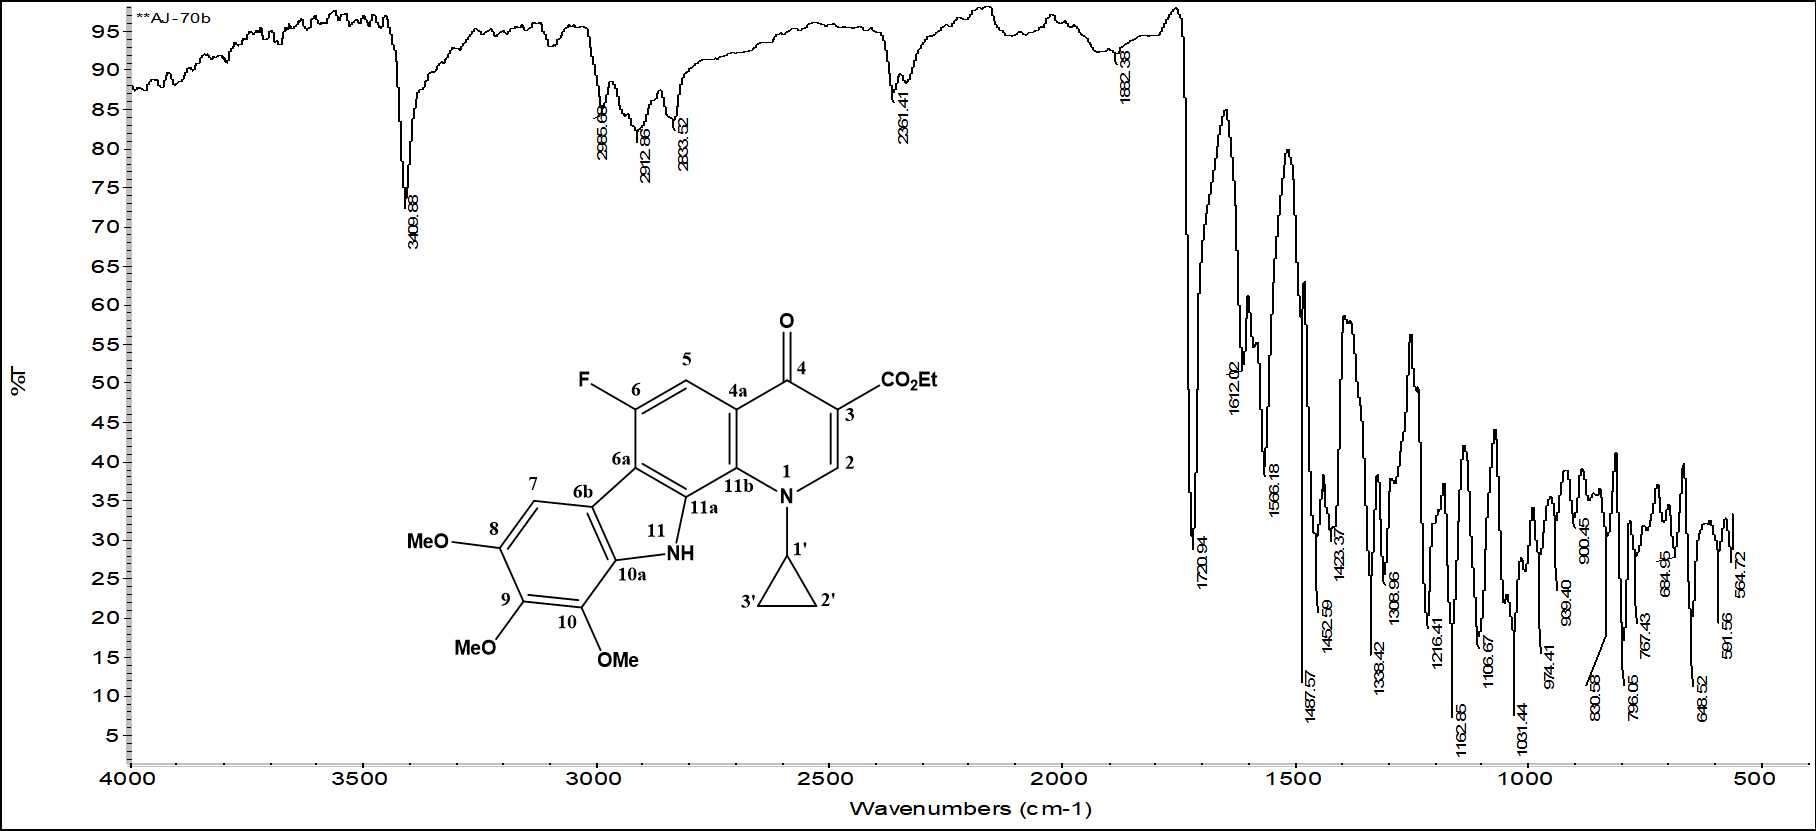


## Figure 3.8: The IR spectrum for compound 19a.


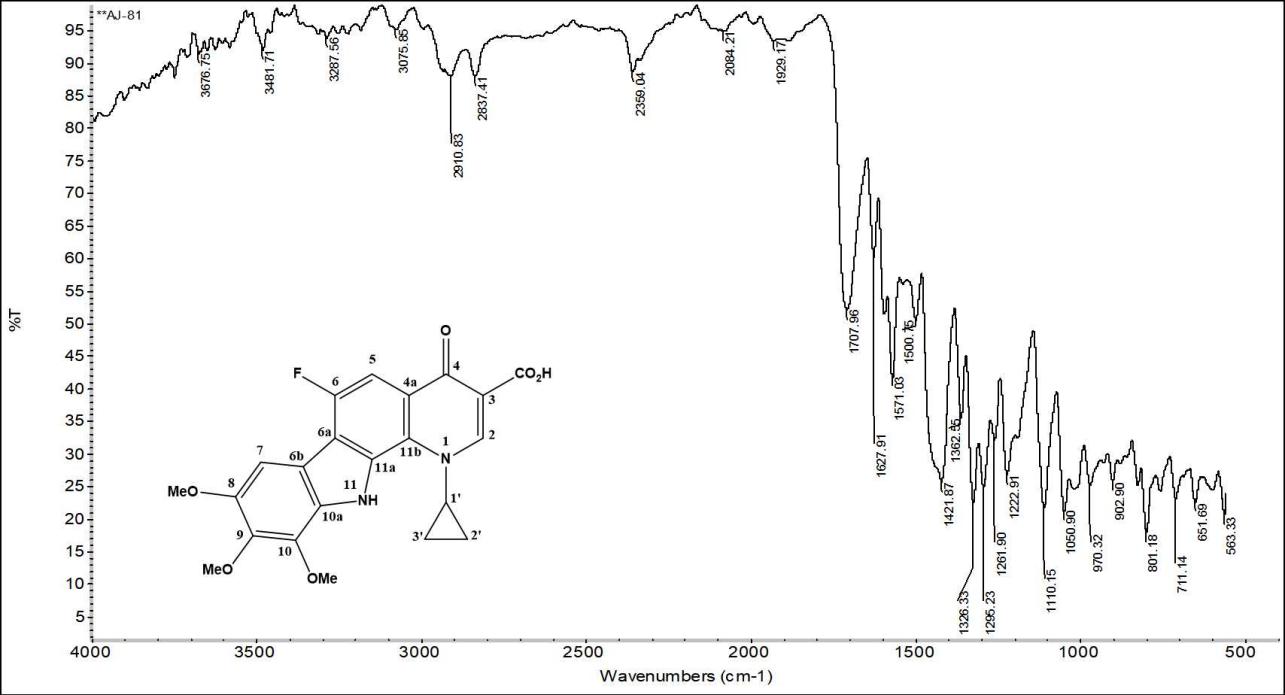


## Figure 3.9: The IR spectrum for compound 19b.


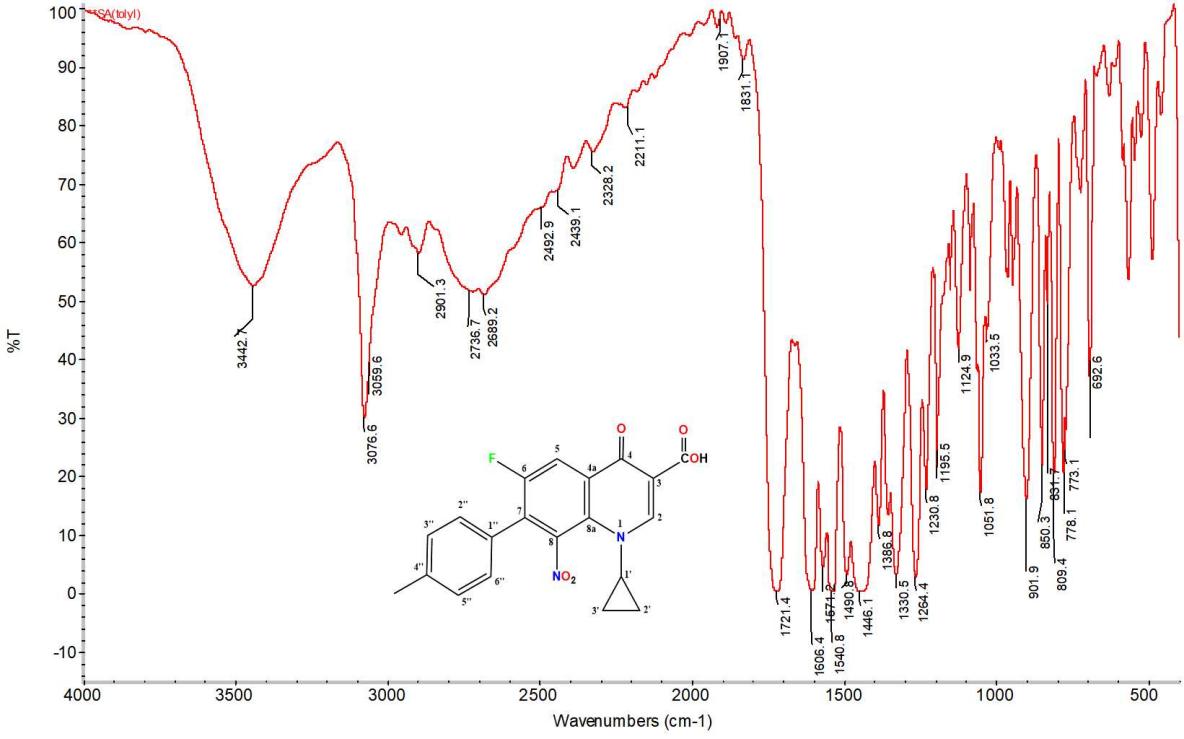


## Figure 3.10: The IR spectrum for compound 18b.


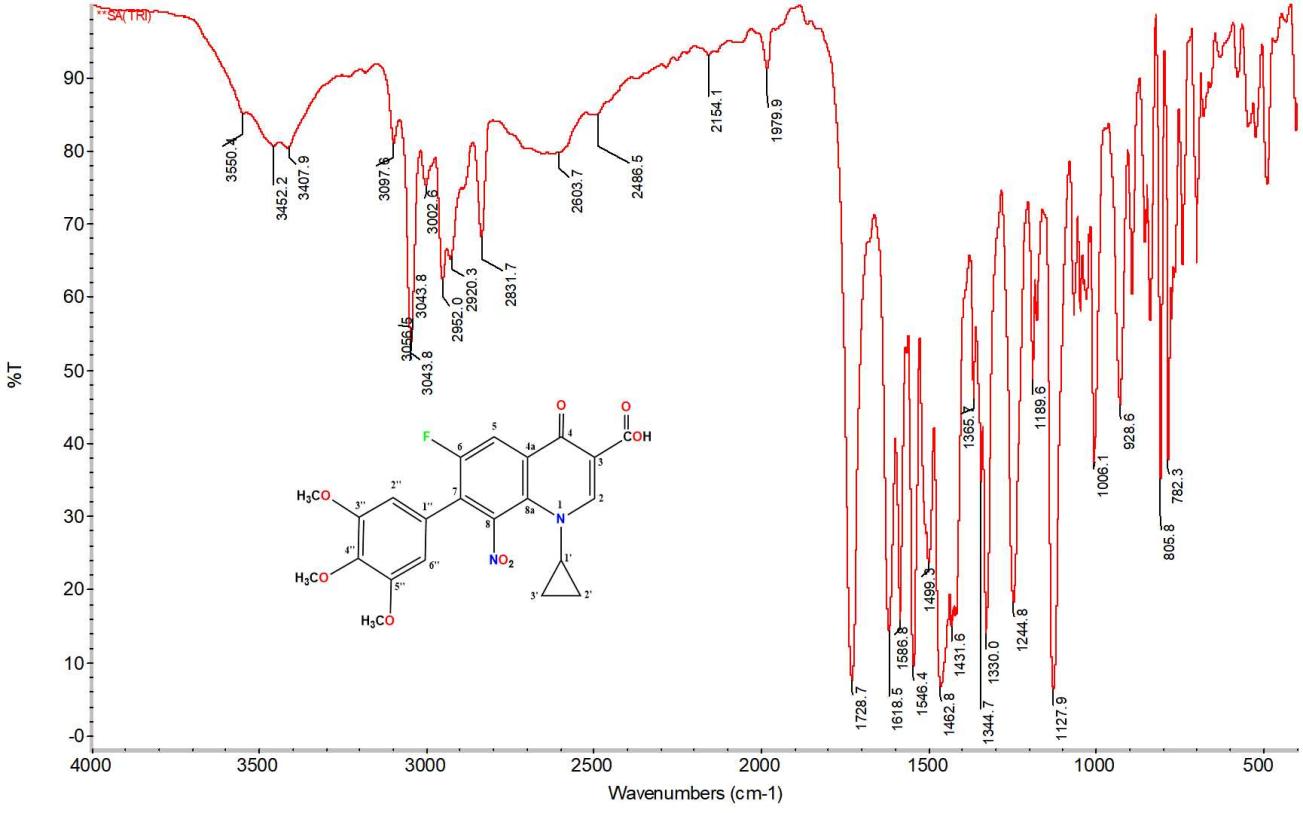


## Figure 3.11: The IR spectrum for compound 16b.
